# Supplementary material
Source: bioRxiv or medRxiv preprint supplement (https://www.biorxiv.org/highwire/filestream/86349/field_highwire_adjunct_files/5/281584-6.pdf)
Supplement: Supplementary file [file 281584-6.pdf]

# Appendix 6

October 30, 2017

## Home Range

For six individual Gunnison sage-grouse, we estimate home range for two seasons (Breeding and Summer) across multiple years. For each figure below, home range area estimates for sage-grouse are estimated via convex hull (top plot) and kernel estimation (bottom plot) where spatial location uncertainty is incorporated via the azimuthal telemetry model (ATM) or ignored using Lenth (1981) estimation. Right-sided figures depict a histogram of the posterior distribution of the area of the home range when accounting for animal location uncertainty via the ATM; the vertical line is the point estimate of home range area when animal locations are estimated using Lenth (1981) estimation and location uncertainty is ignored.

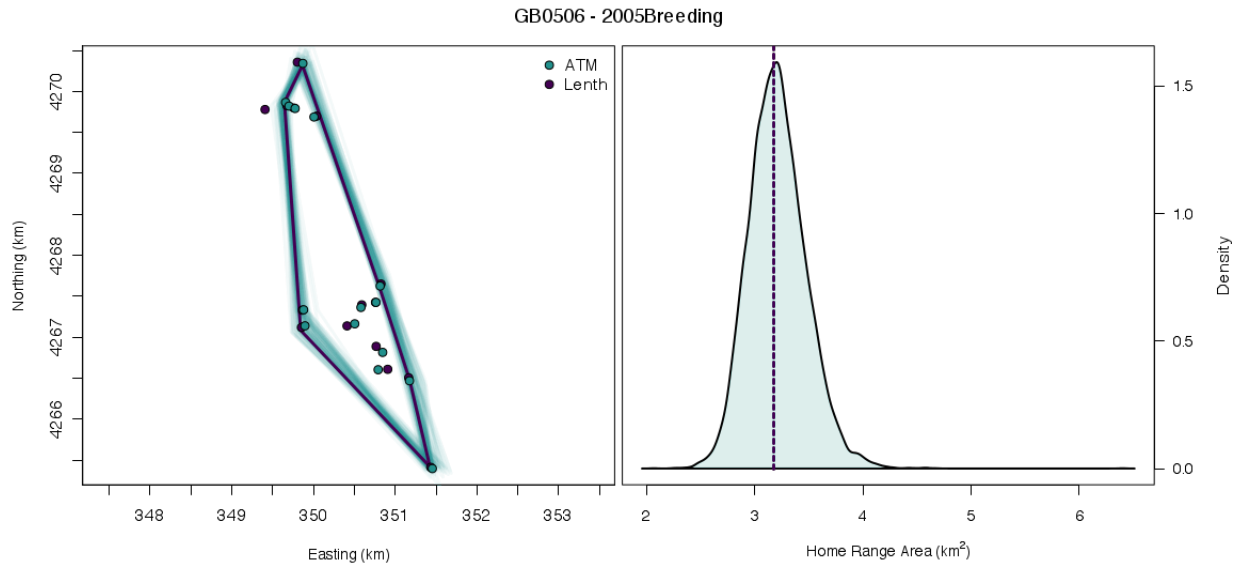

(a)

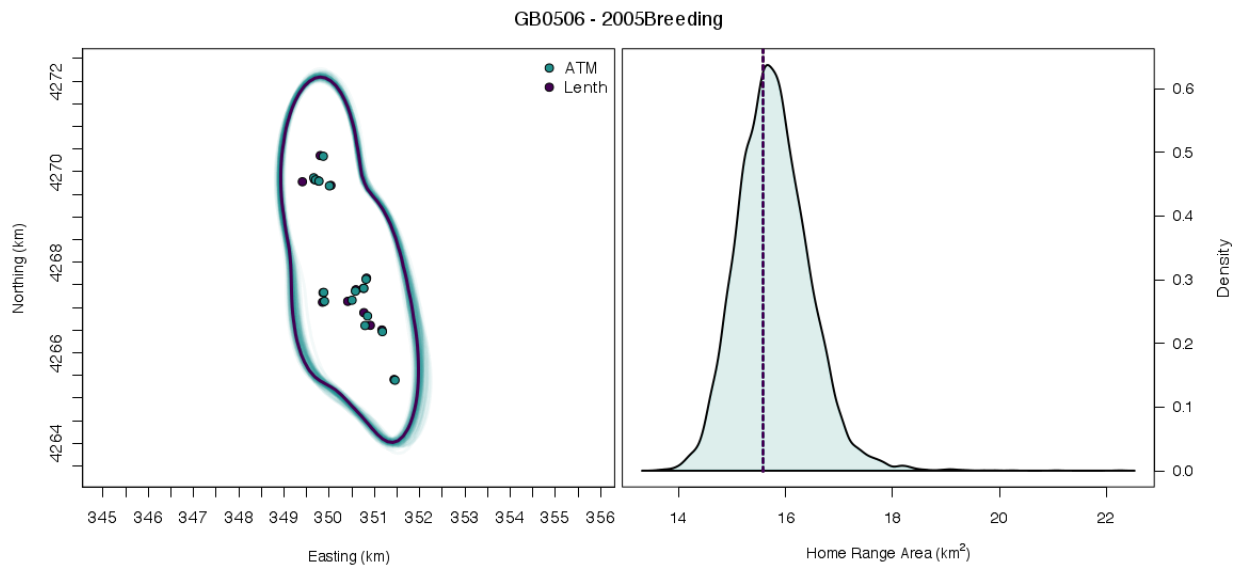

(b)

Figure 1

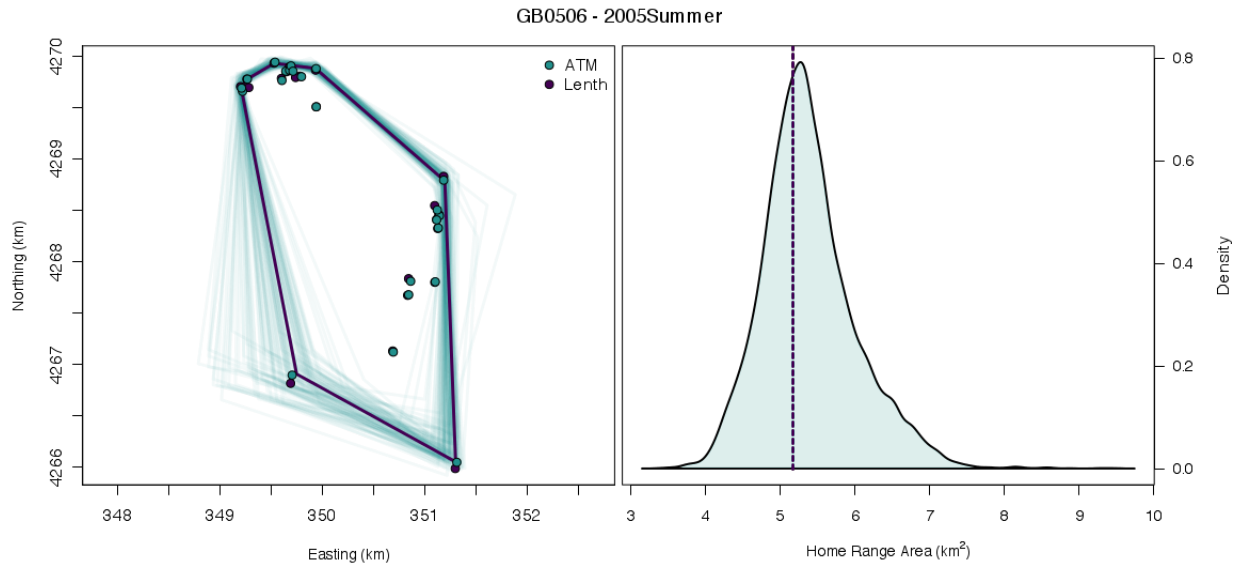

(a)

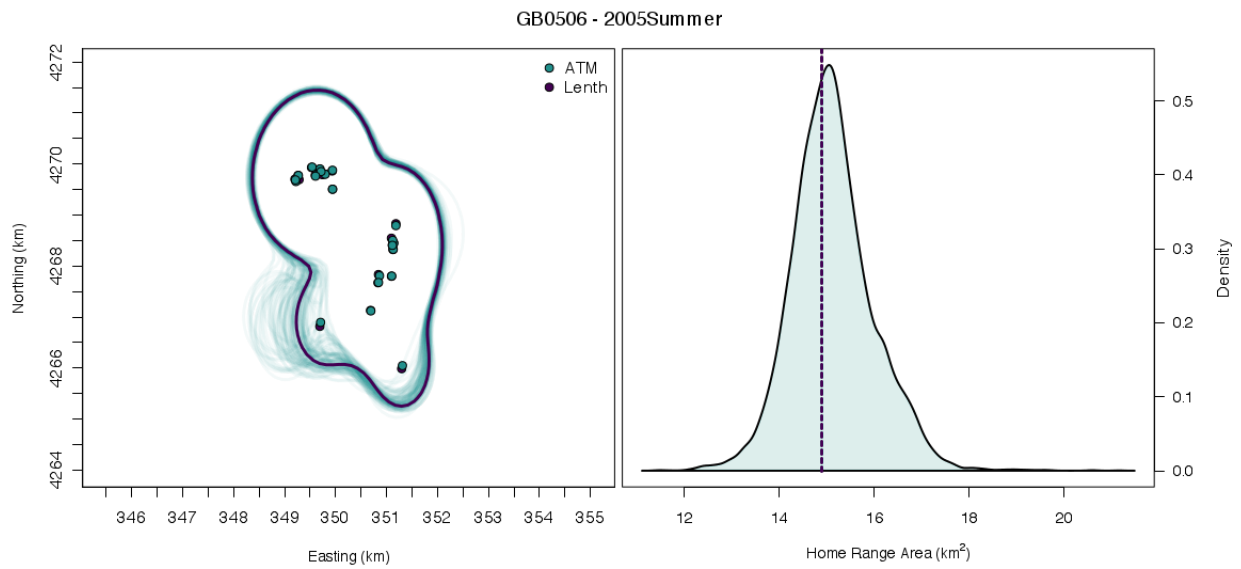

(b)

Figure 2

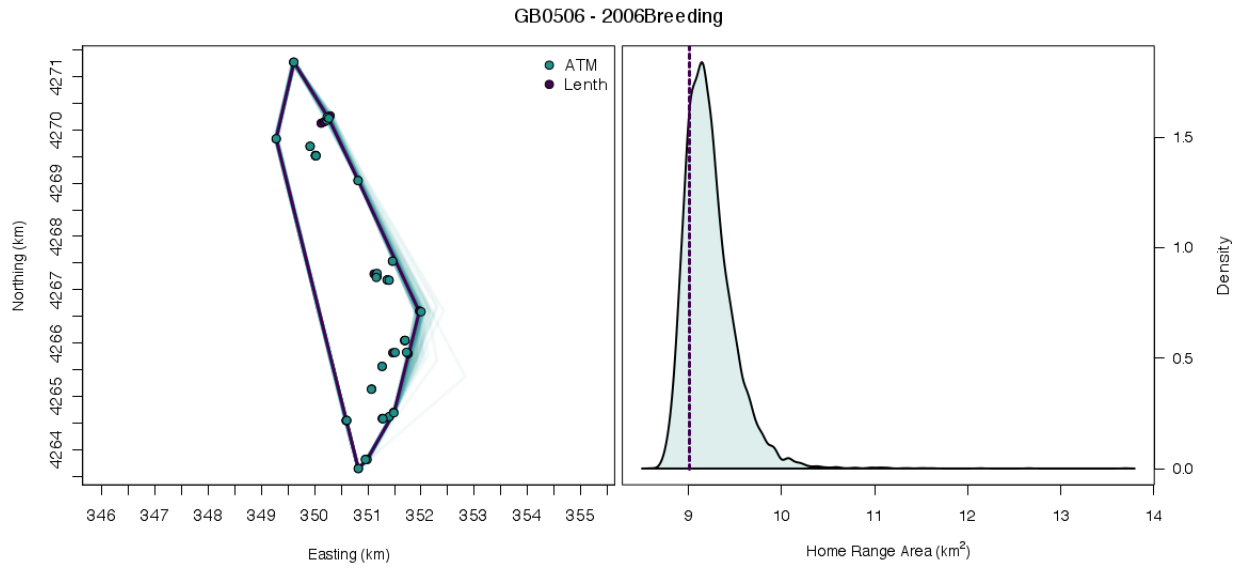

(a)

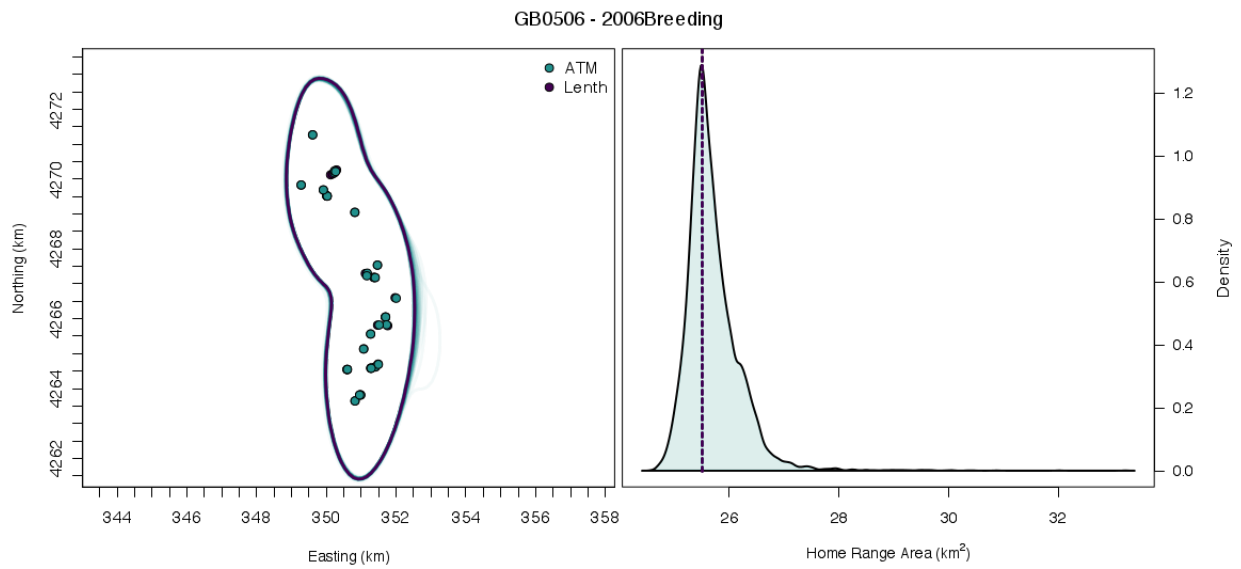

(b)

Figure 3

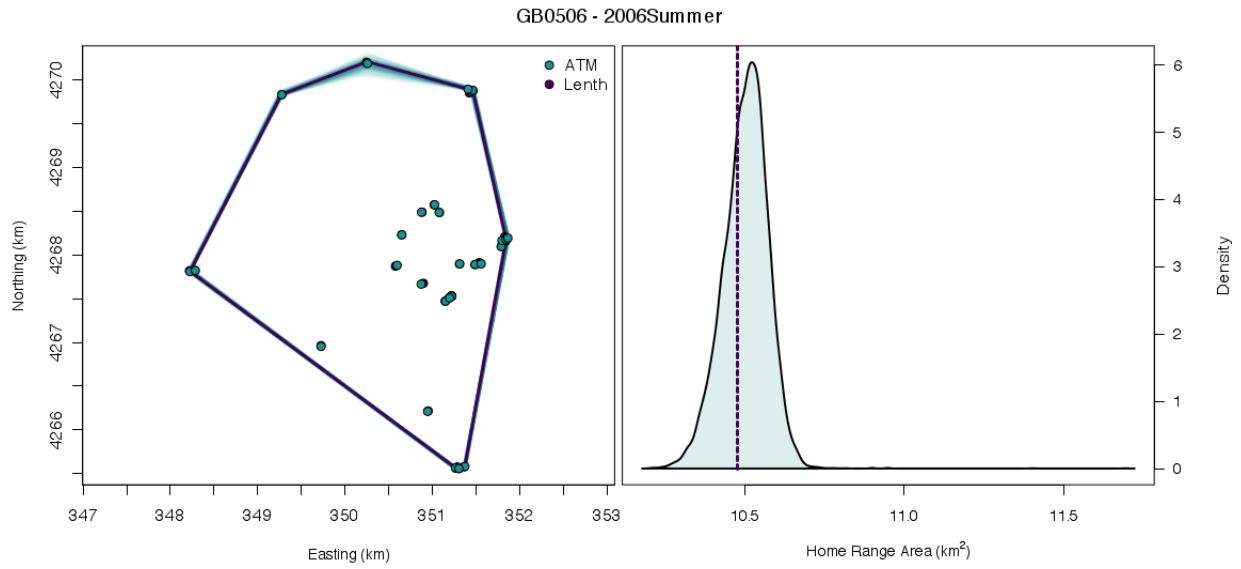

(a)

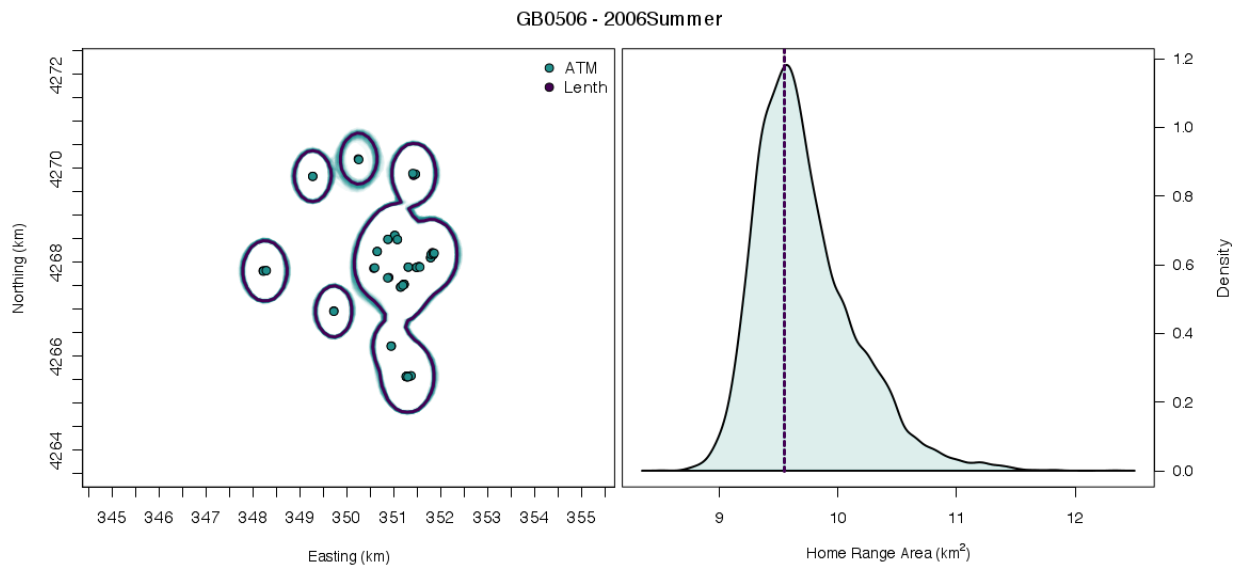

(b)

Figure 4

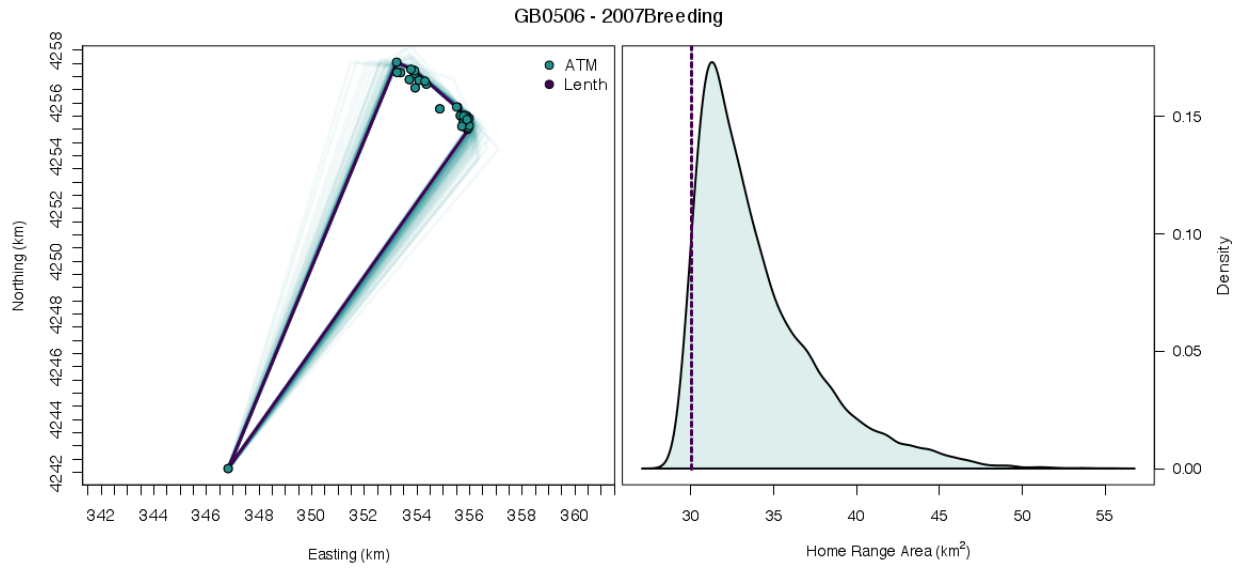

(a)

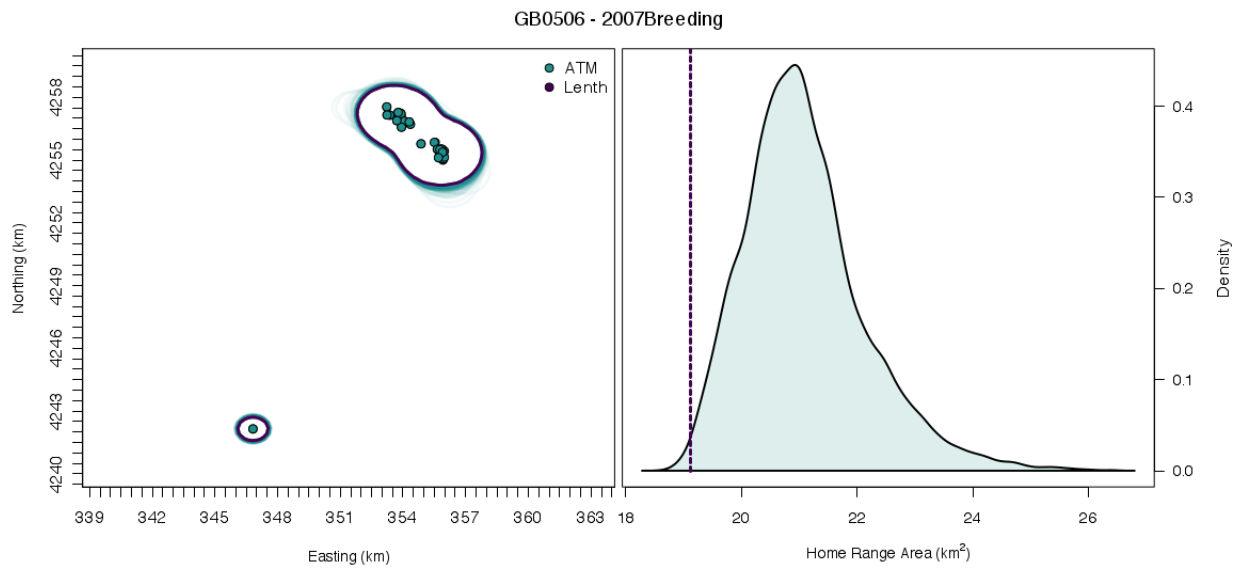

(b)

Figure 5

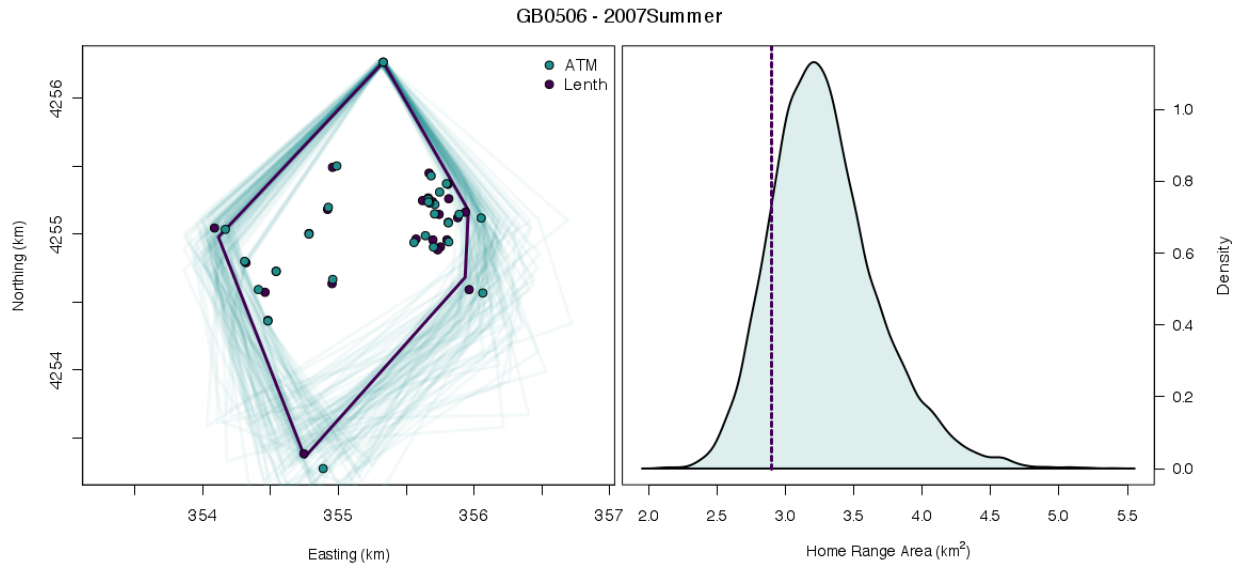

(a)

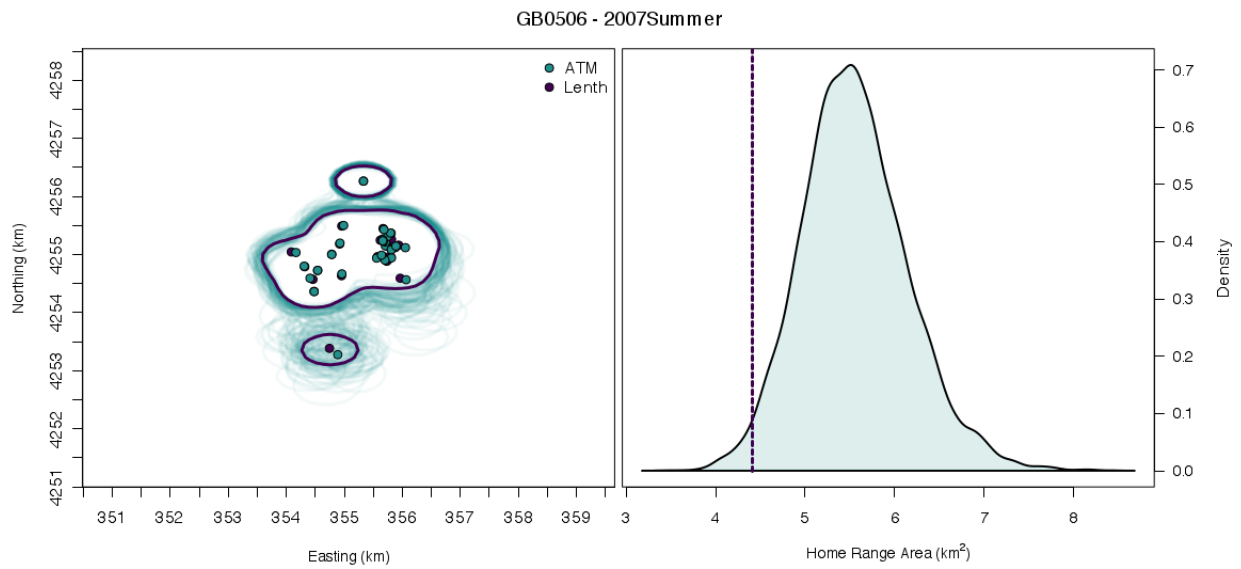

(b)

Figure 6

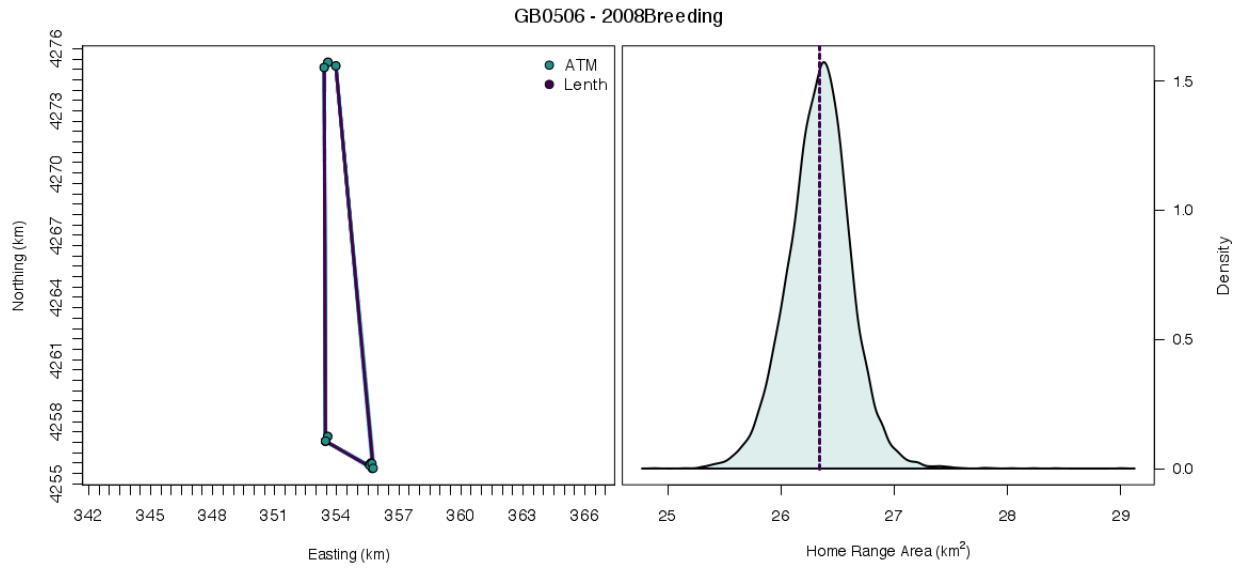

(a)

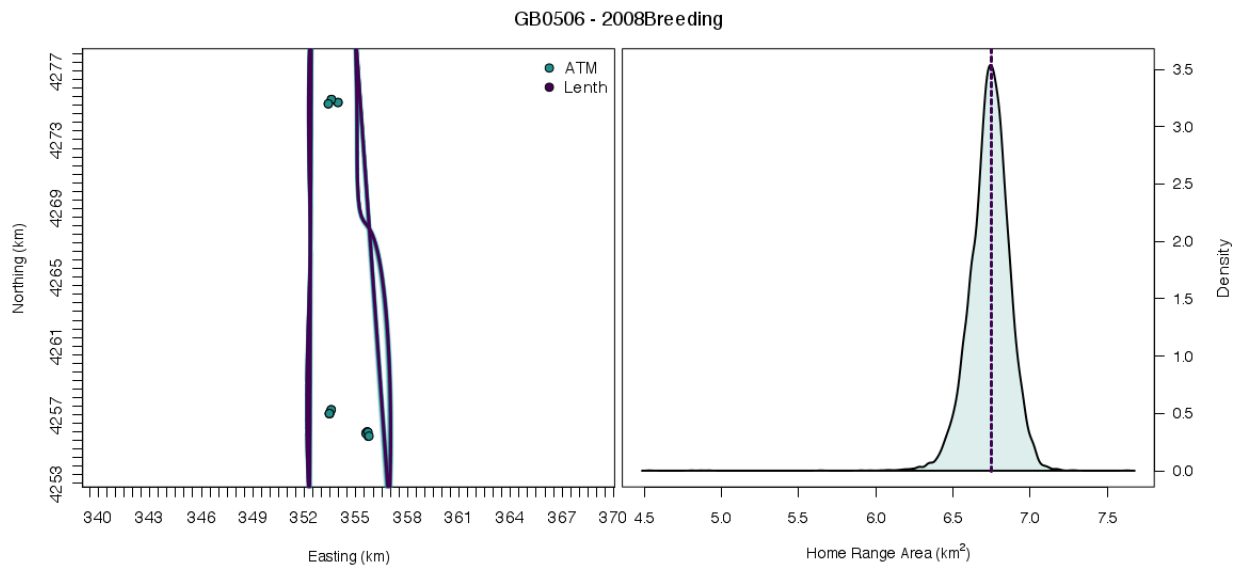

(b)

Figure 7



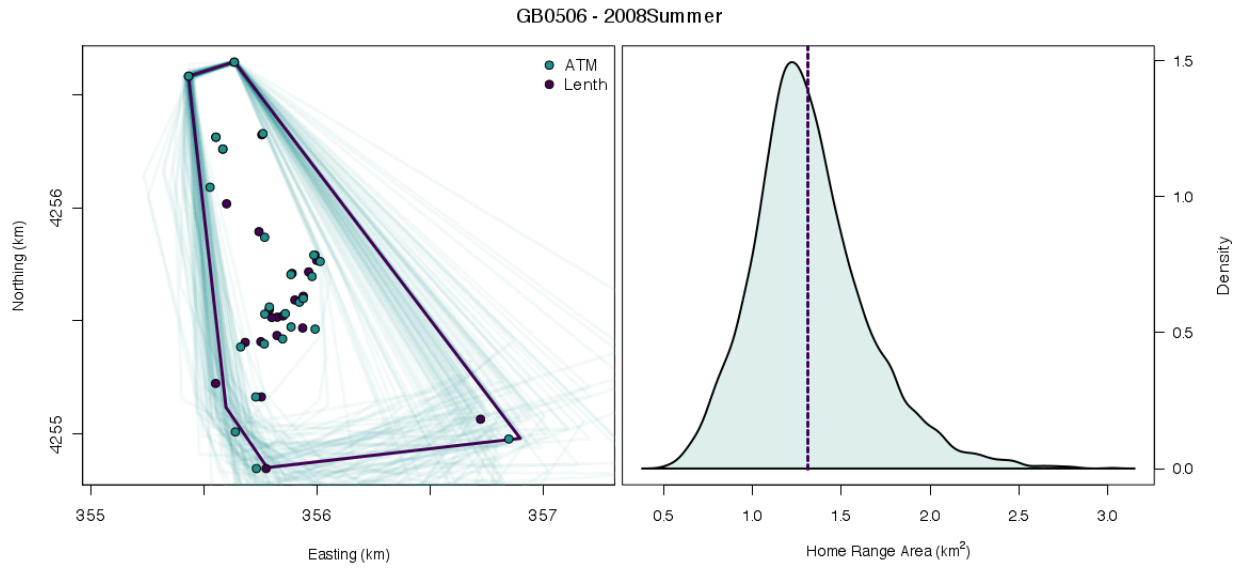

(a)

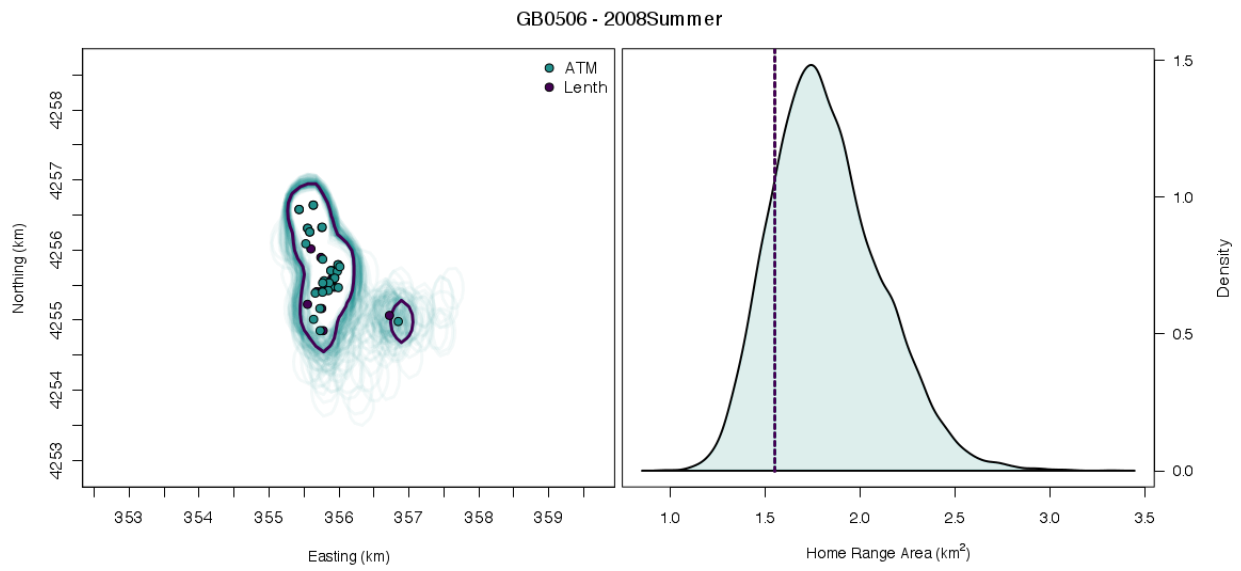

(b)

Figure 8

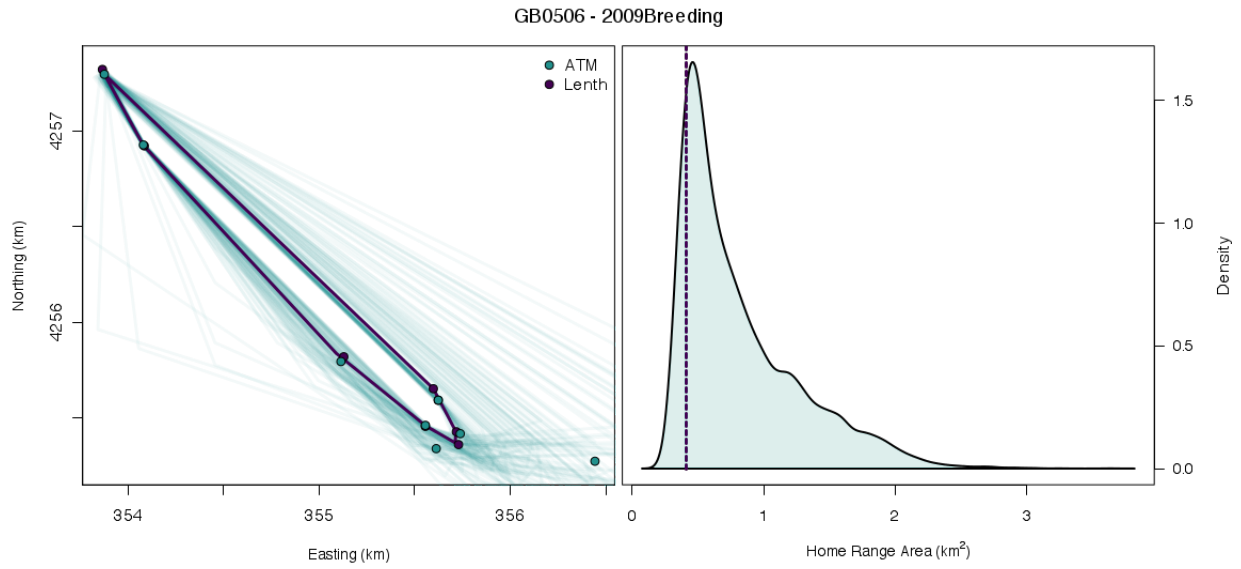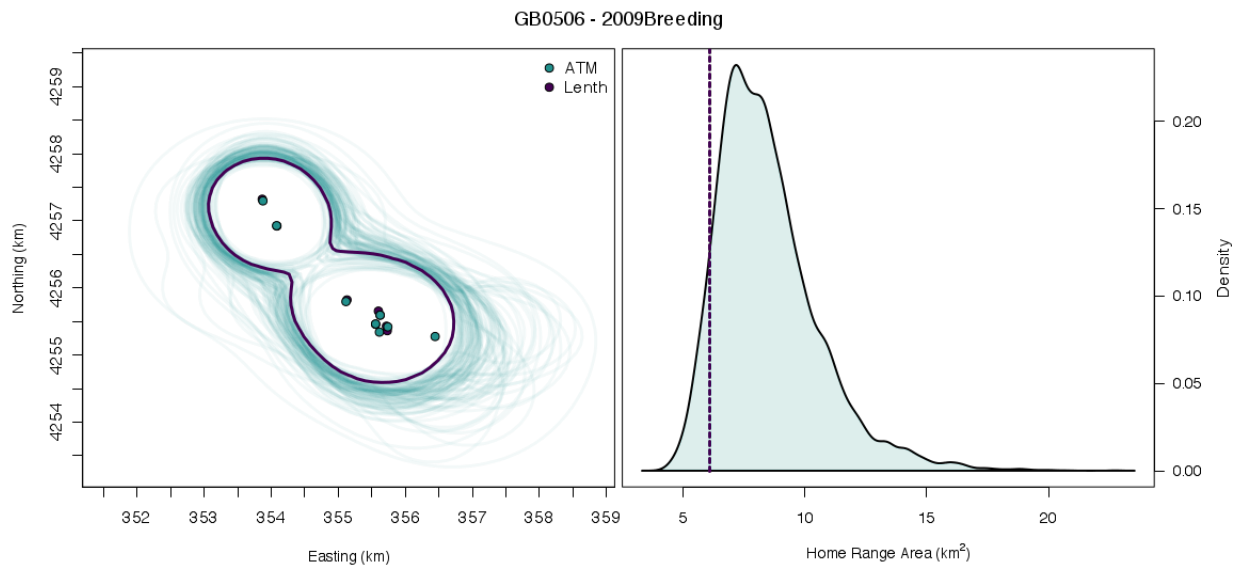

Figure 9

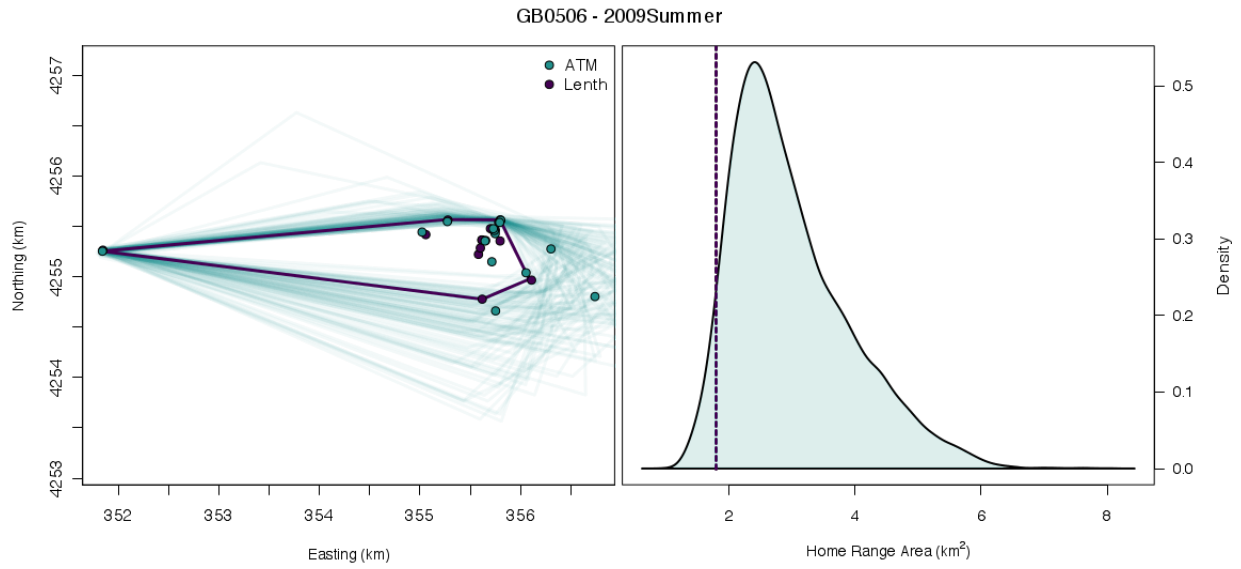

(a)

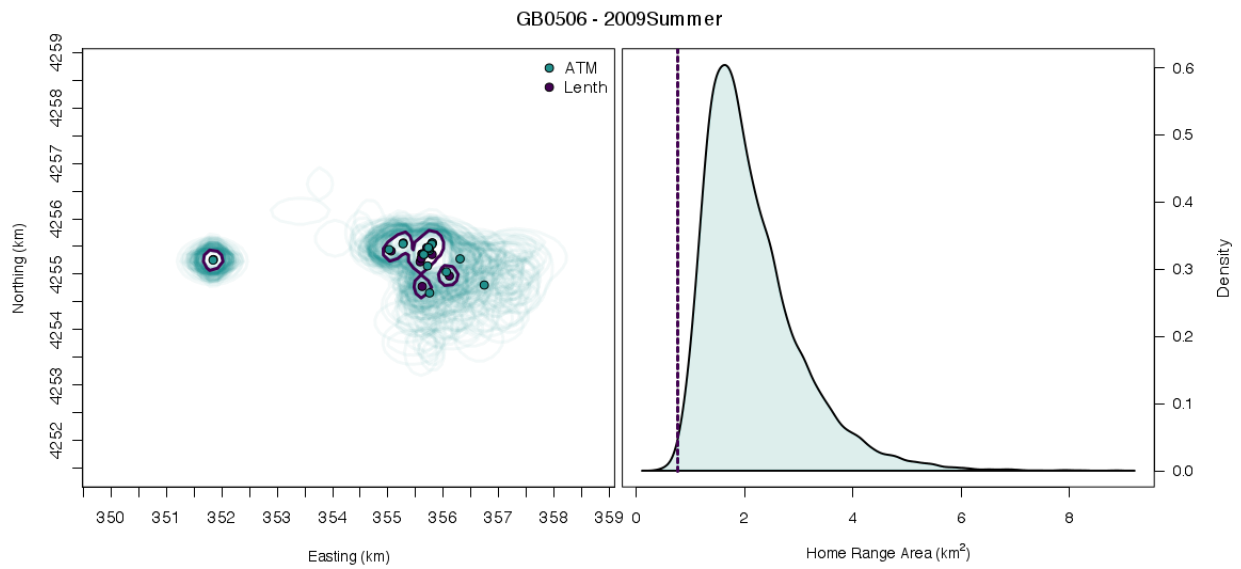

(b)

Figure 10

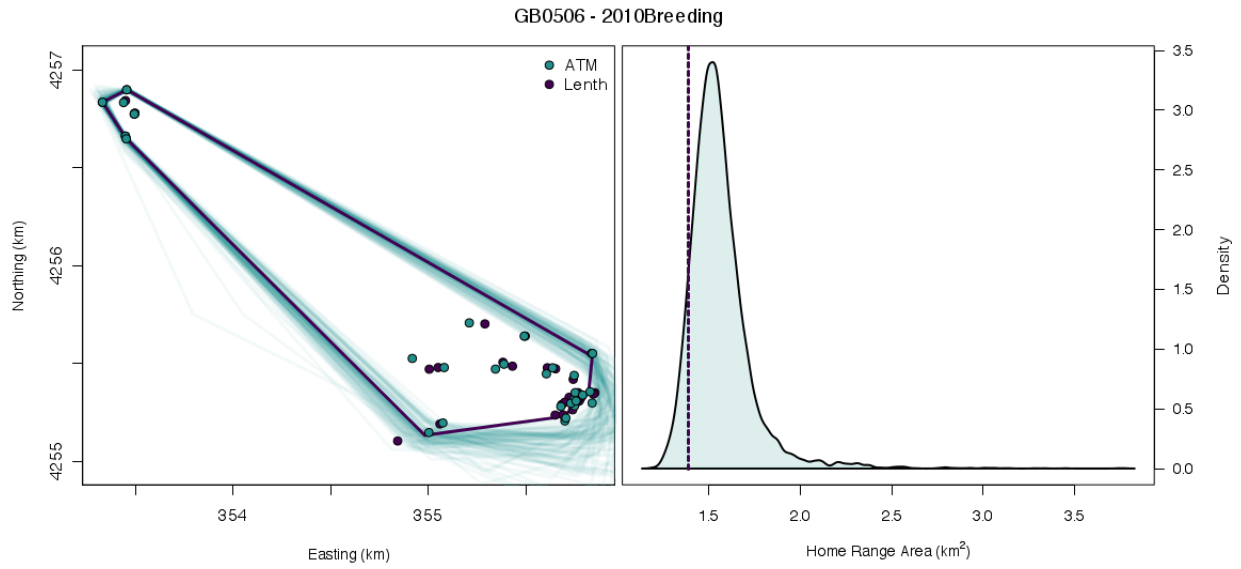

(a)

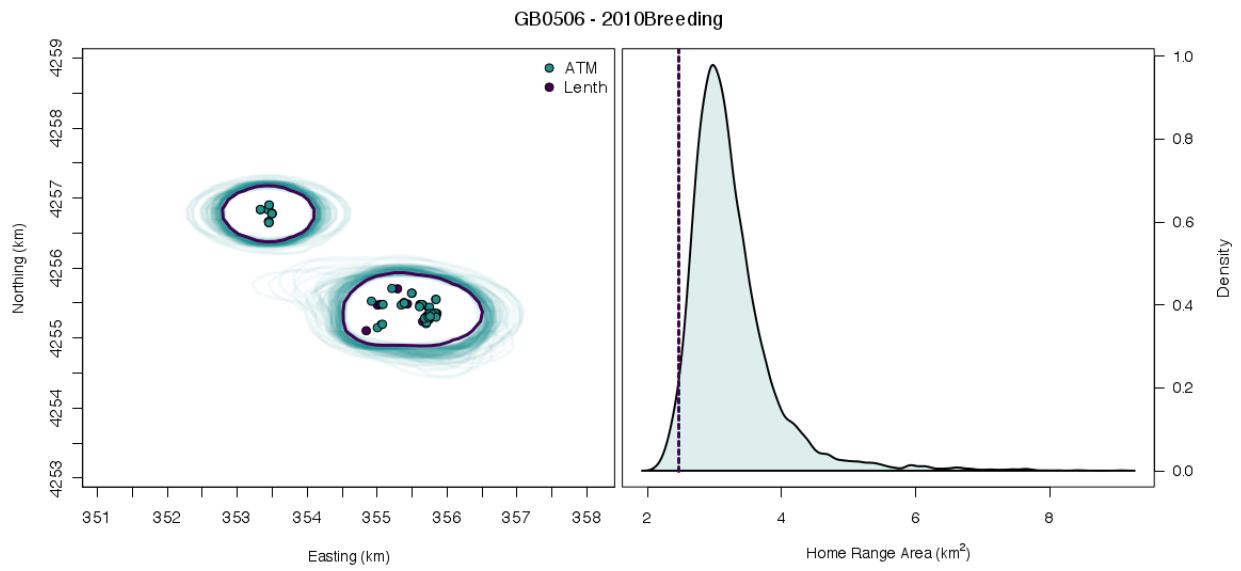

(b)

Figure 11

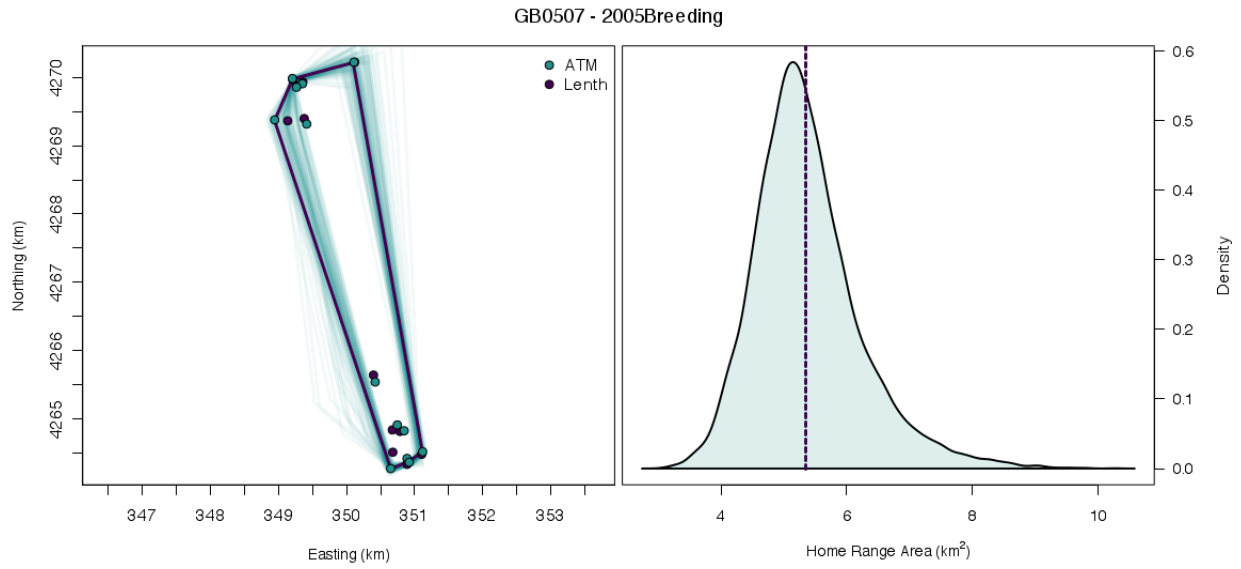

(a)

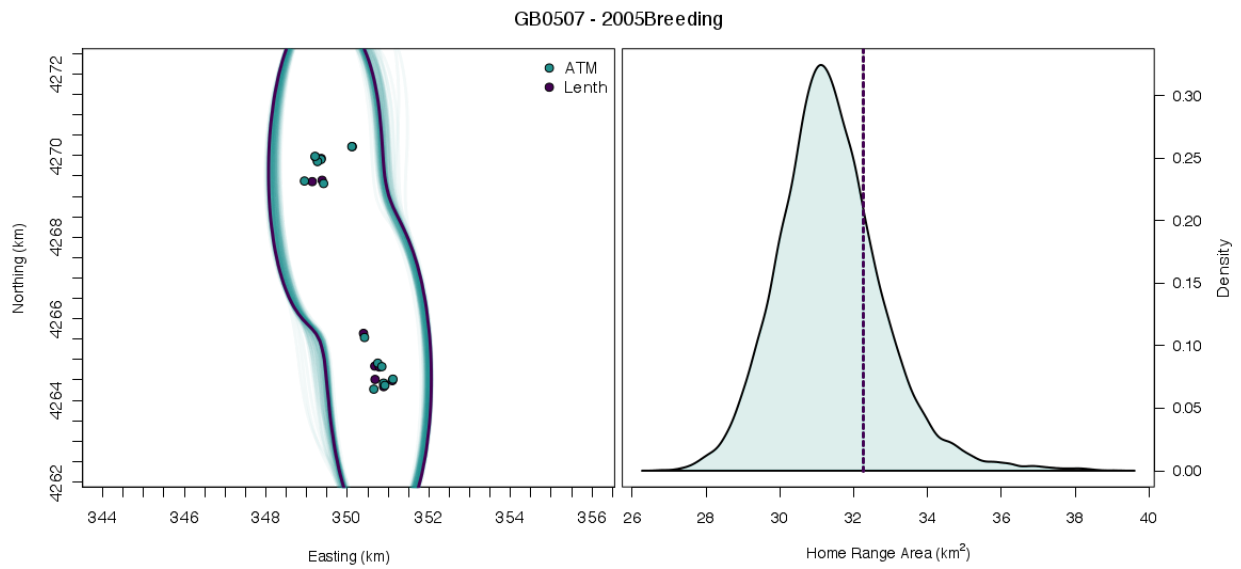

(b)

Figure 12

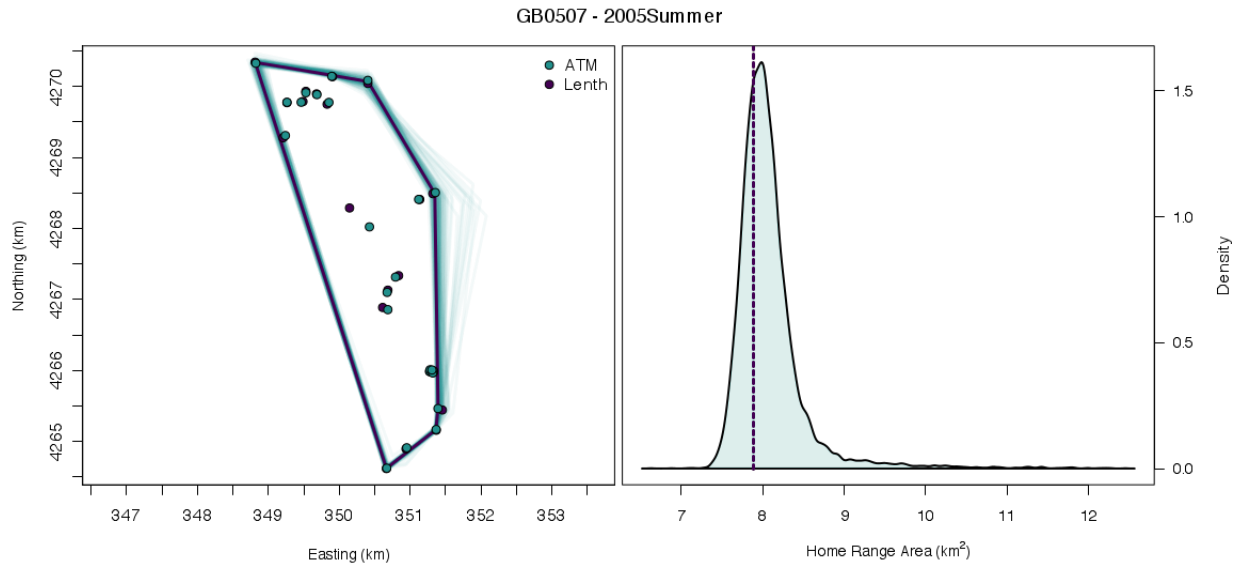

(a)

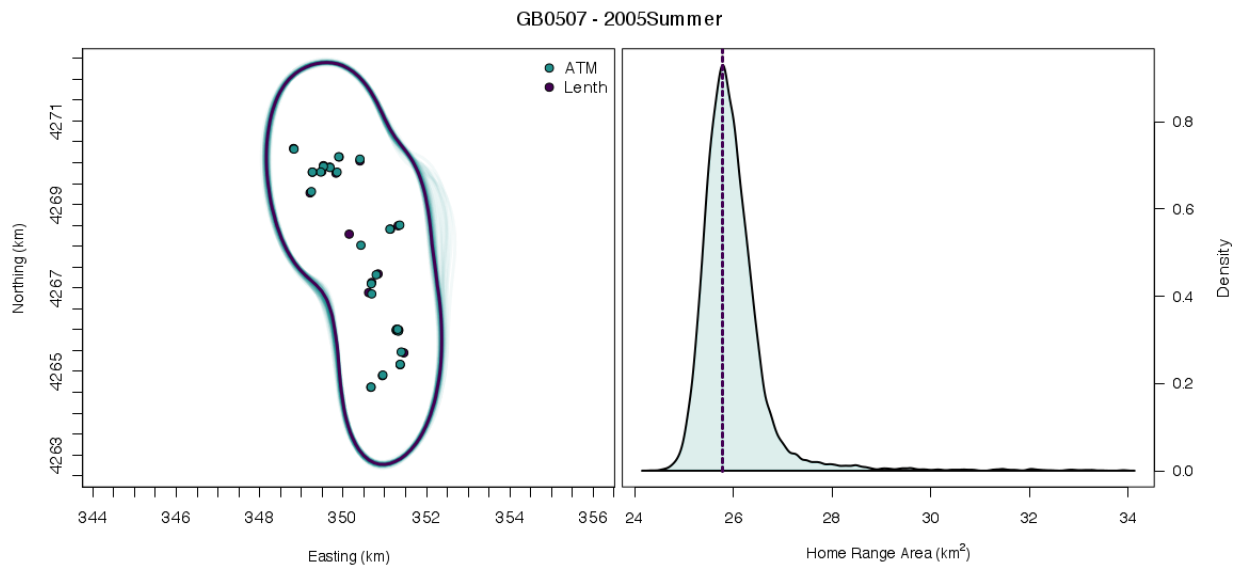

(b)

Figure 13

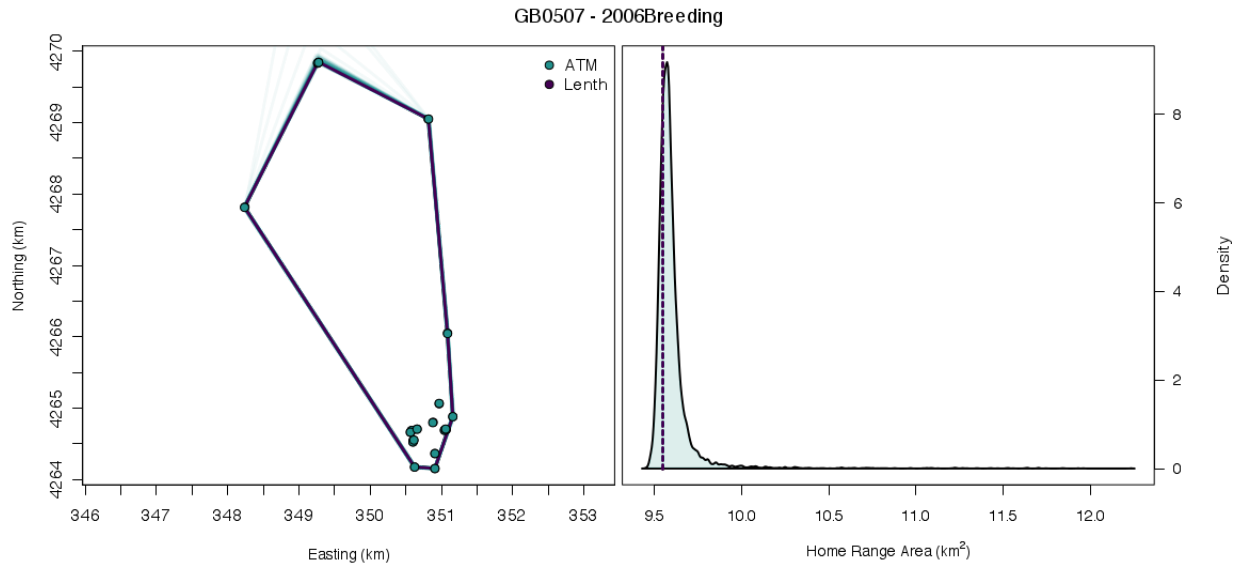

(a)

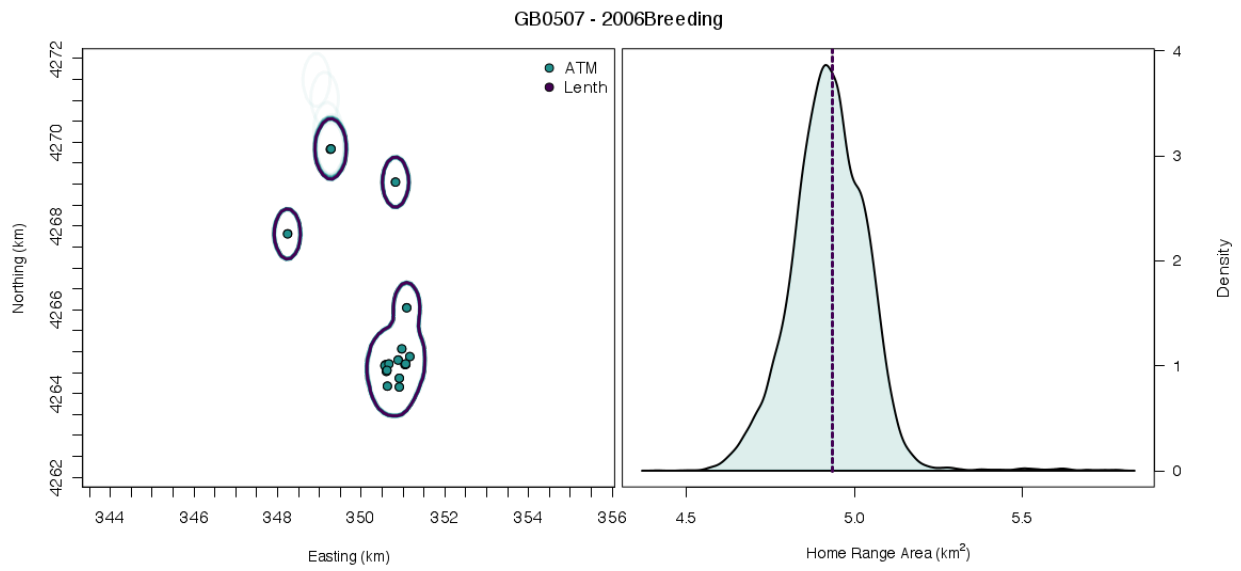

(b)

Figure 14

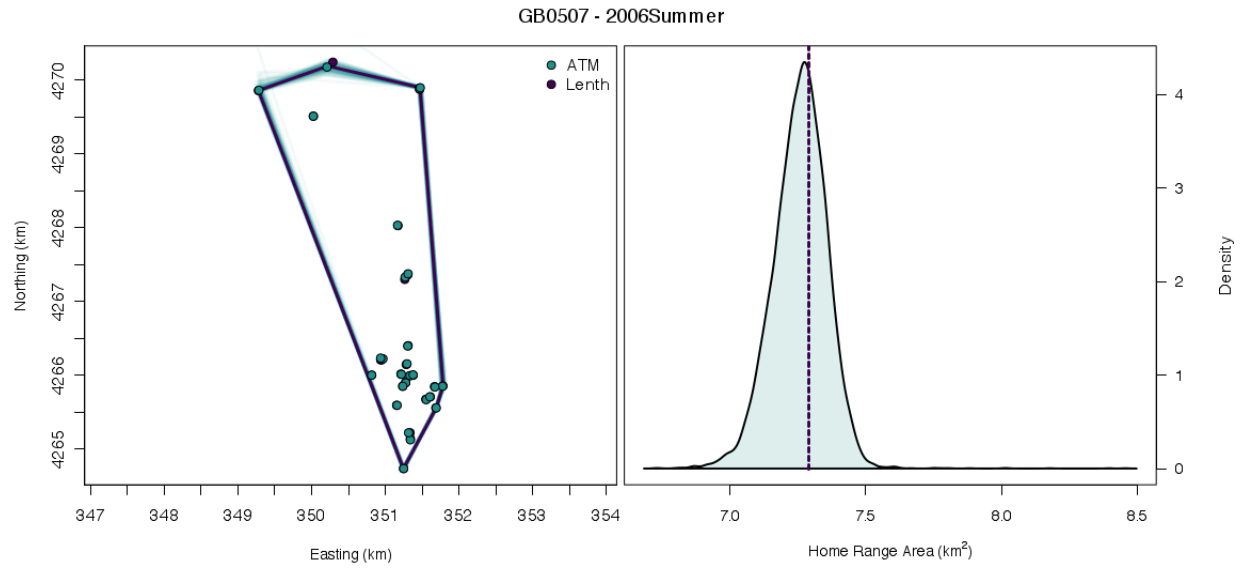

(a)

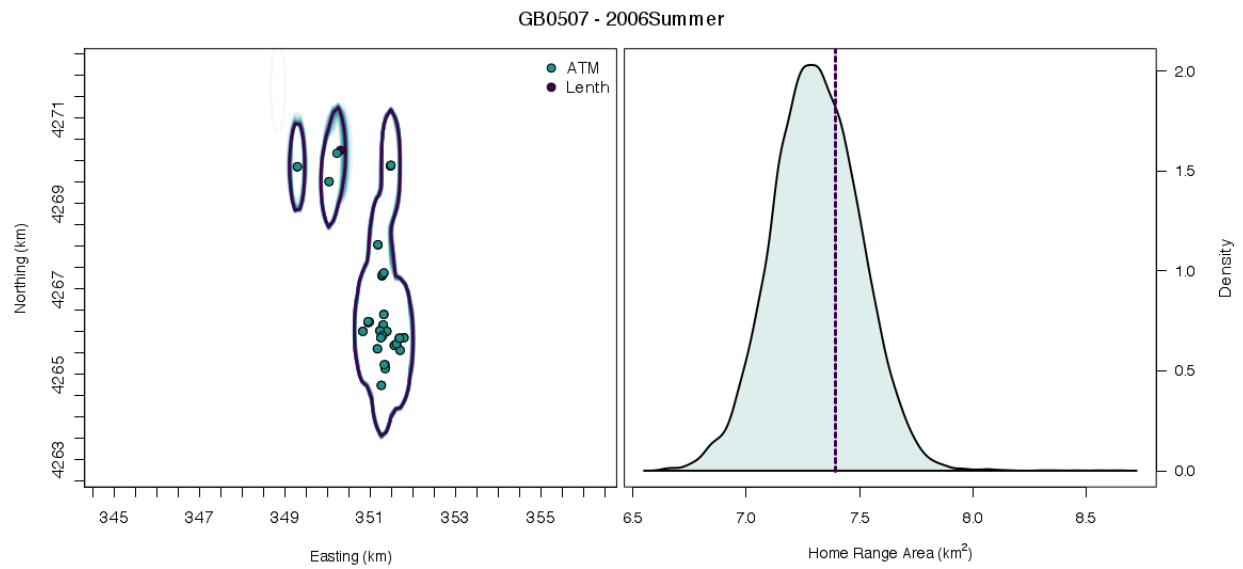

(b)

Figure 15



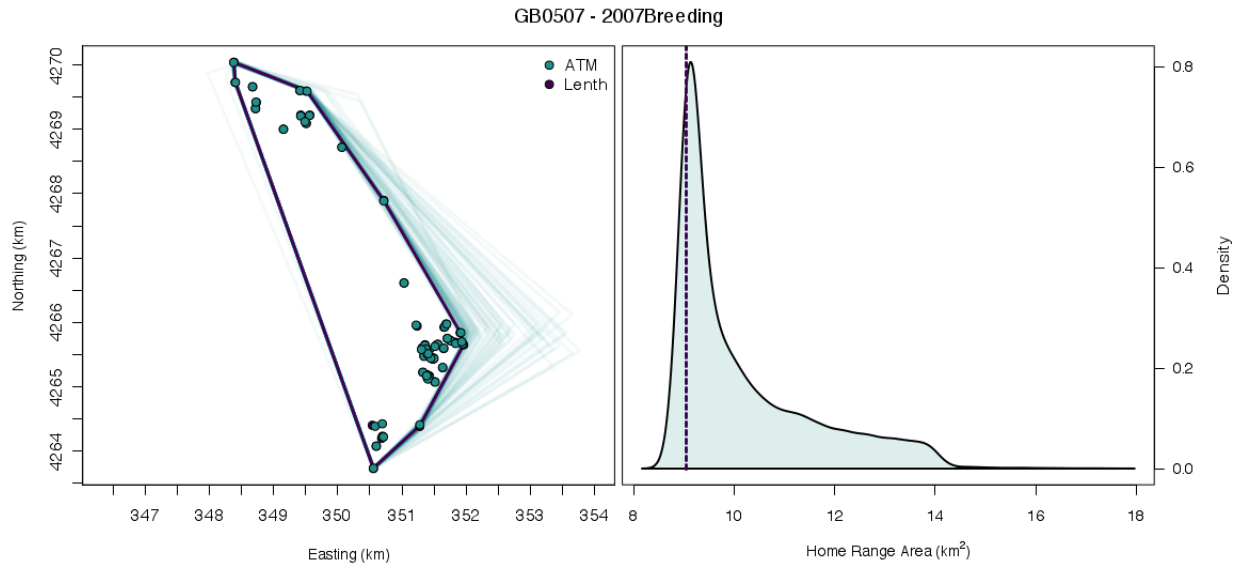

(a)

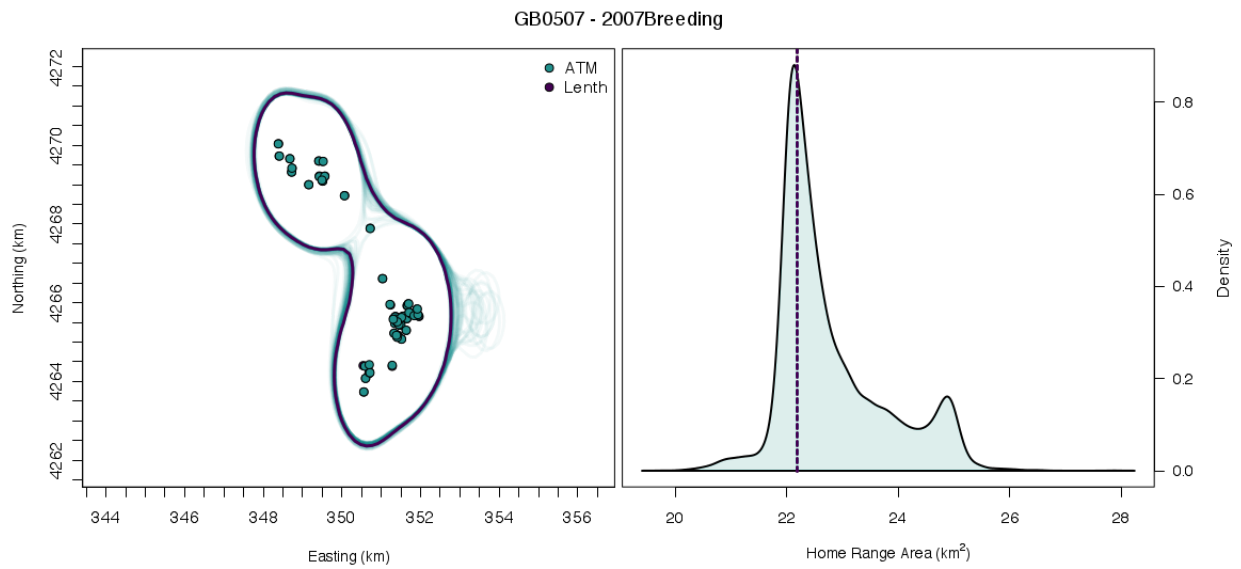

(b)

Figure 16

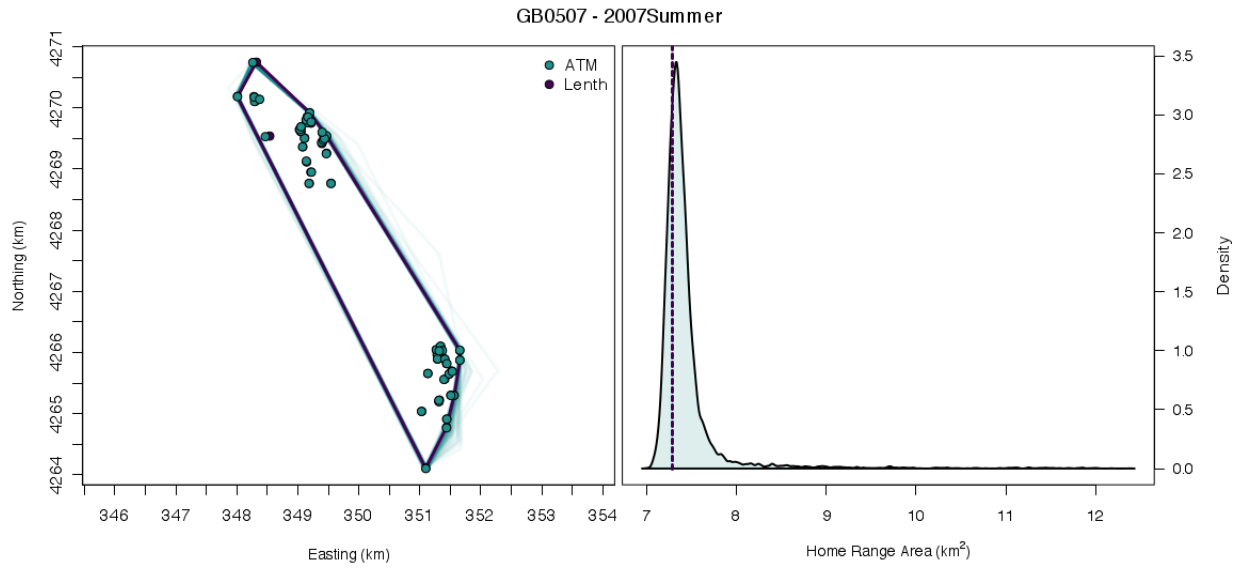

(a)

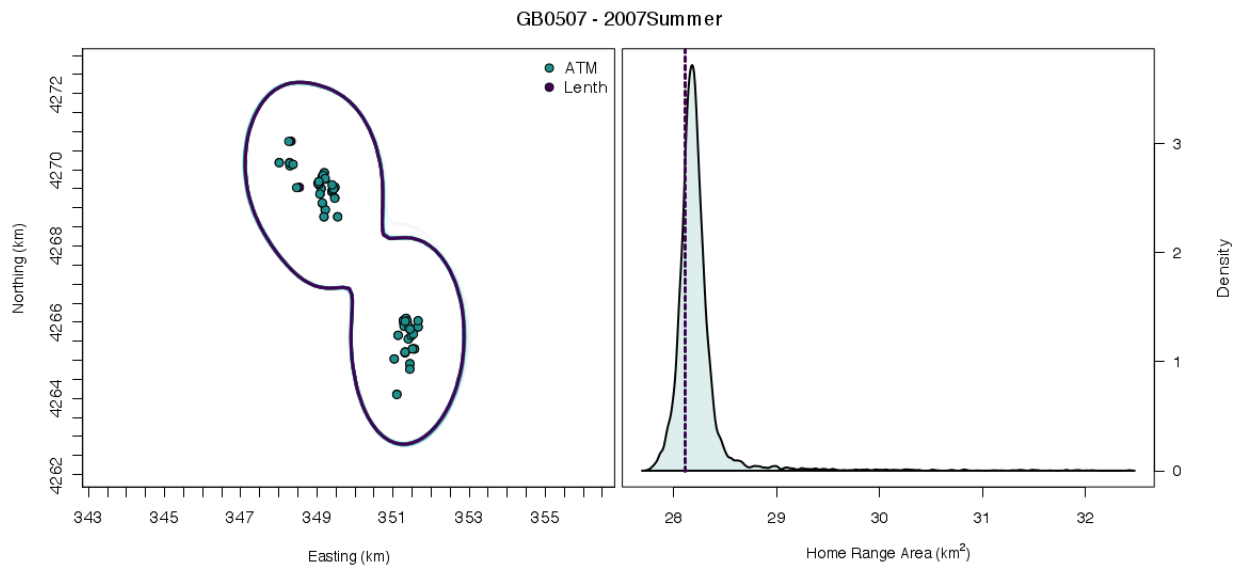

(b)

Figure 17

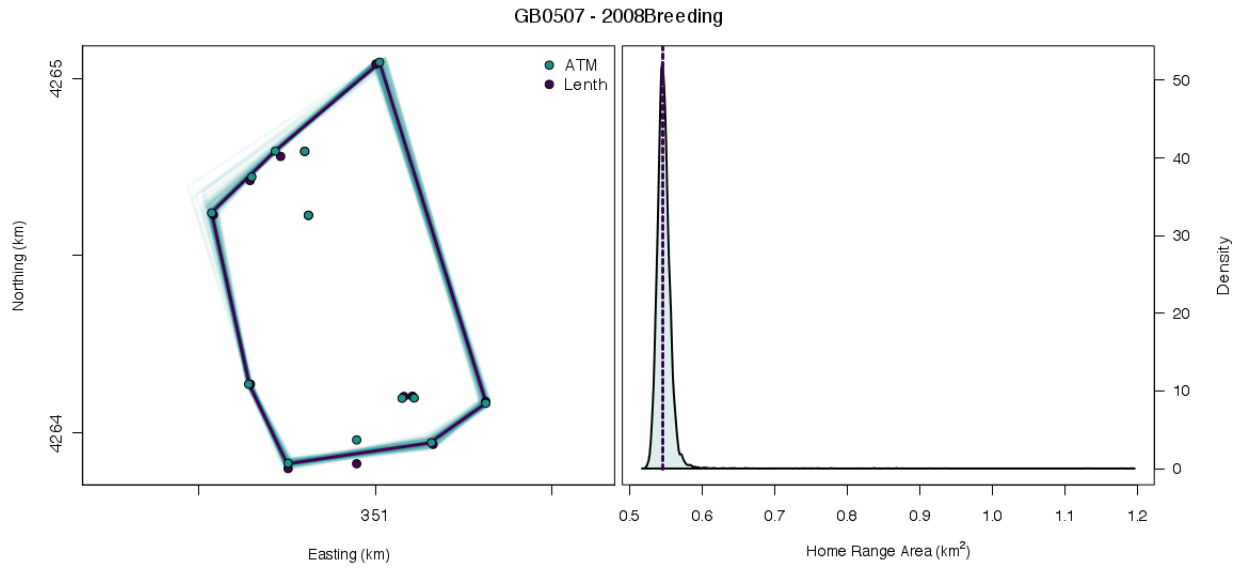

(a)

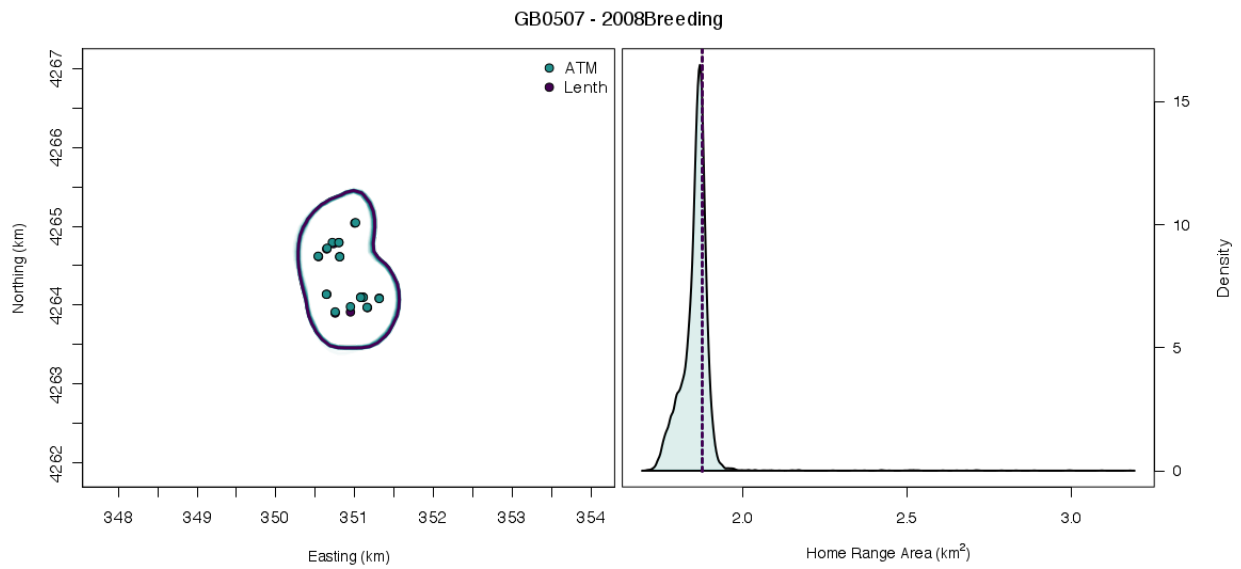

(b)

Figure 18

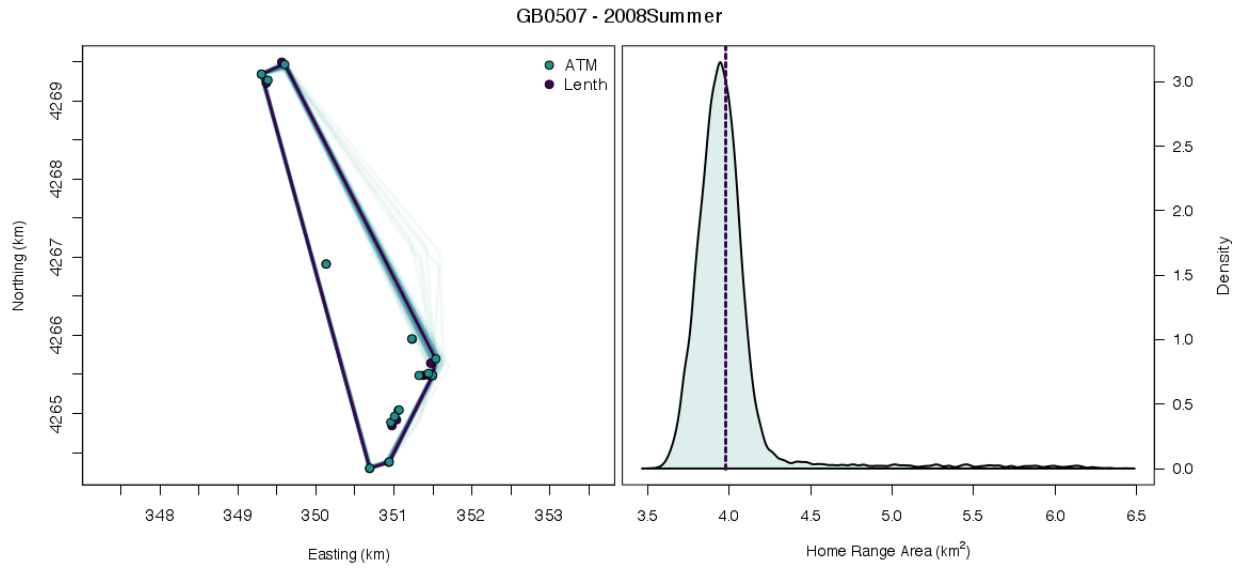

(a)

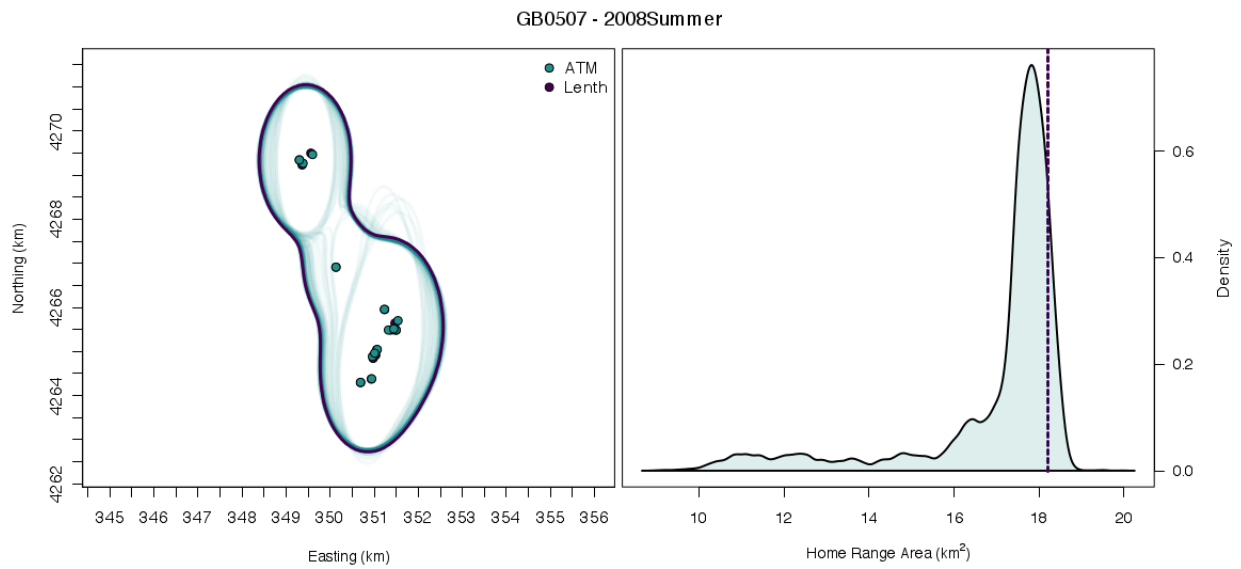

(b)

Figure 19

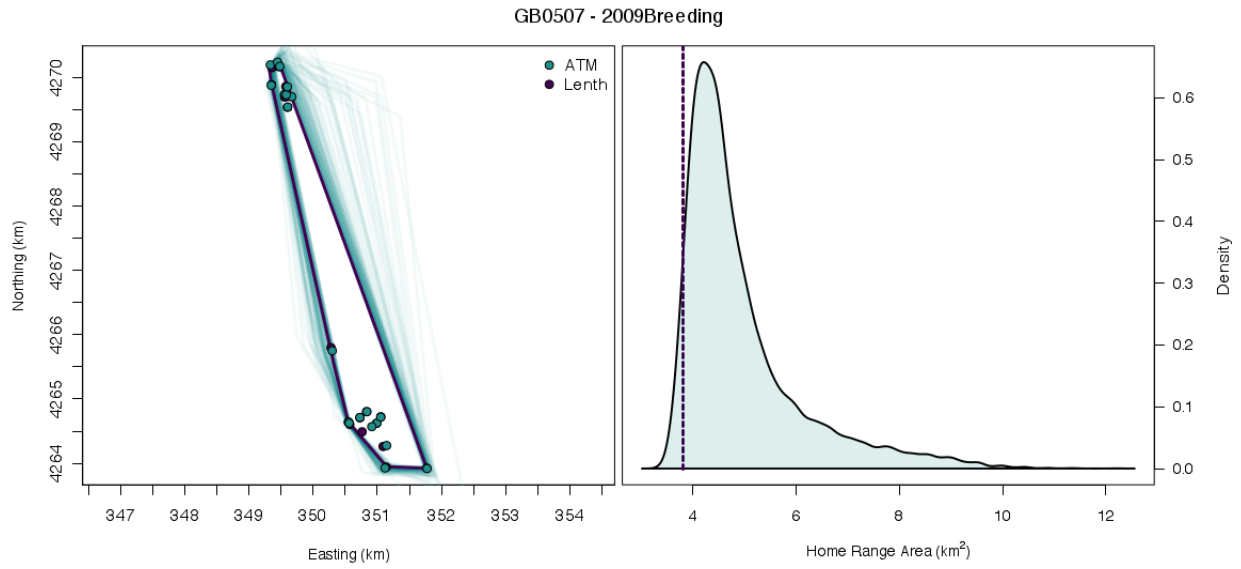

(a)

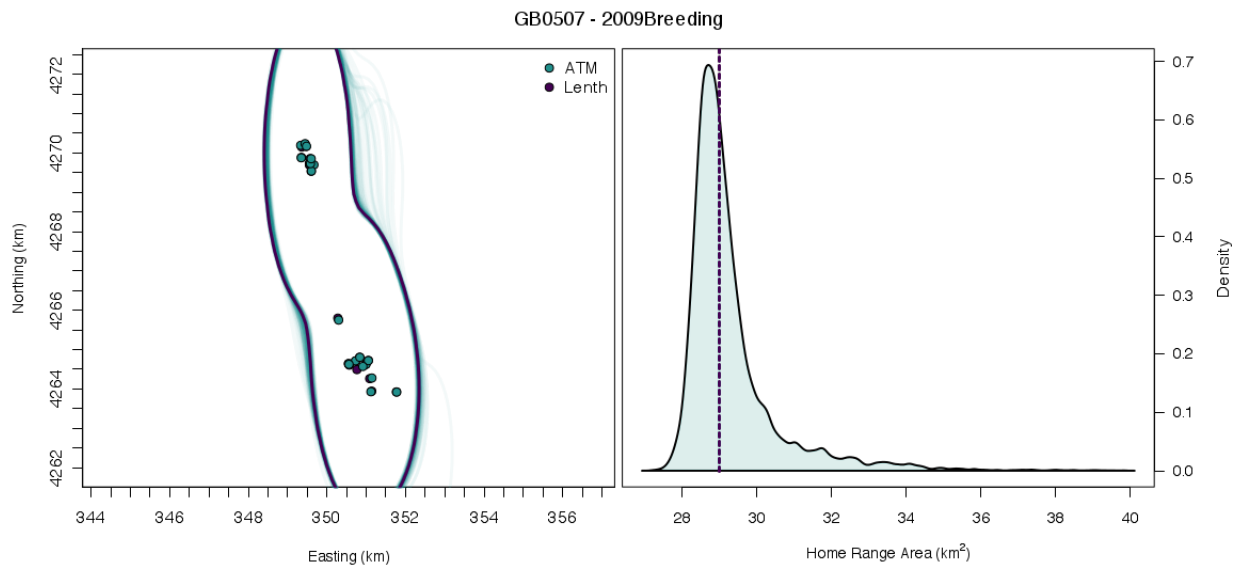

(b)

Figure 20

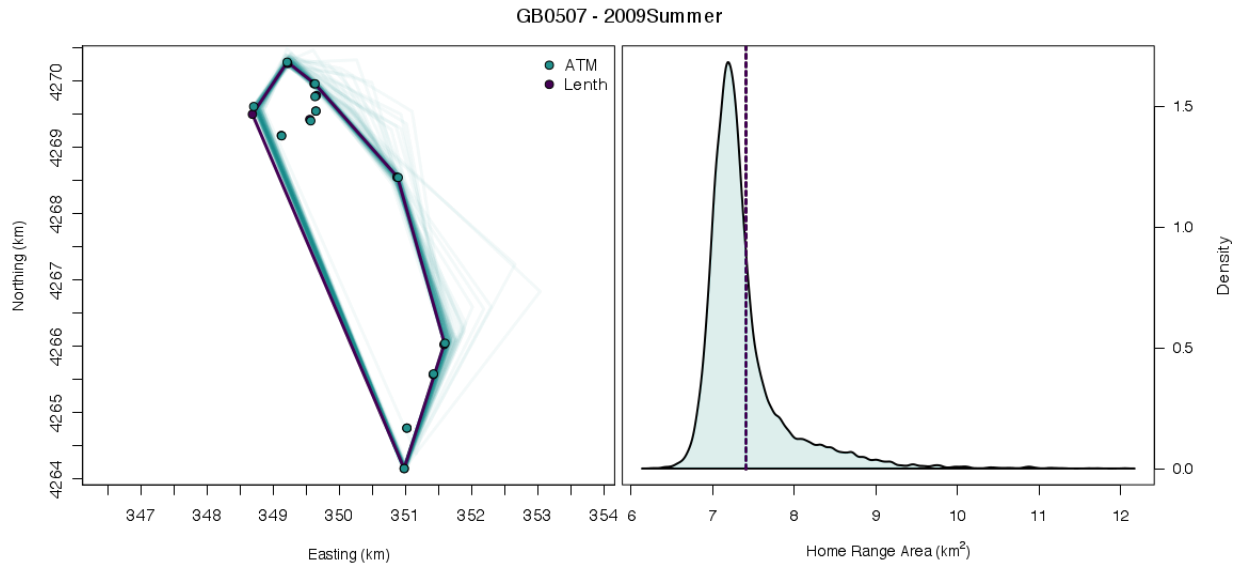

(a)

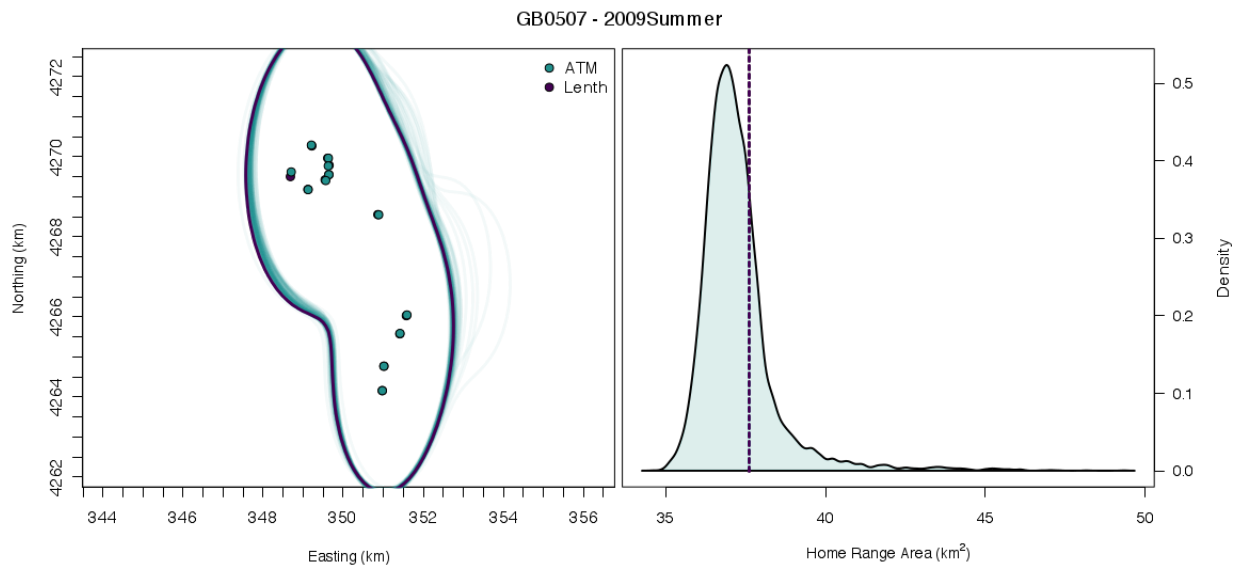

(b)

Figure 21

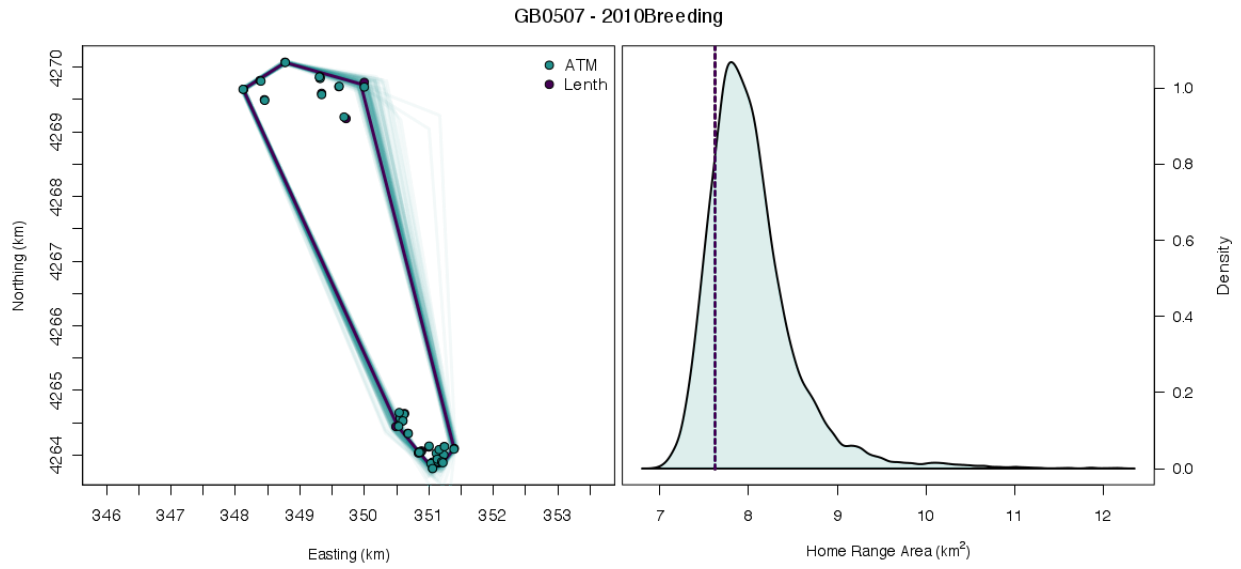

(a)

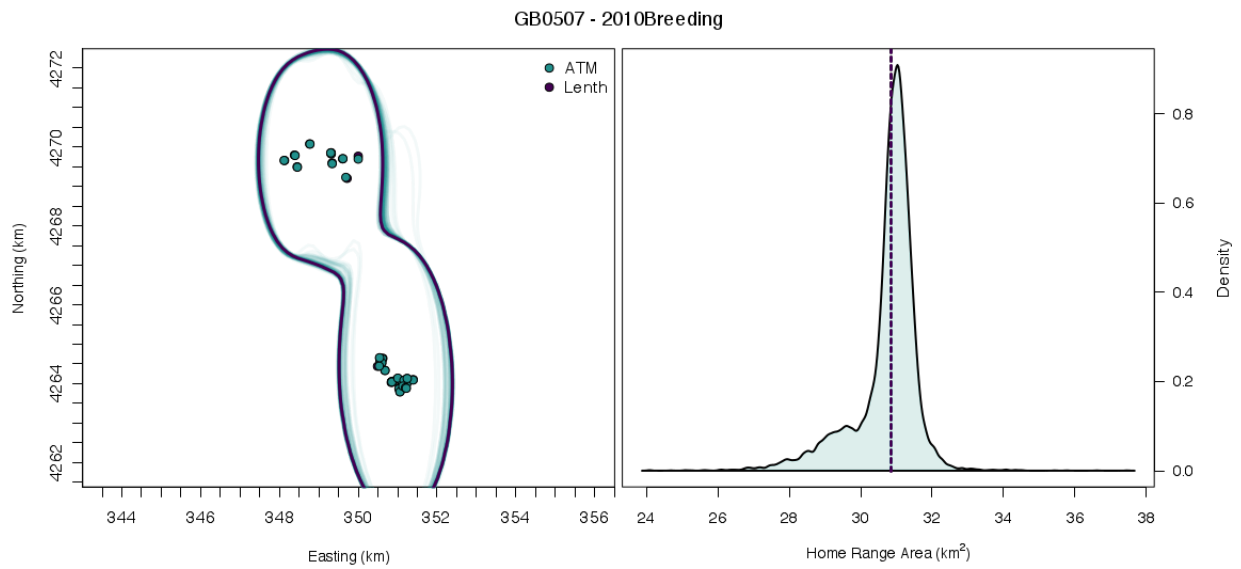

(b)

Figure 22

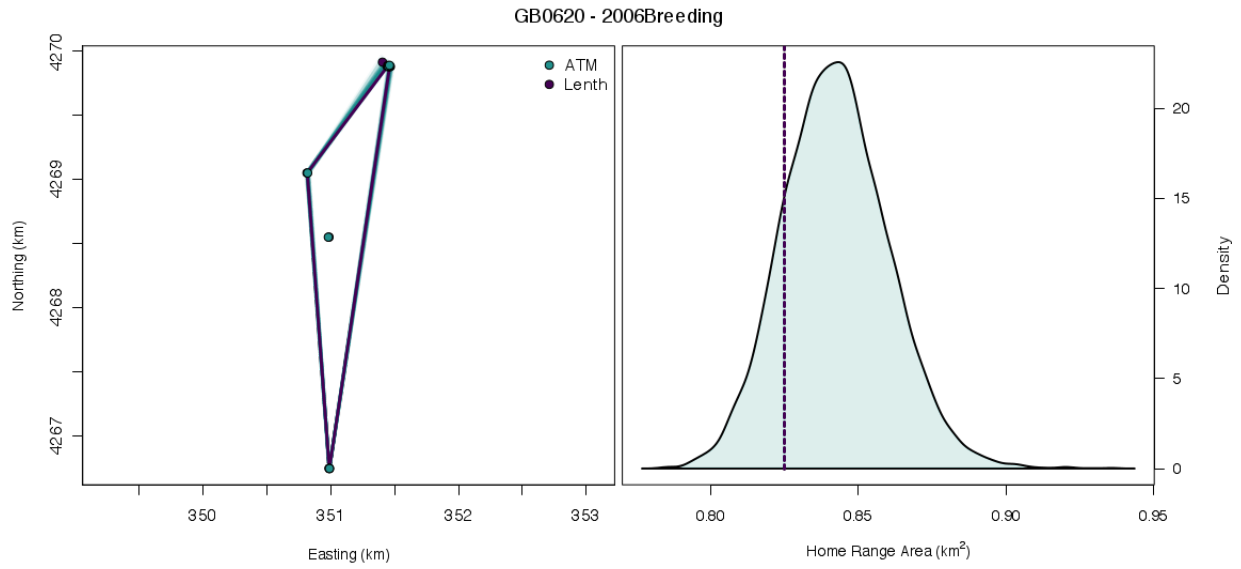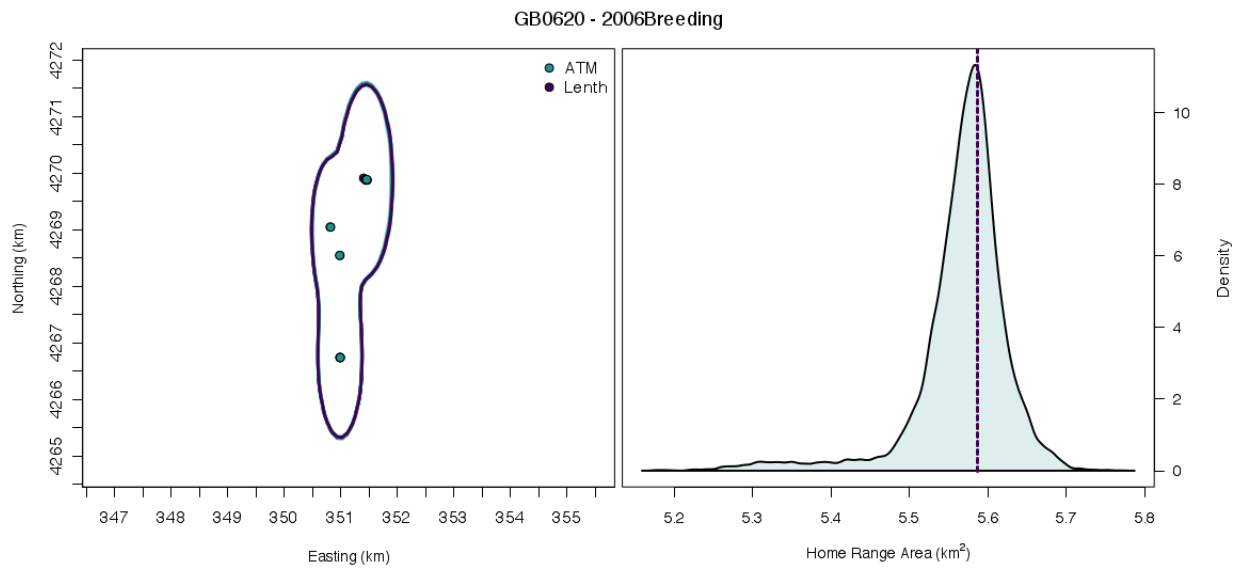

Figure 23



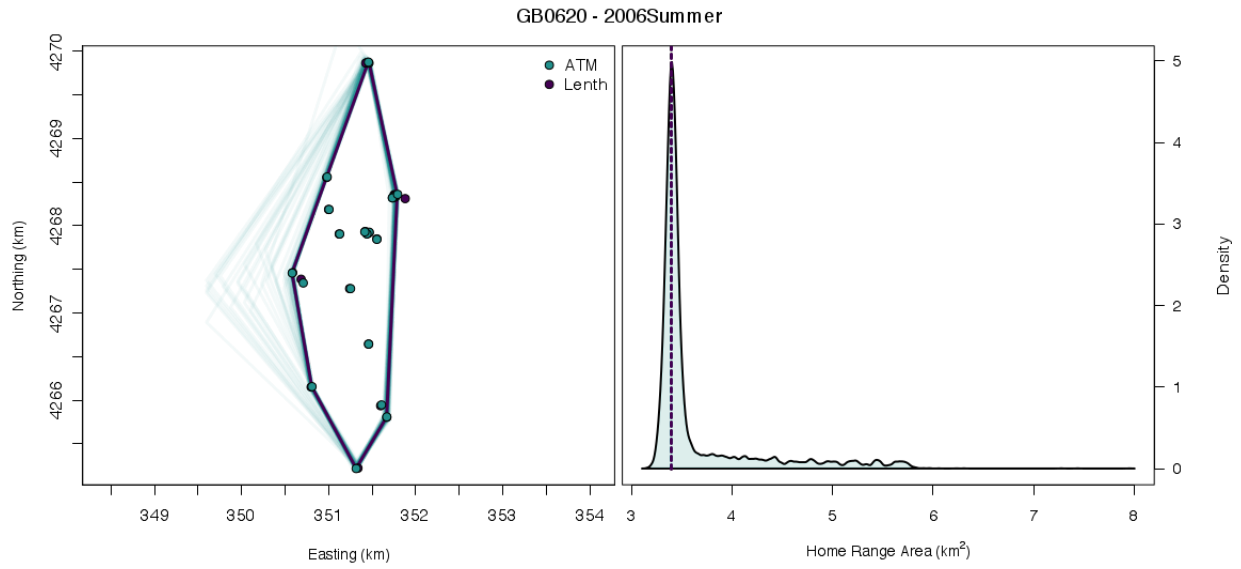

(a)

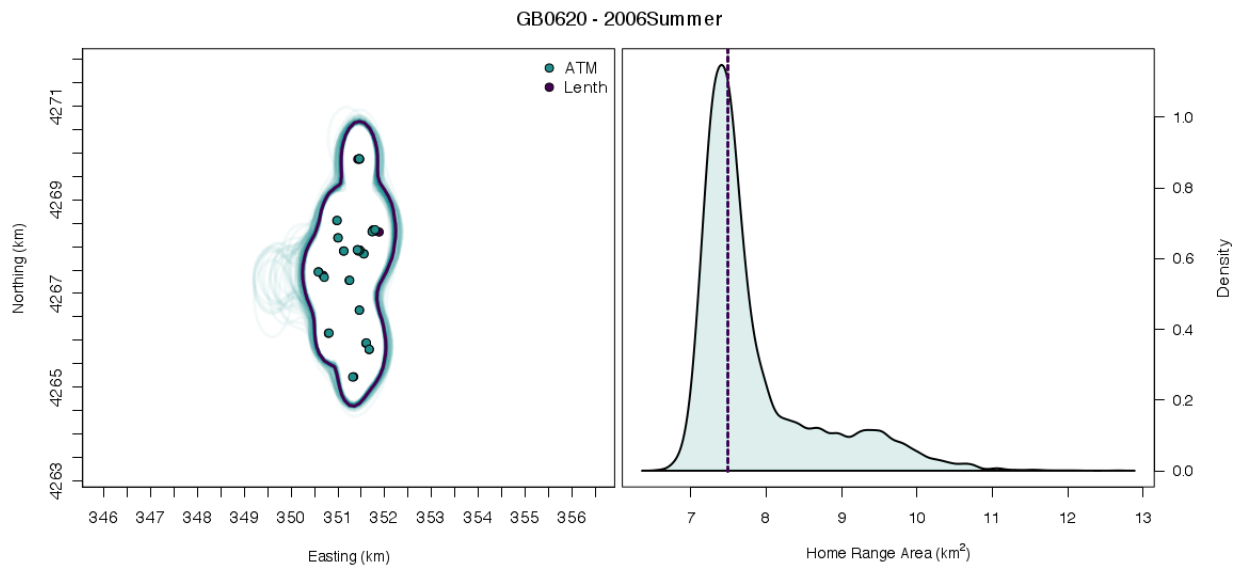

(b)

Figure 24

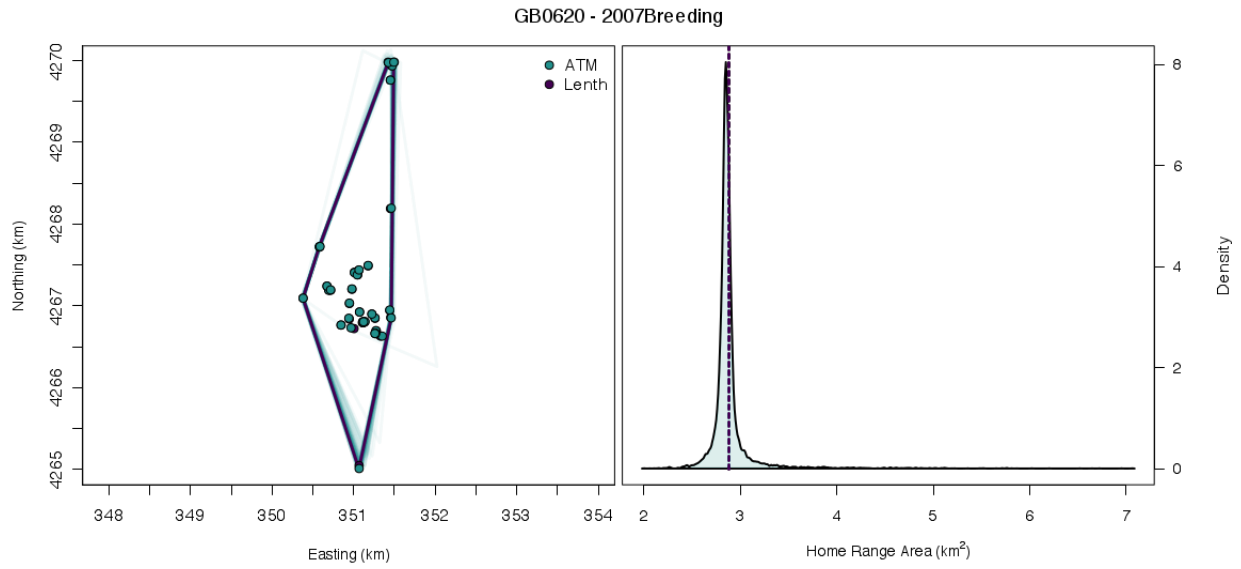

(a)

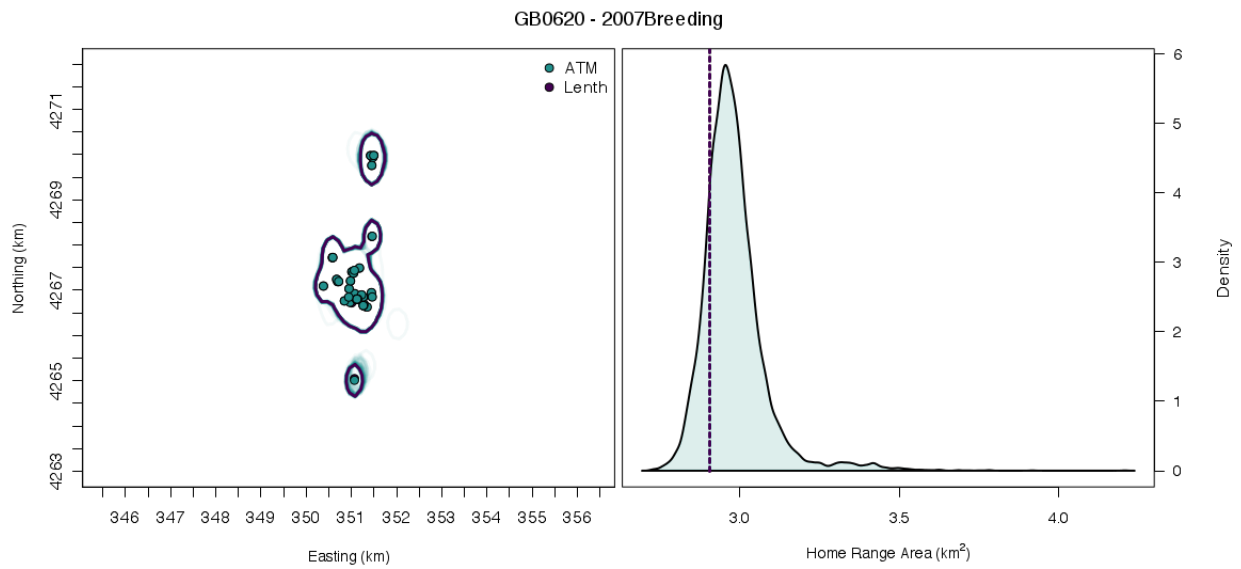

(b)

Figure 25

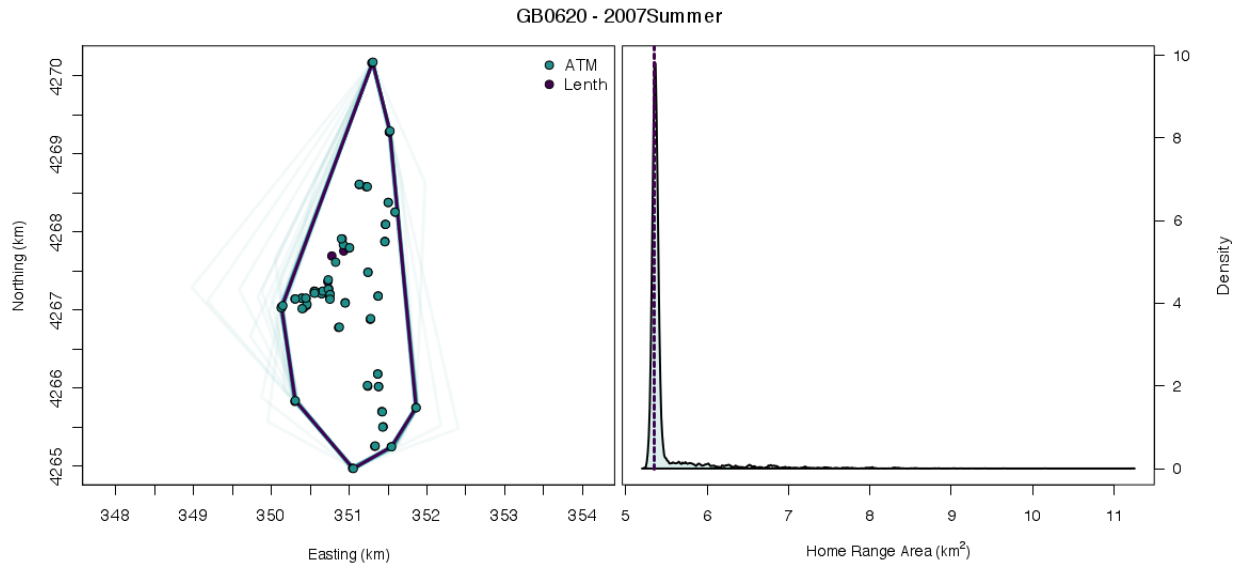

(a)

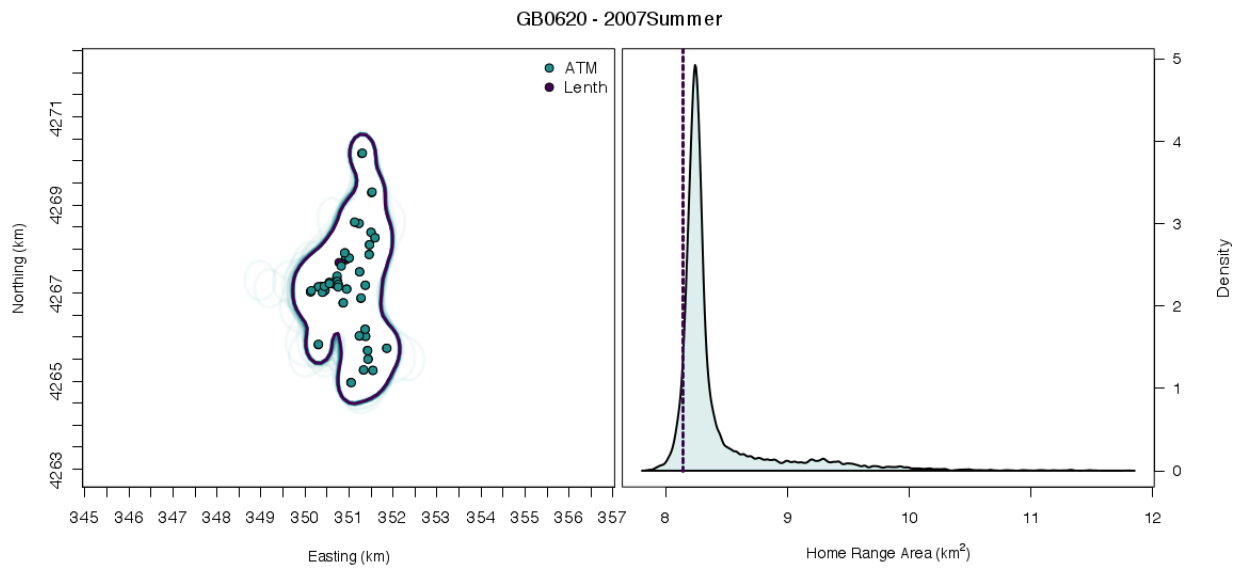

(b)

Figure 26

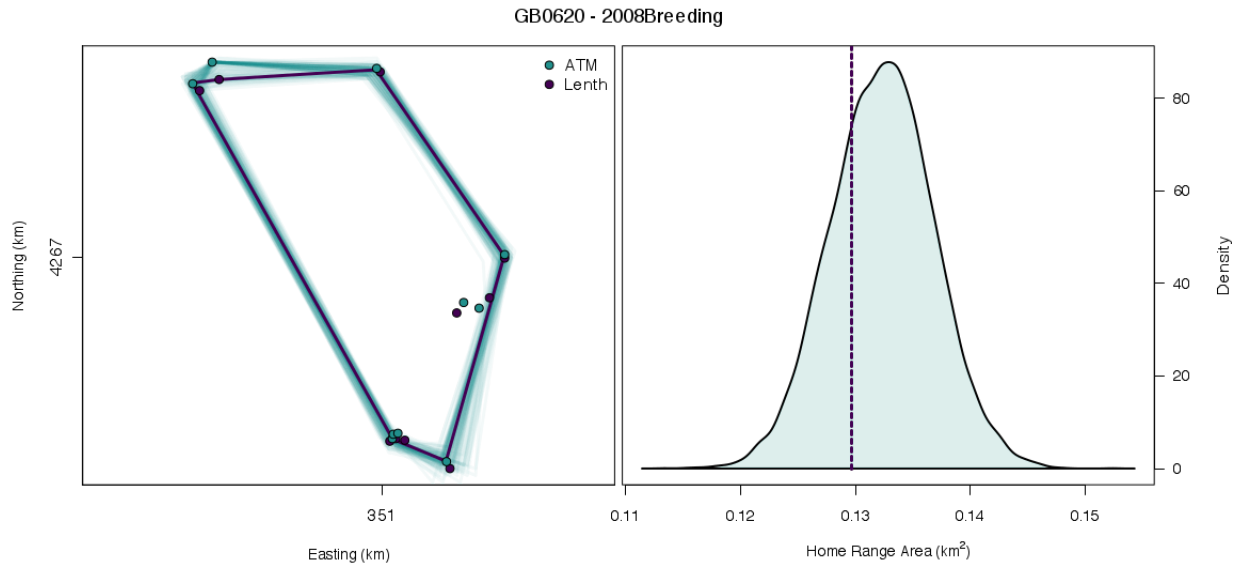

(a)

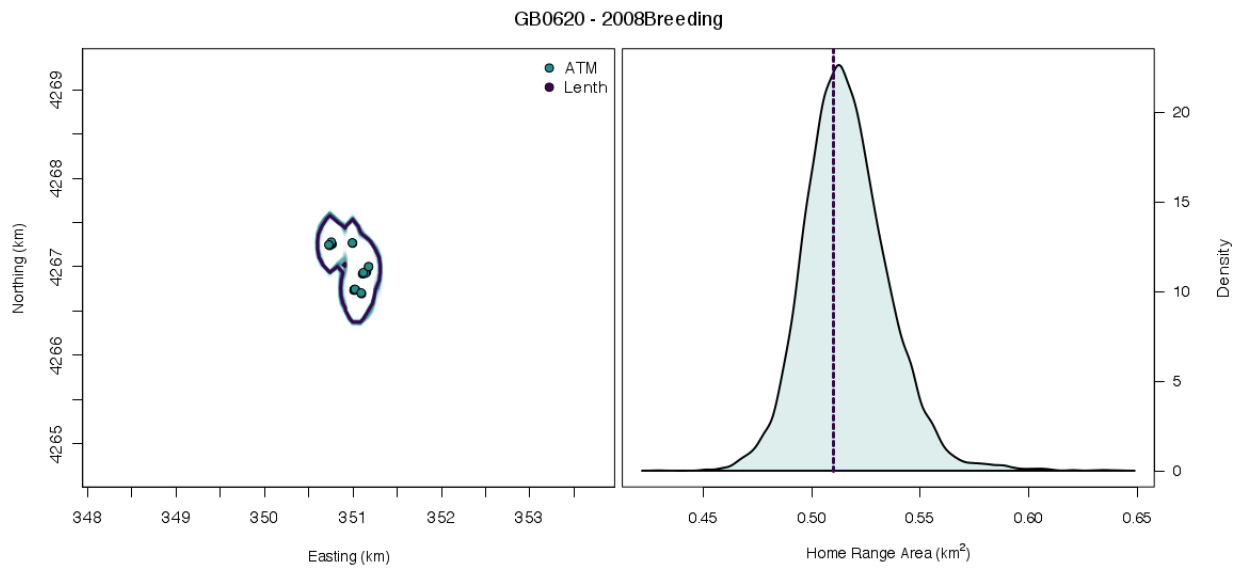

(b)

Figure 27

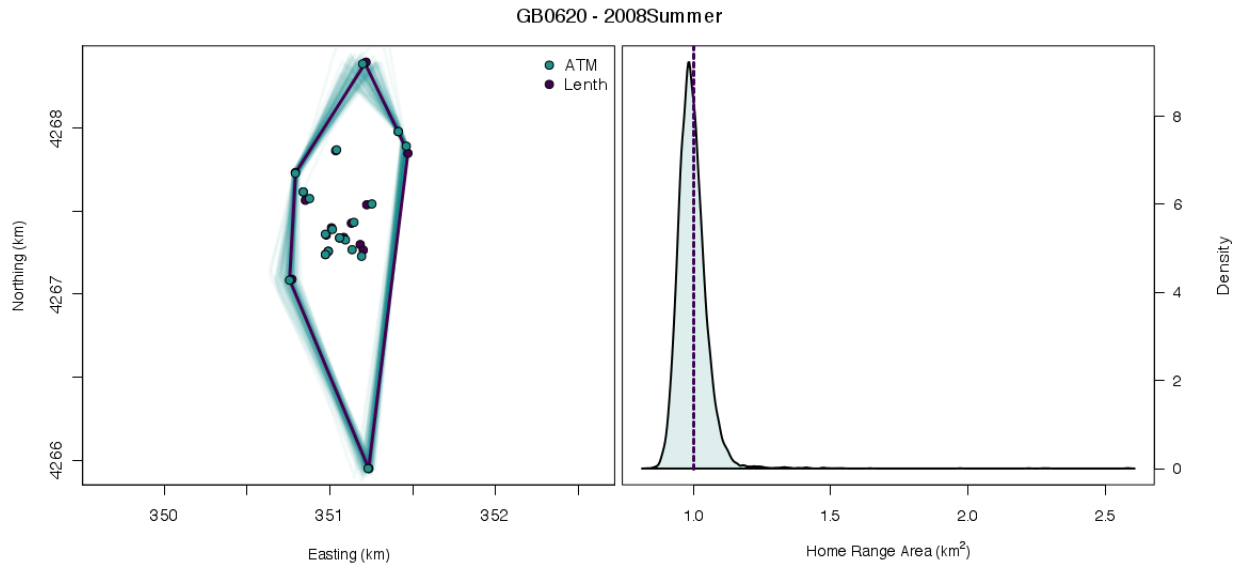

(a)

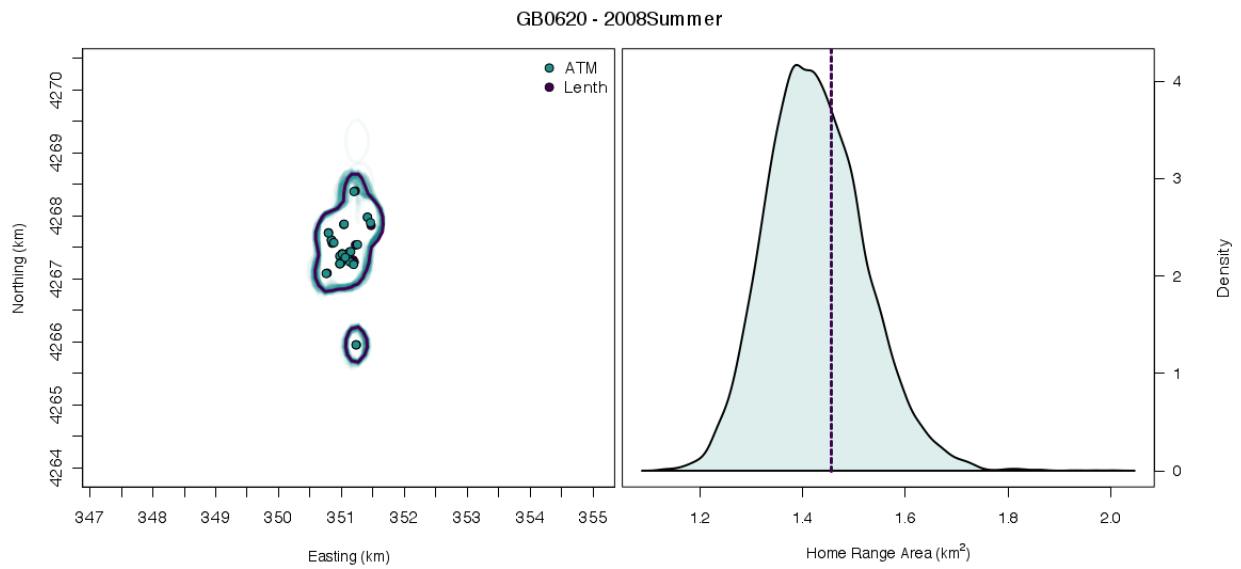

(b)

Figure 28

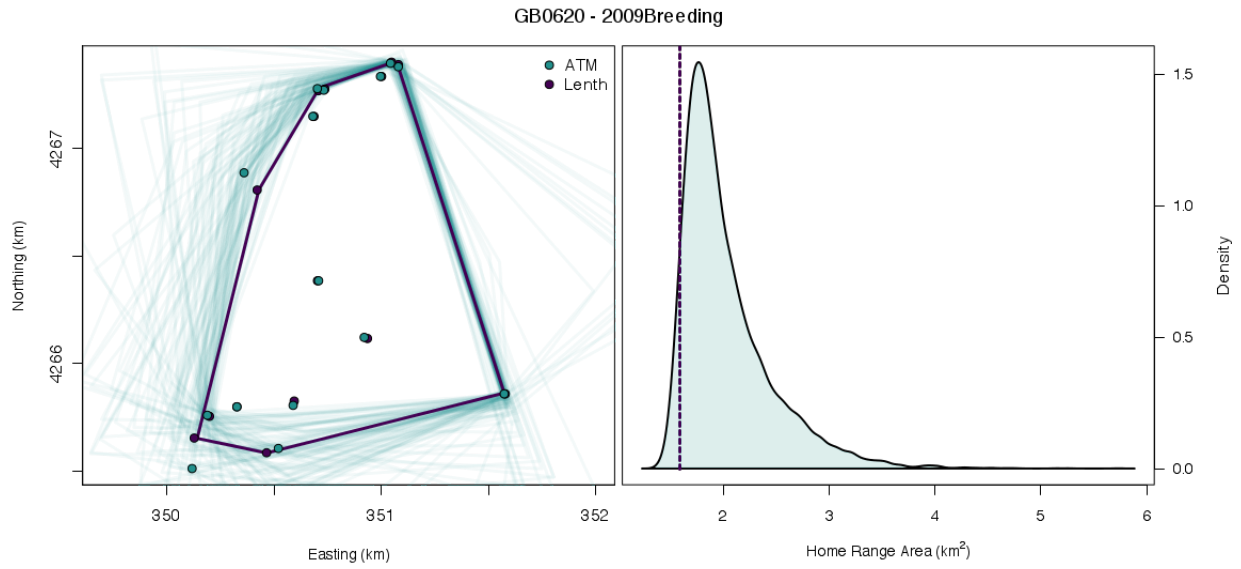

(a)

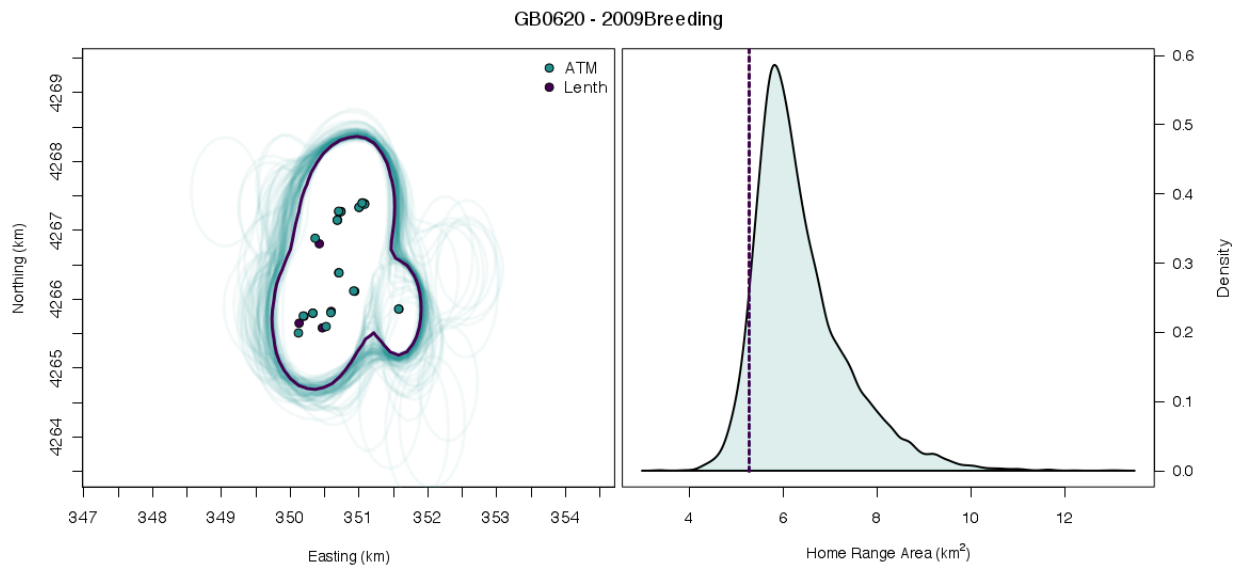

(b)

Figure 29

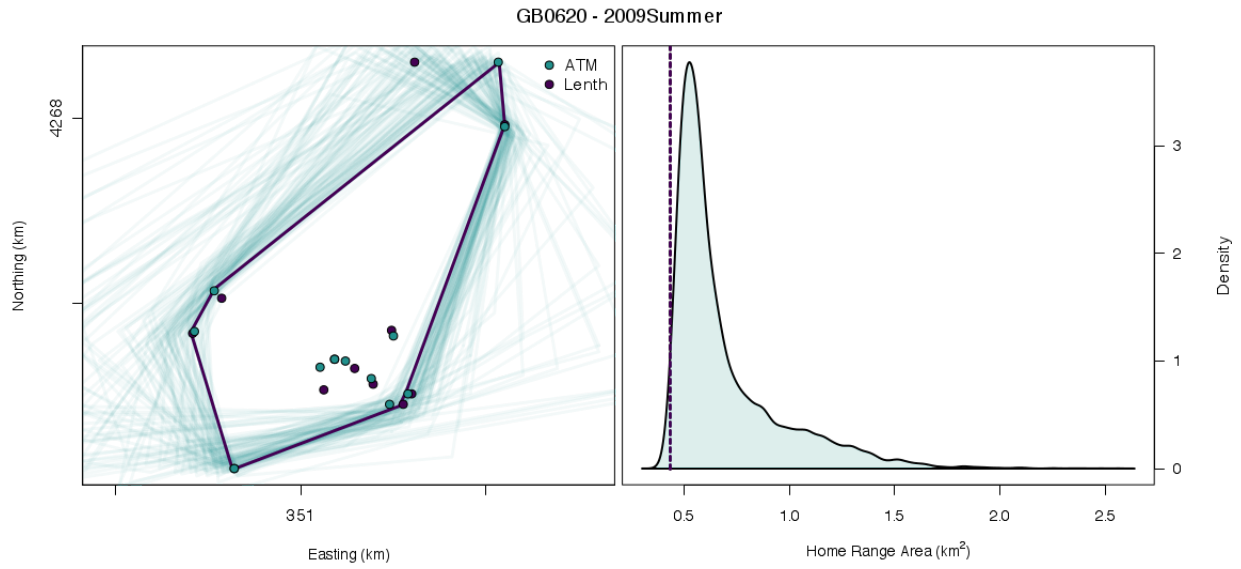

(a)

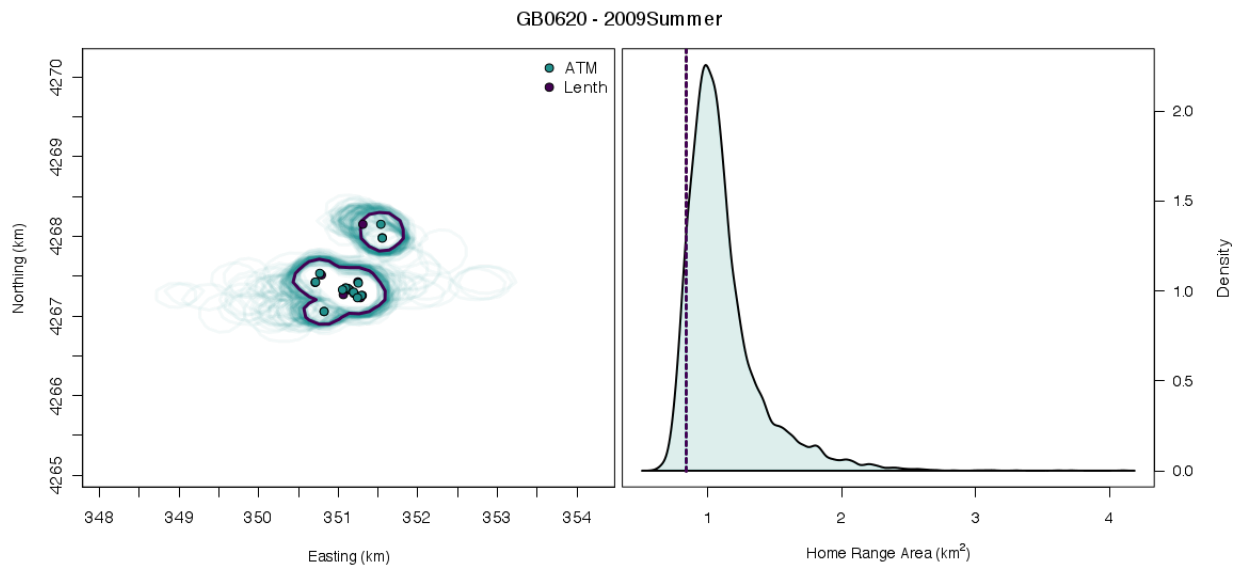

(b)

Figure 30

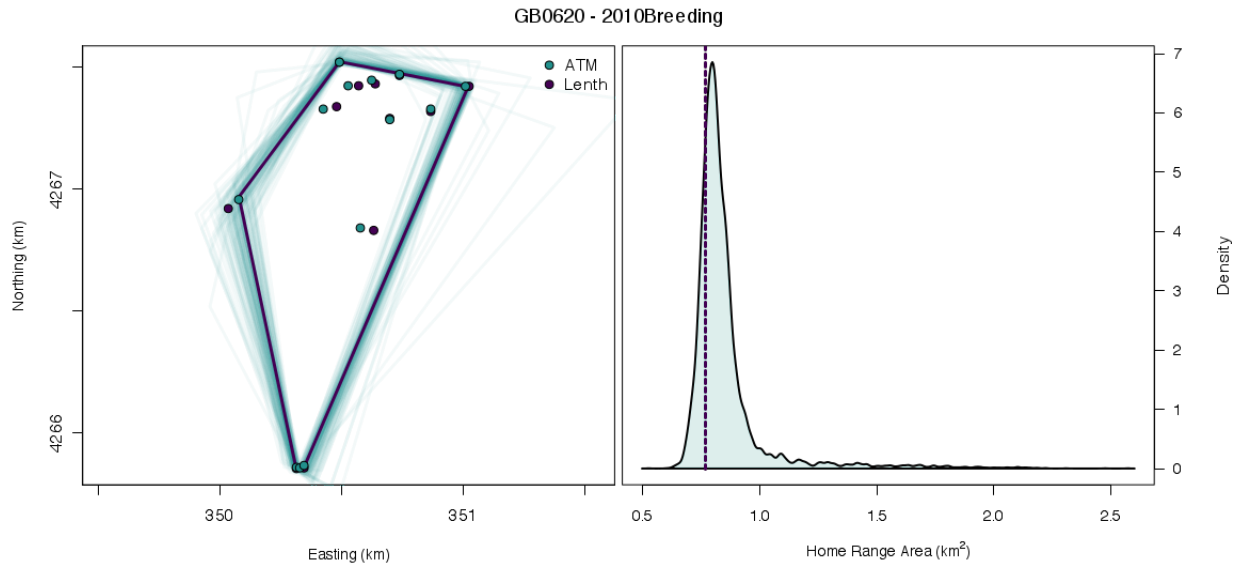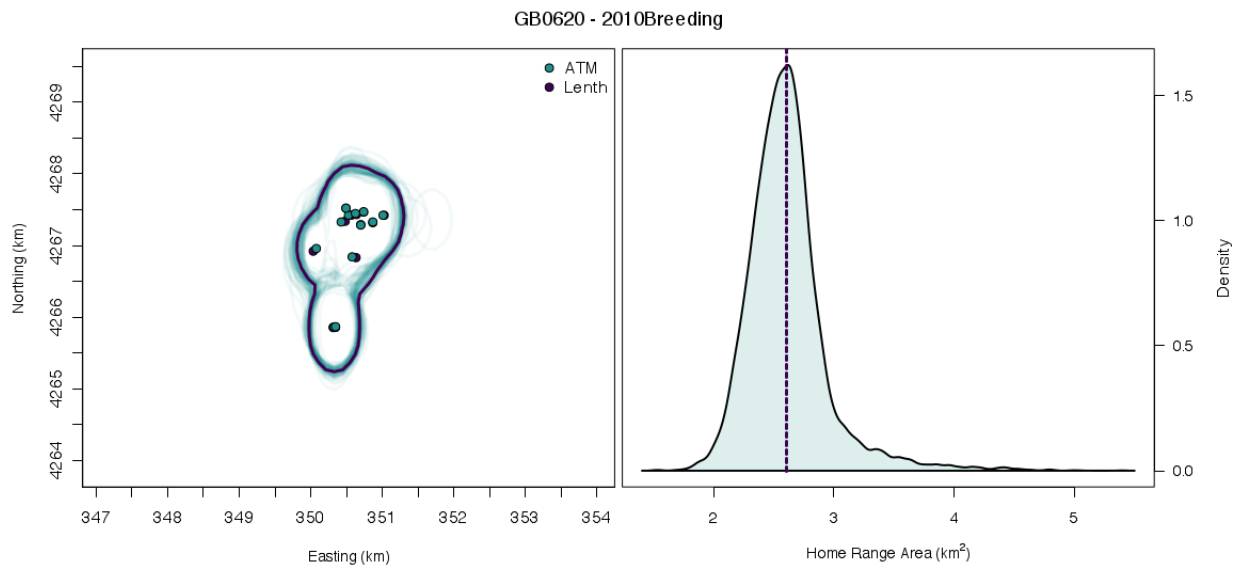

Figure 31



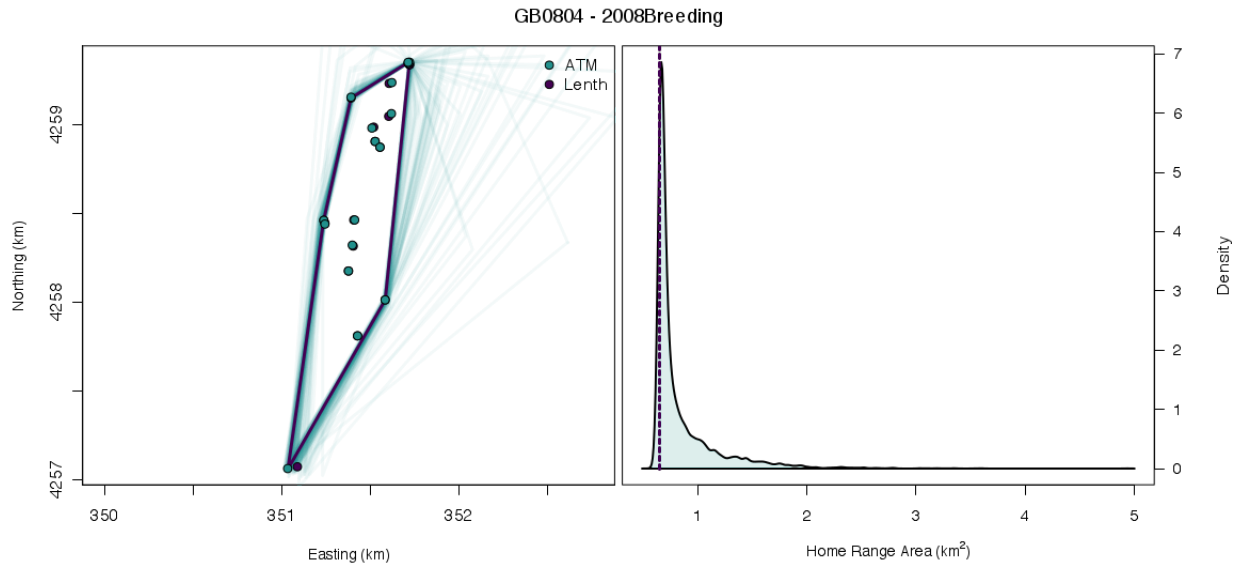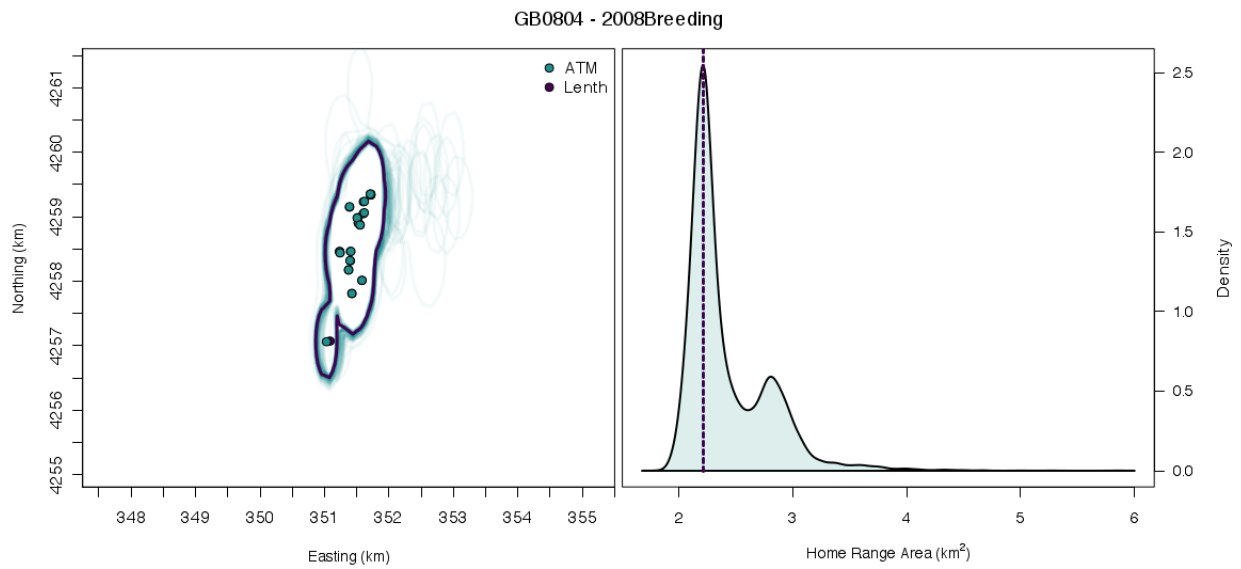

Figure 32

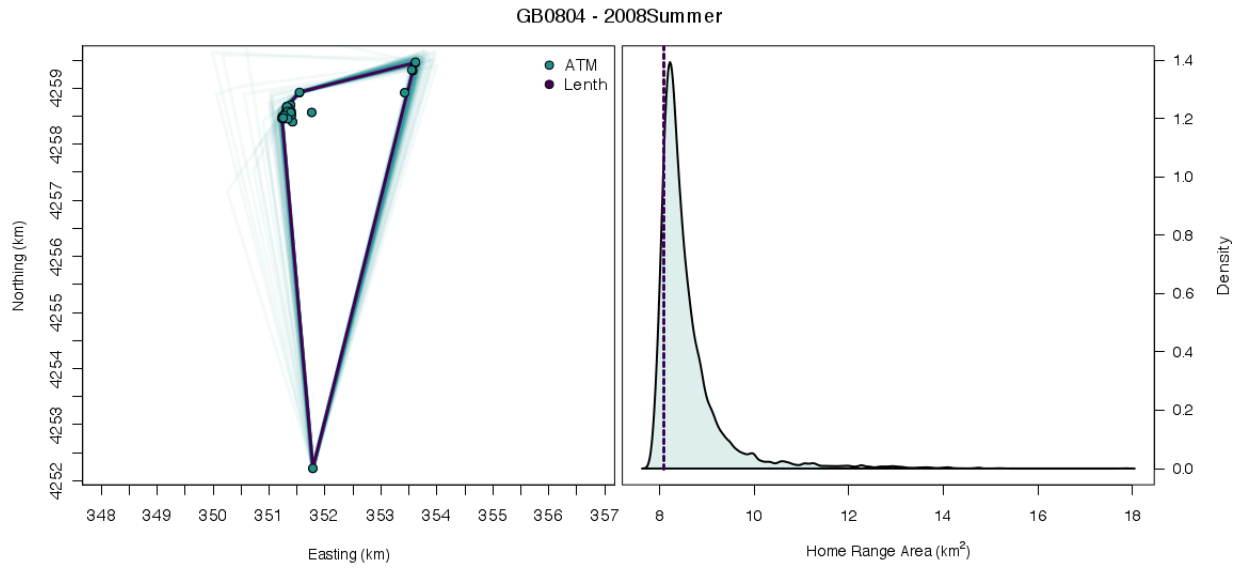

(a)

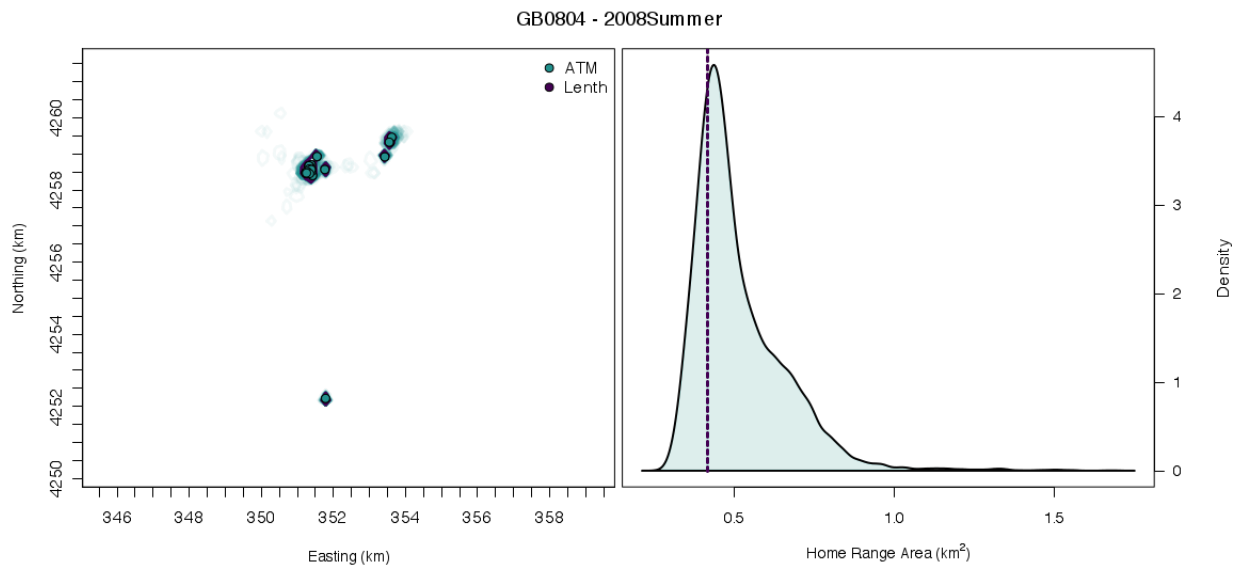

(b)

Figure 33

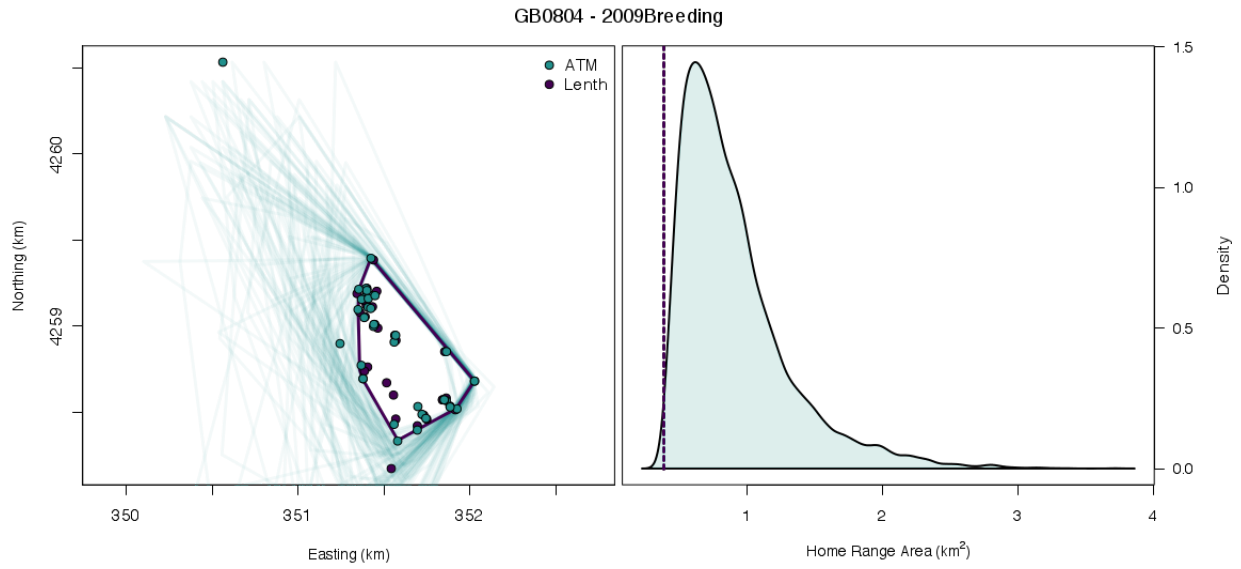

(a)

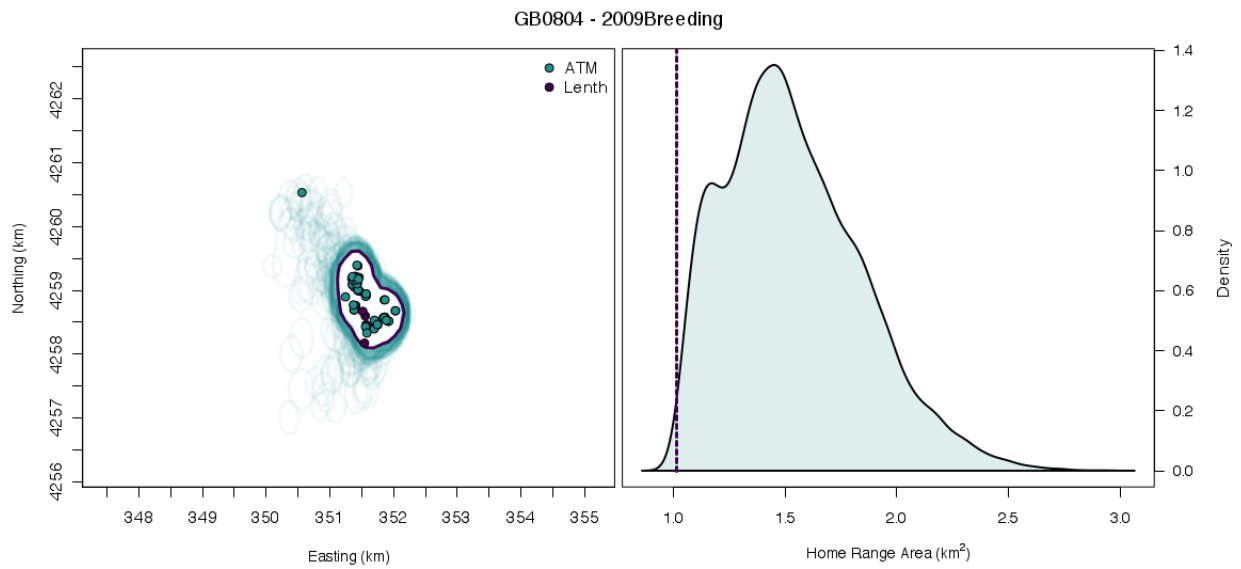

(b)

Figure 34

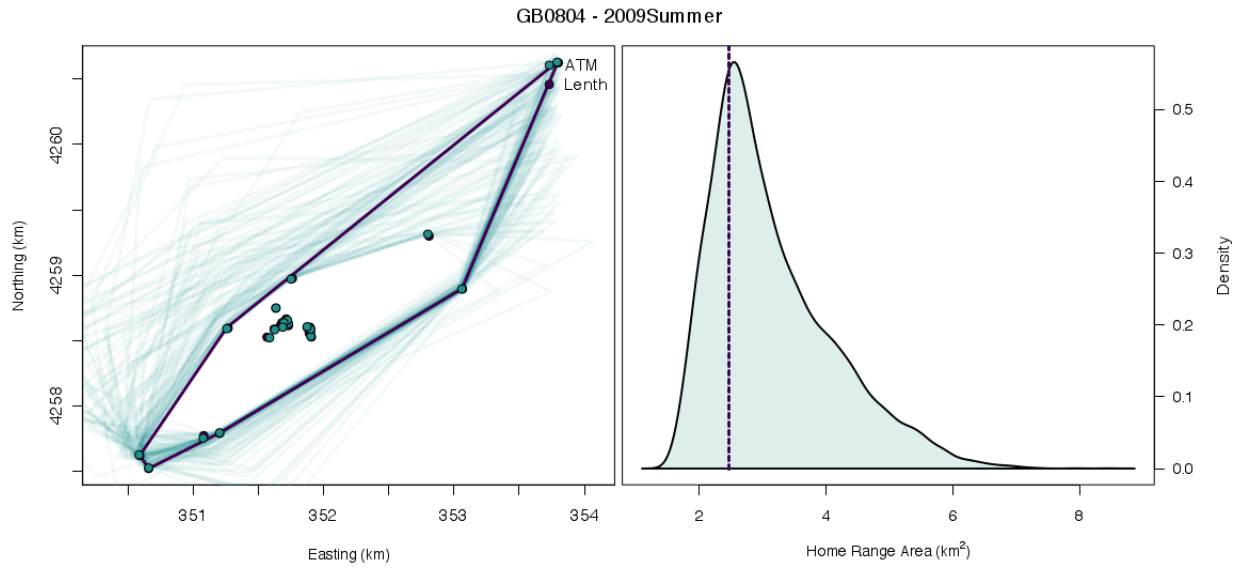

(a)

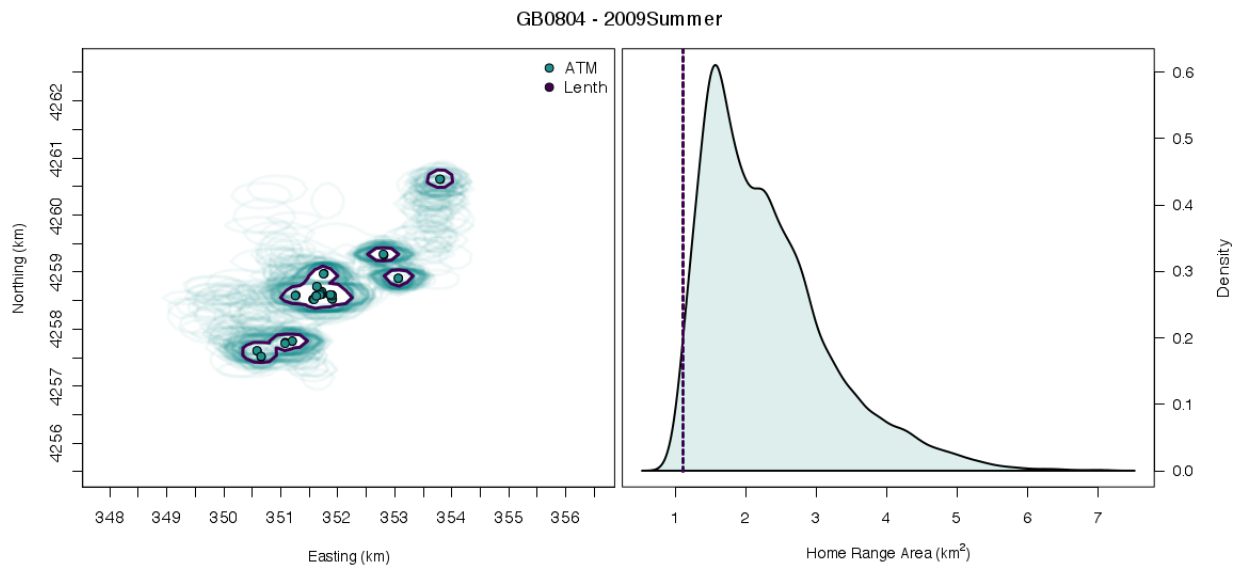

(b)

Figure 35

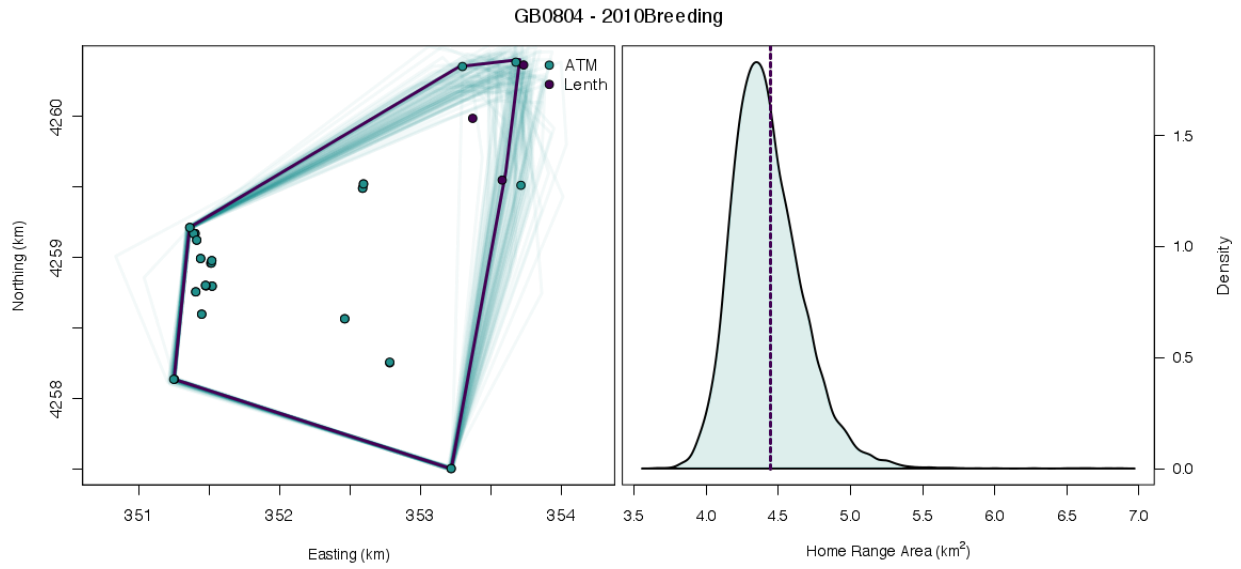

(a)

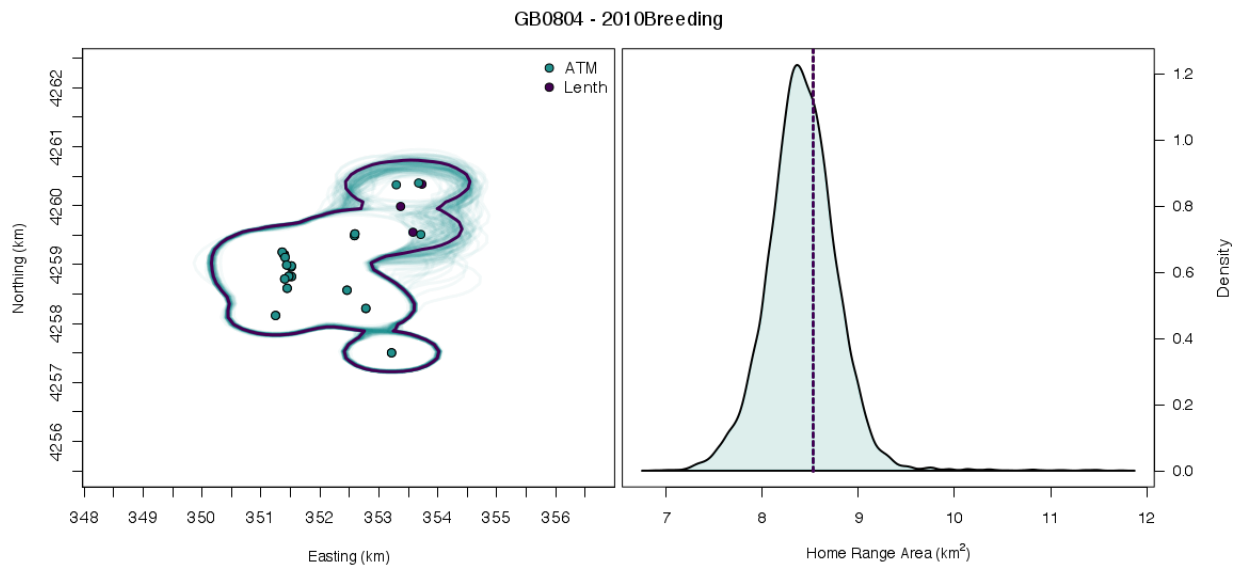

(b)

Figure 36

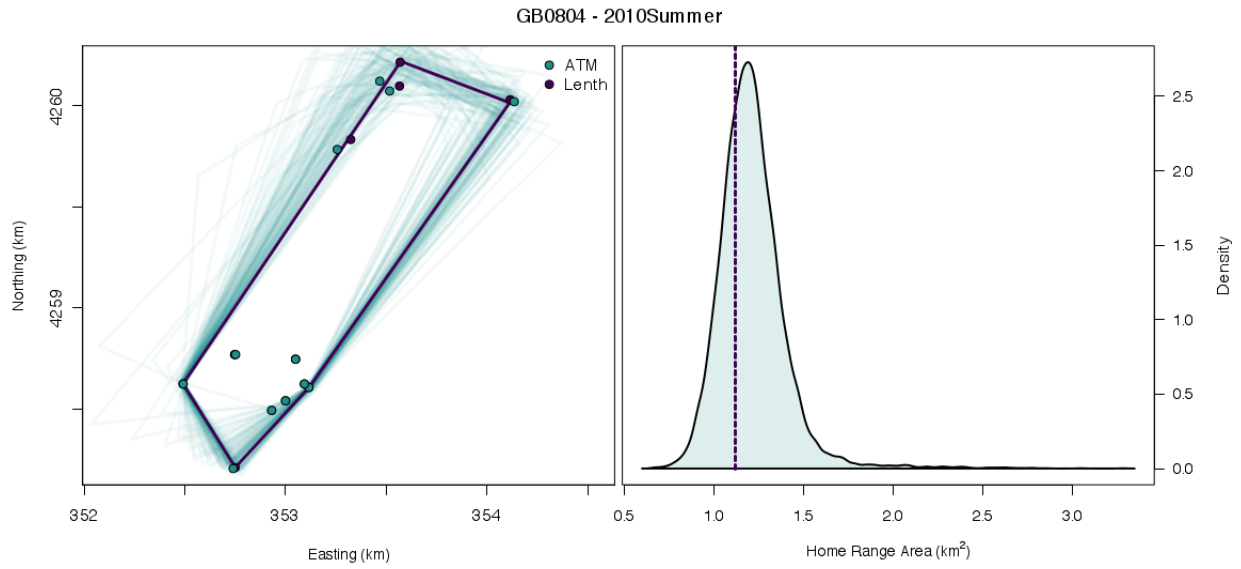

(a)

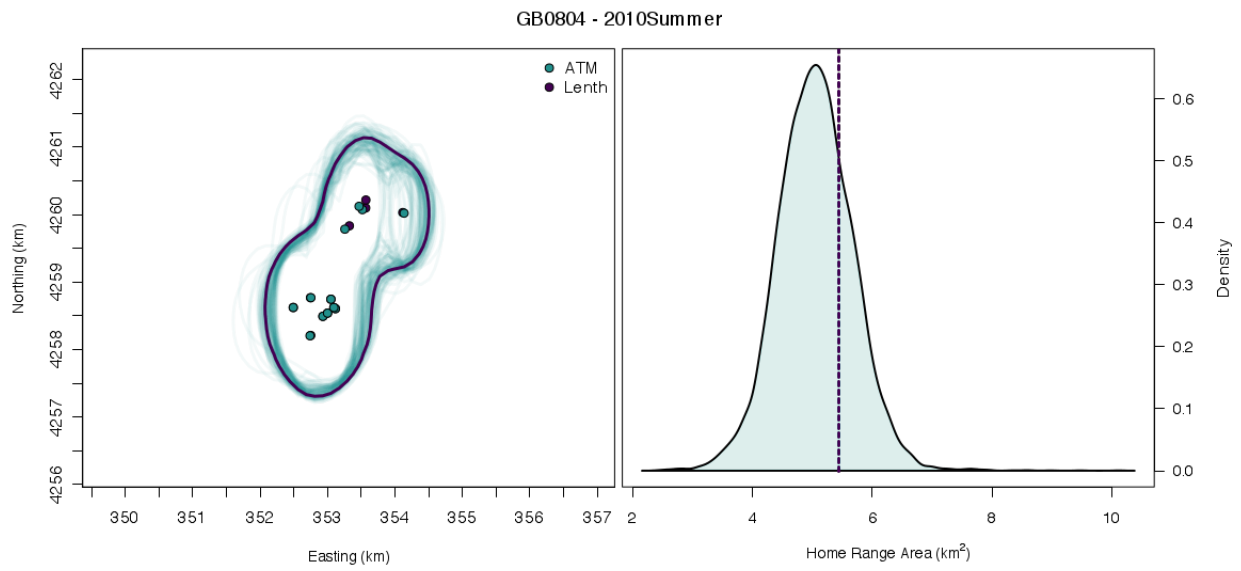

(b)

Figure 37

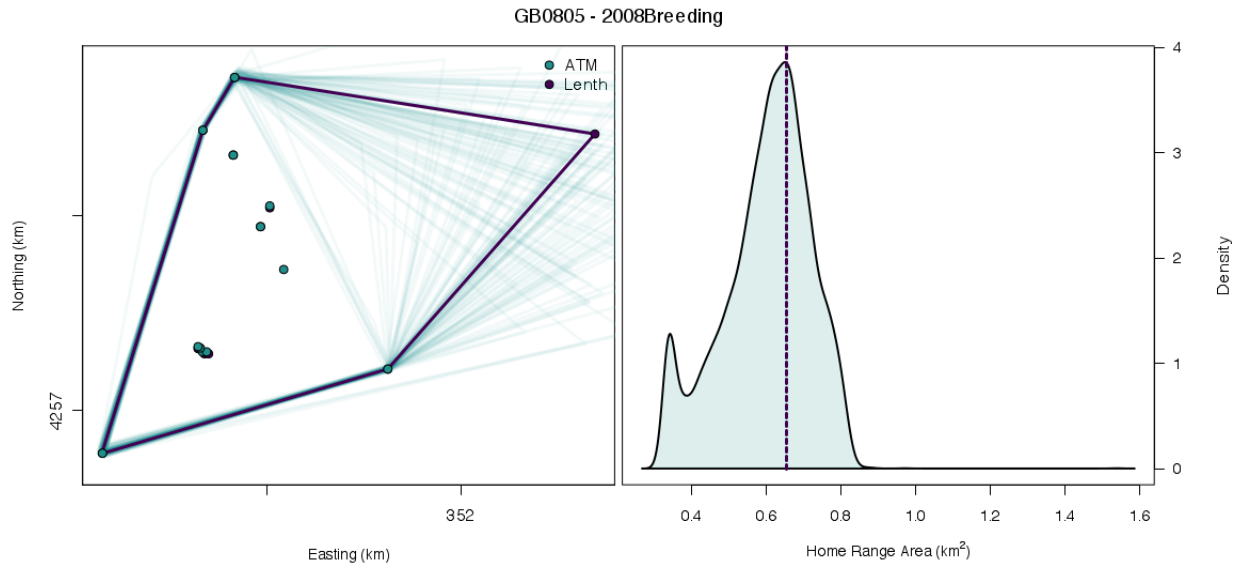

(a)

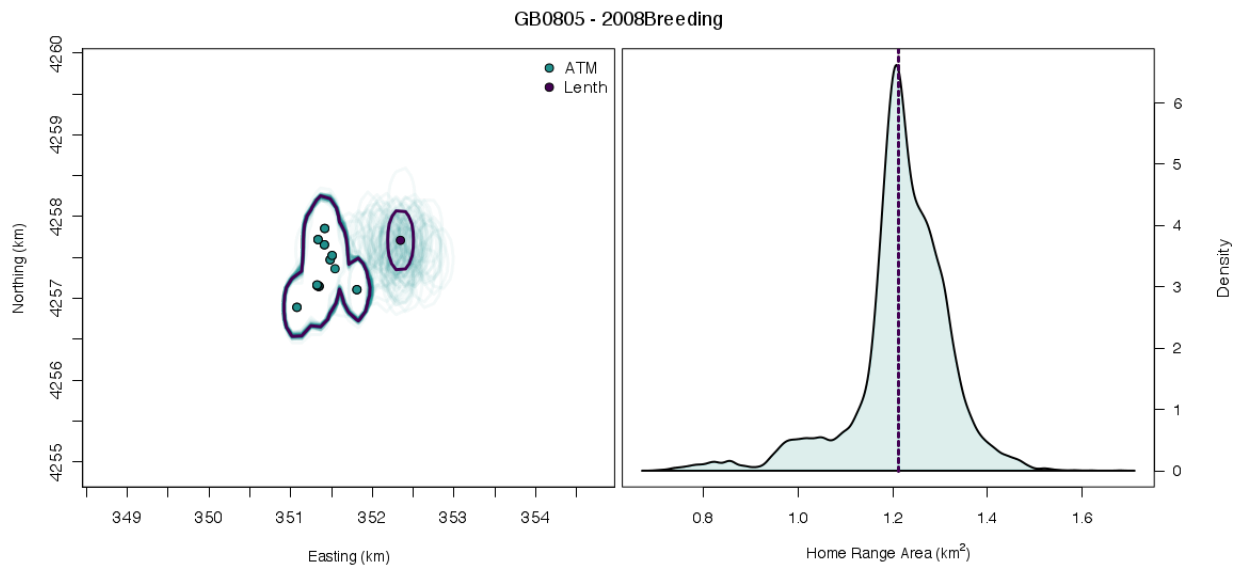

(b)

Figure 38

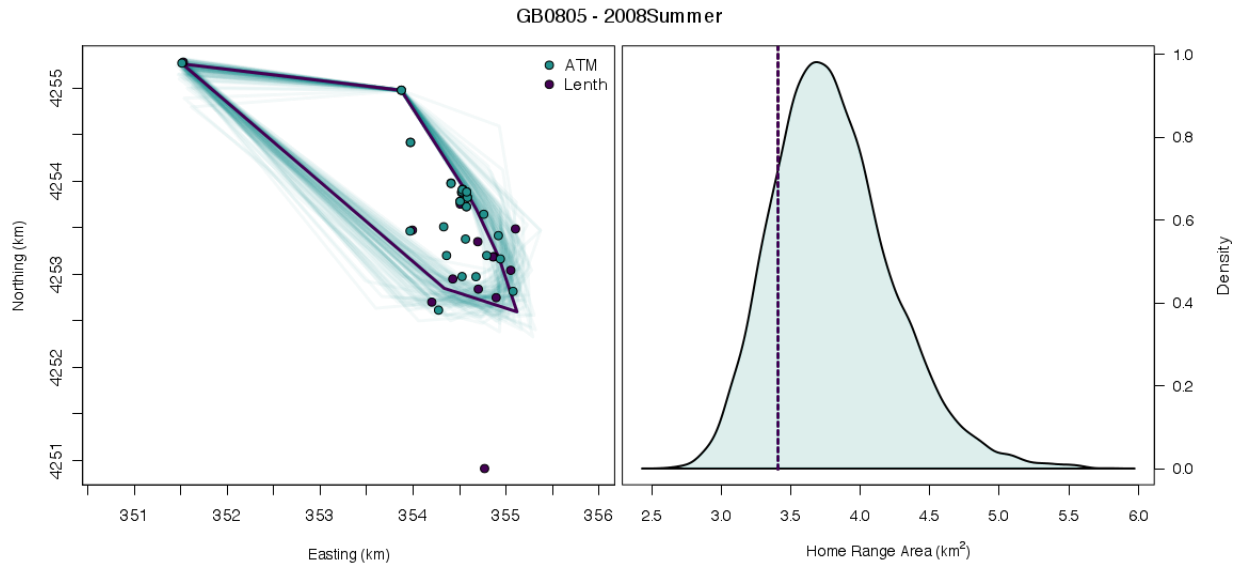

(a)

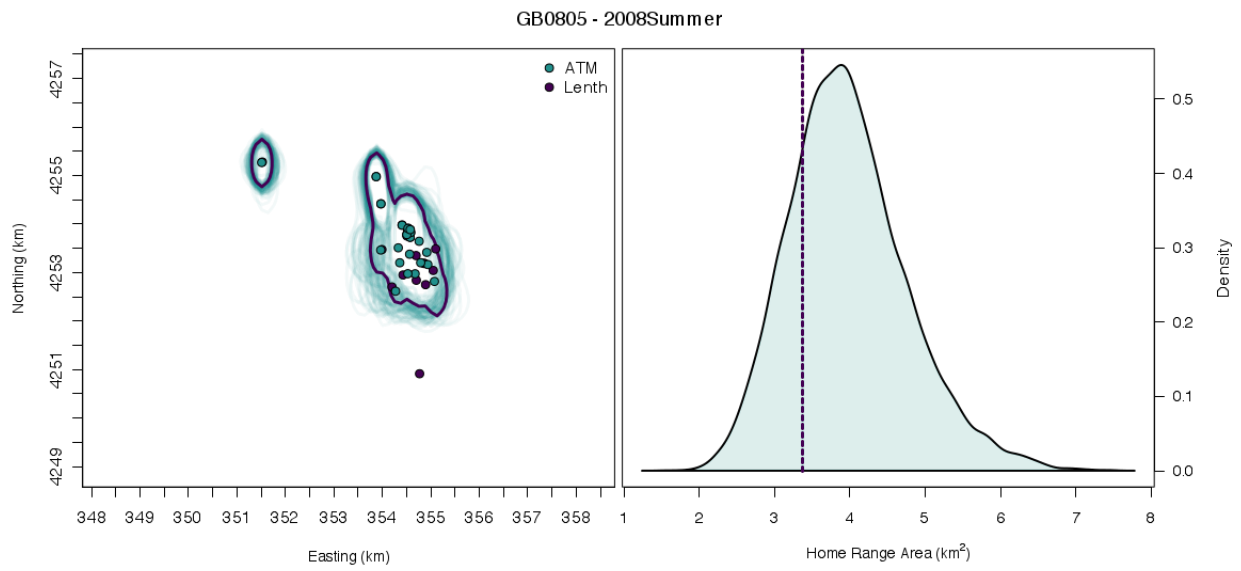

(b)

Figure 39



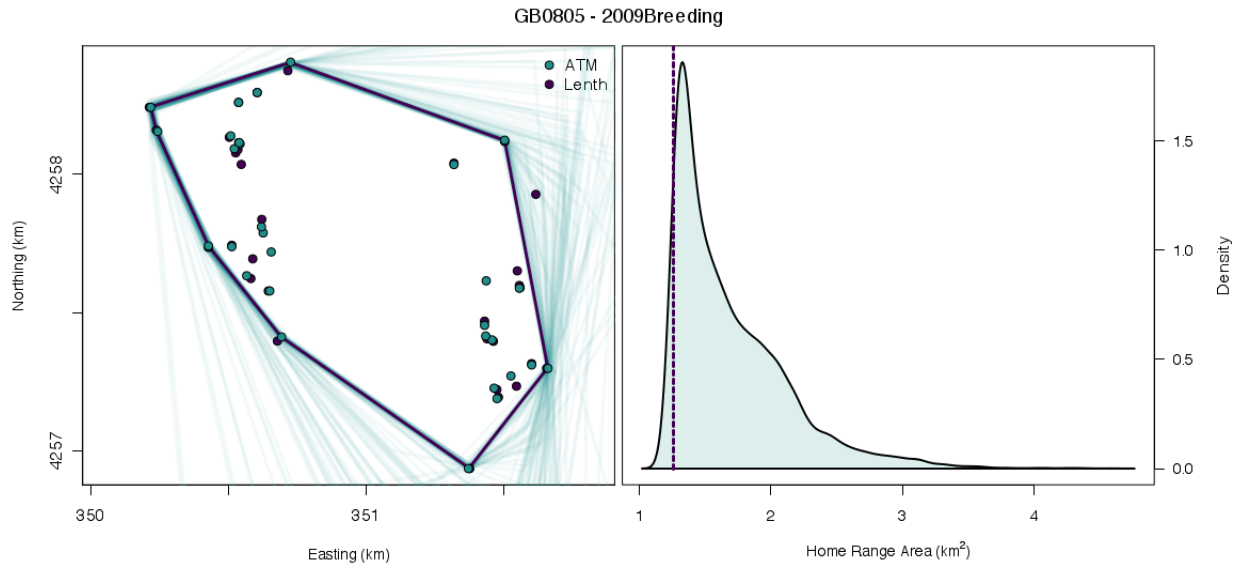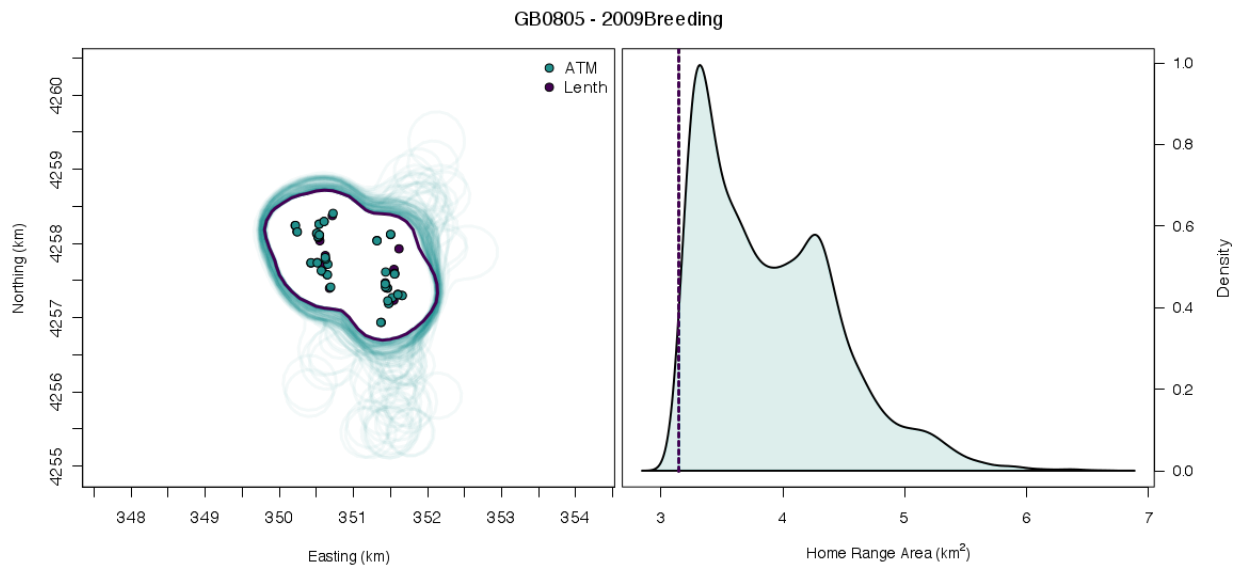

Figure 40

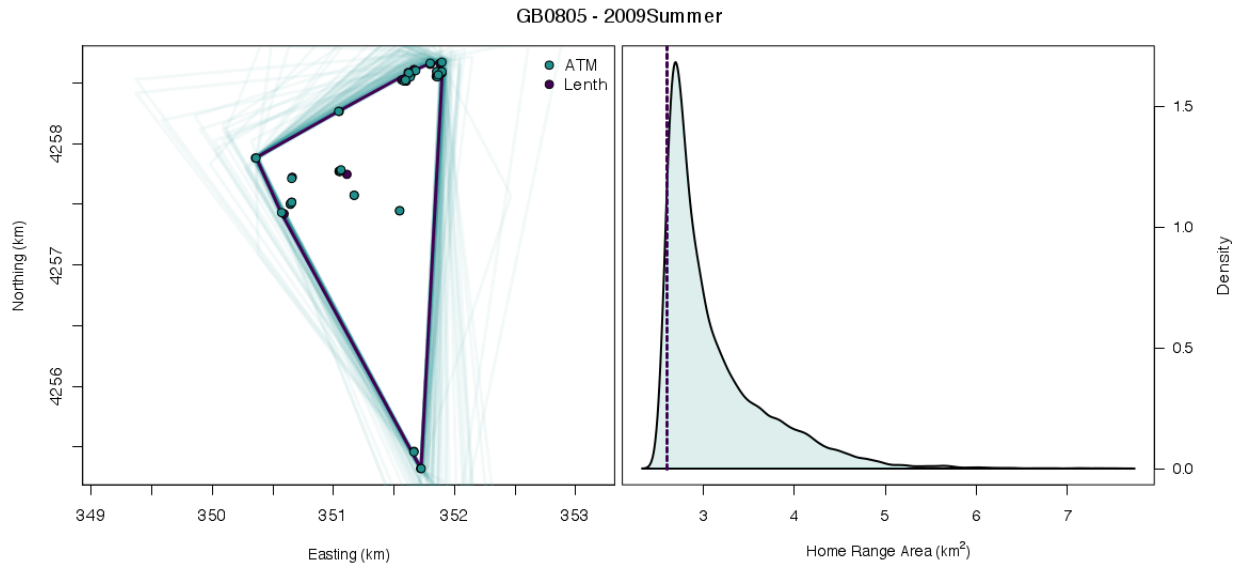

(a)

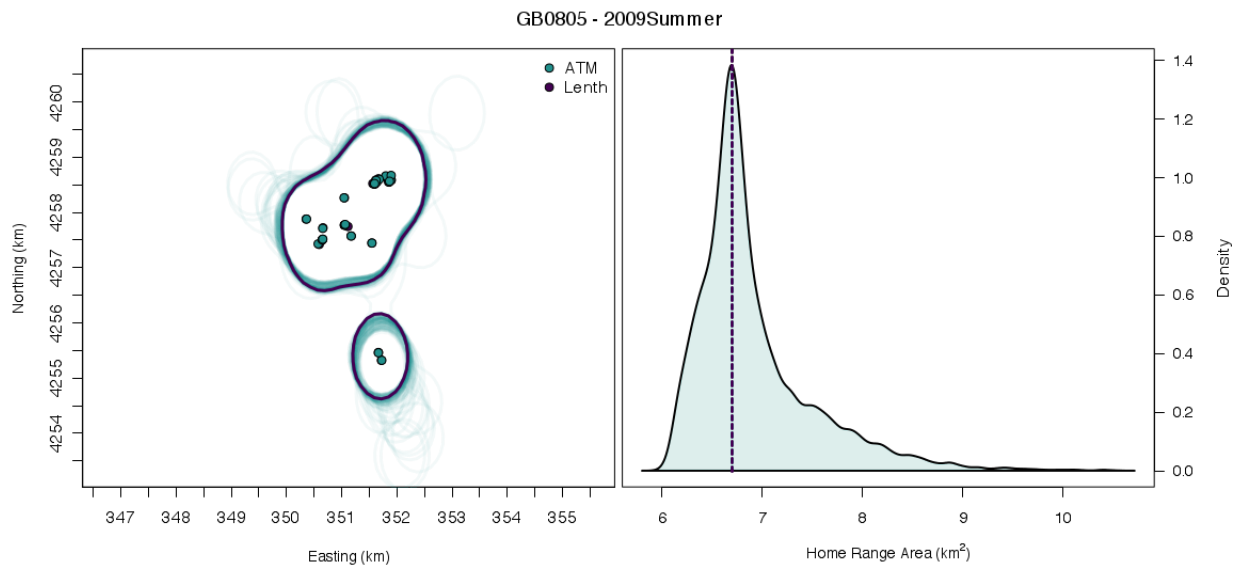

(b)

Figure 41

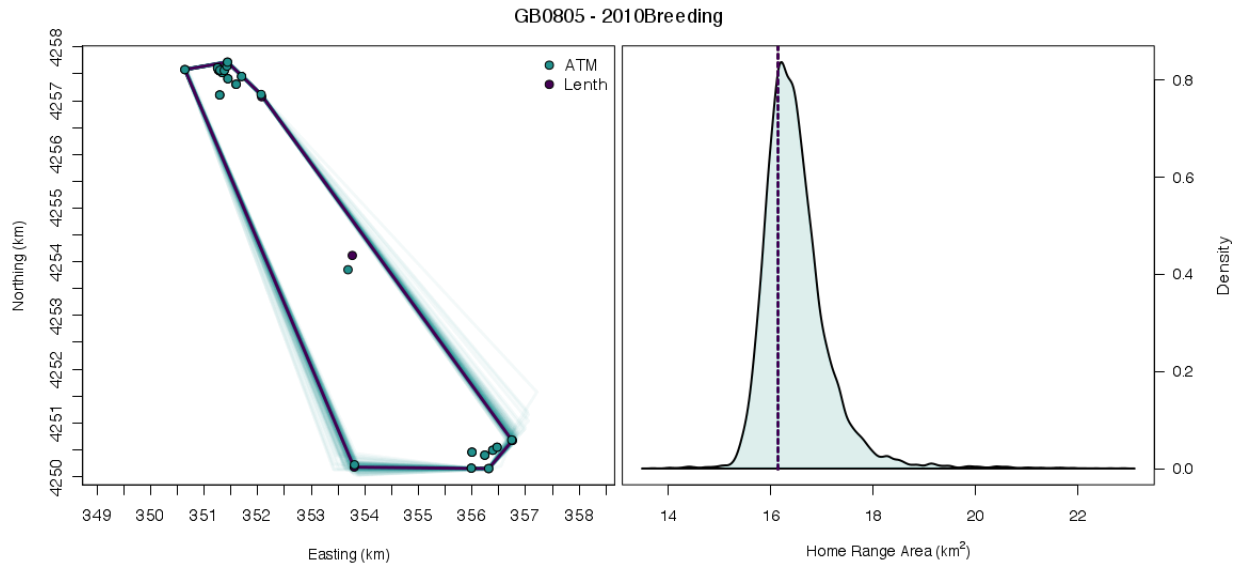

(a)

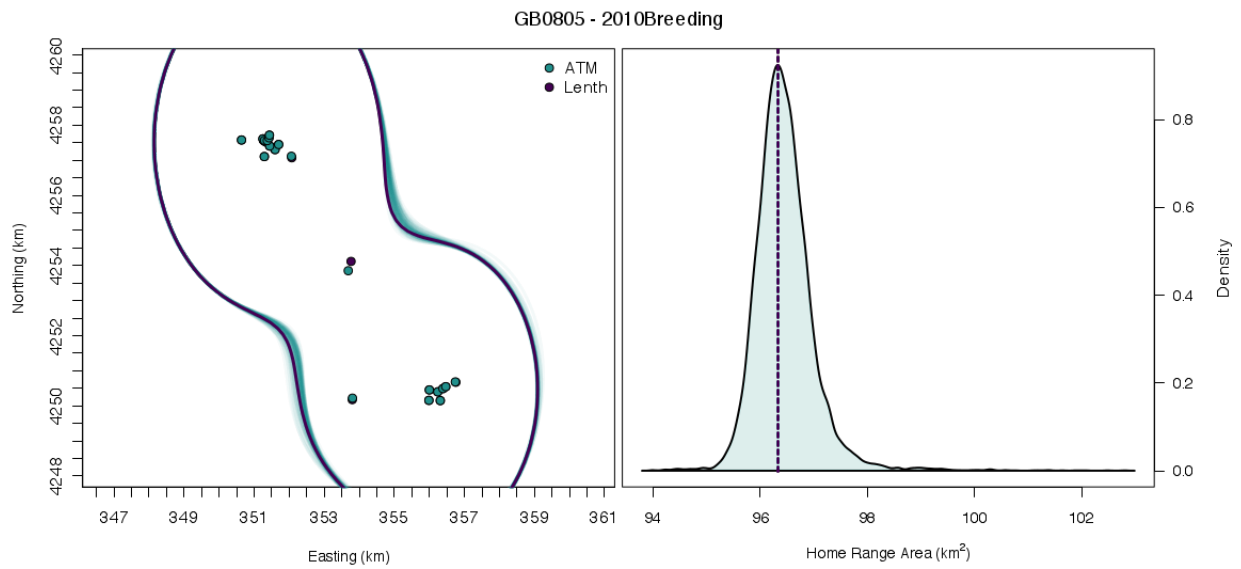

(b)

Figure 42

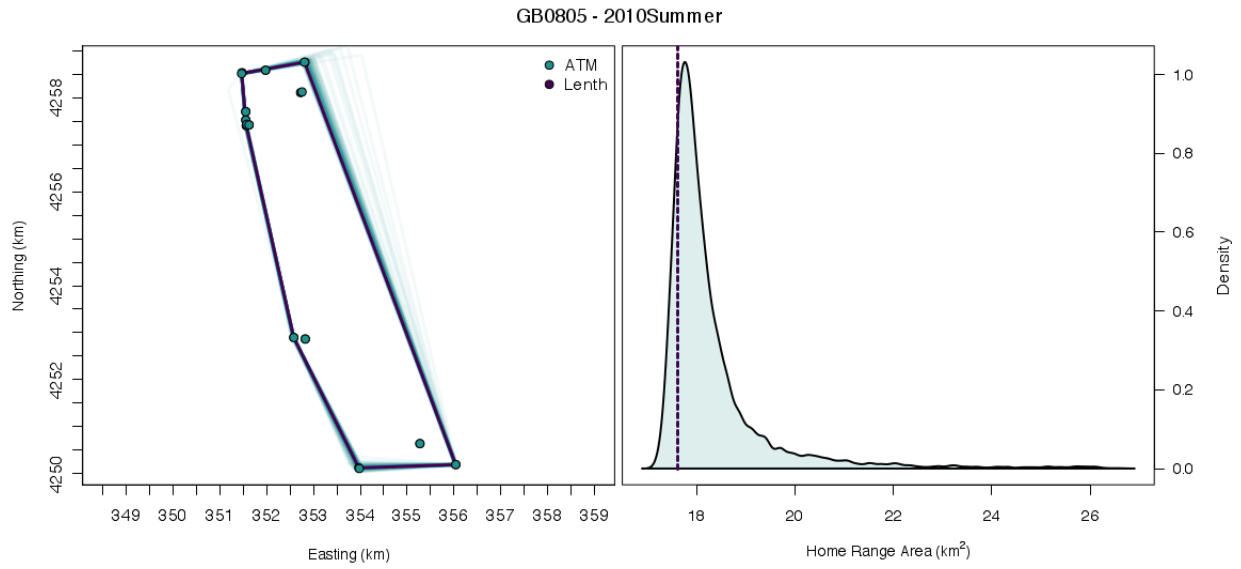

(a)

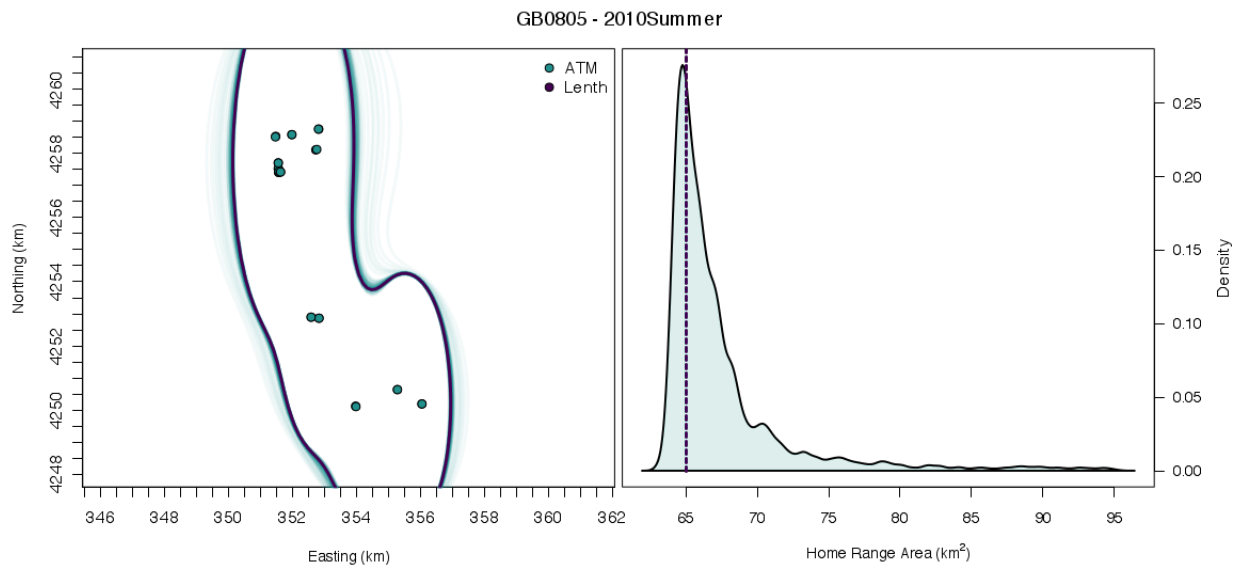

(b)

Figure 43

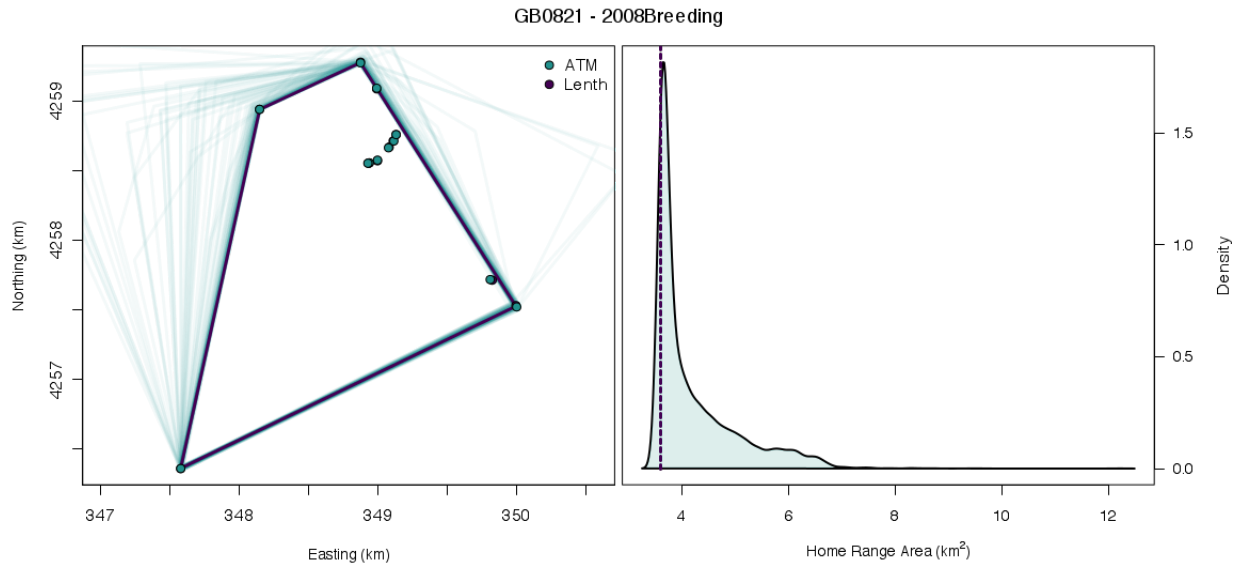

(a)

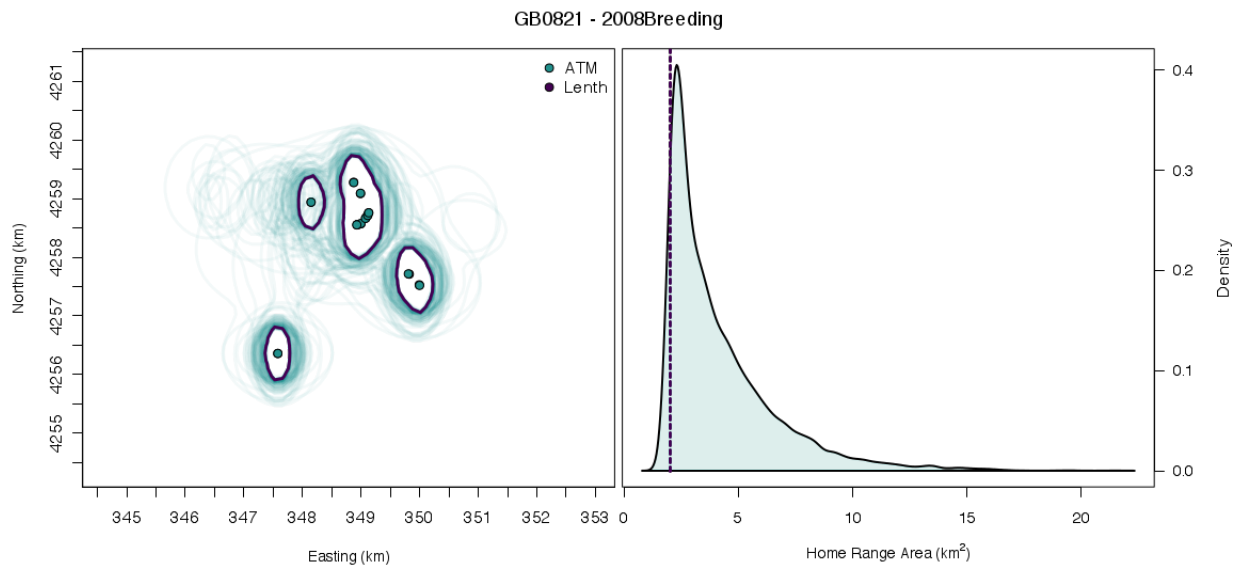

(b)

Figure 44

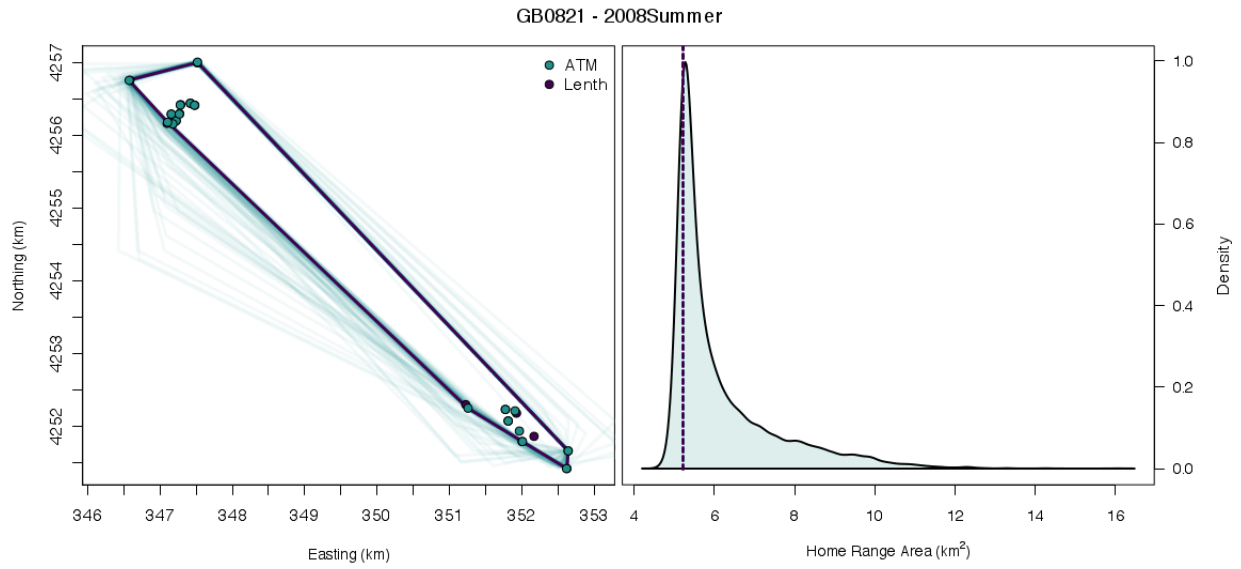

(a)

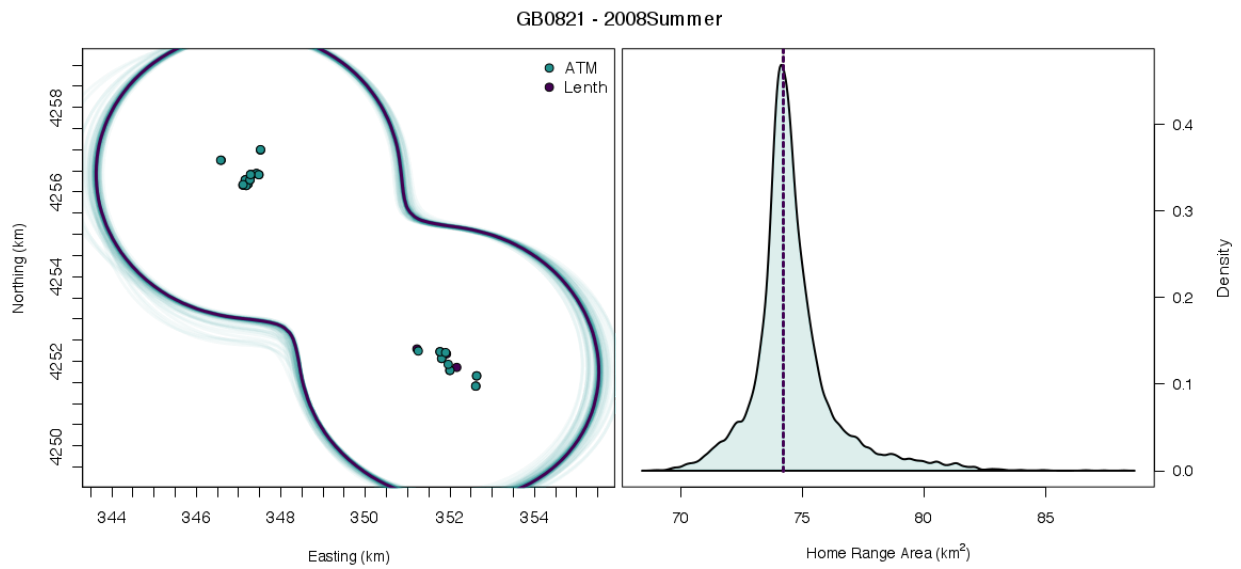

(b)

Figure 45

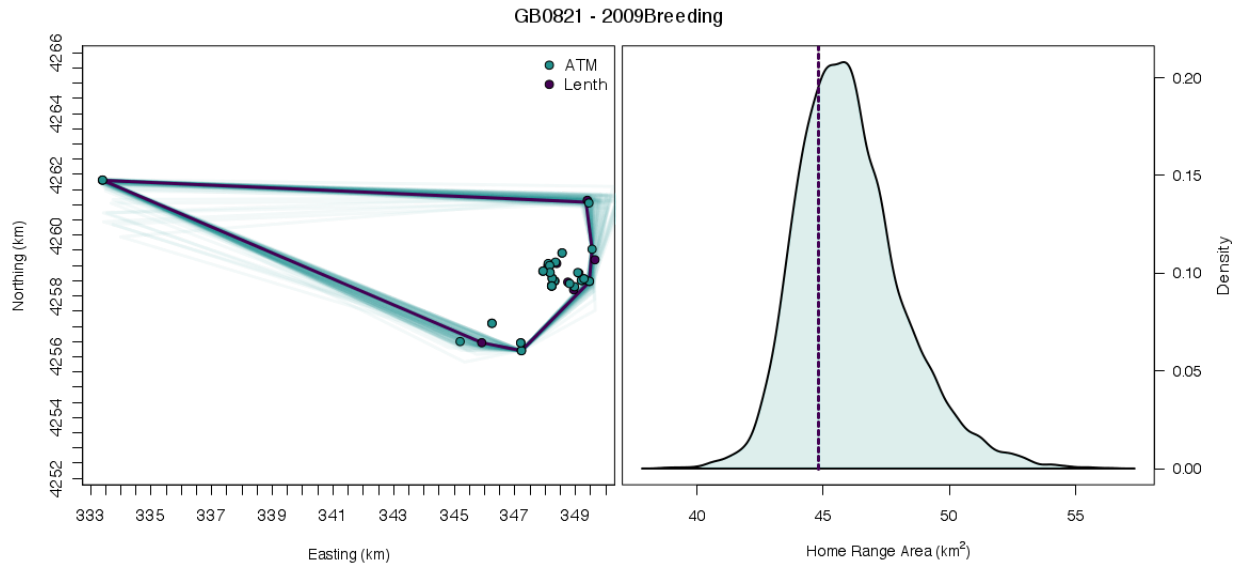

(a)

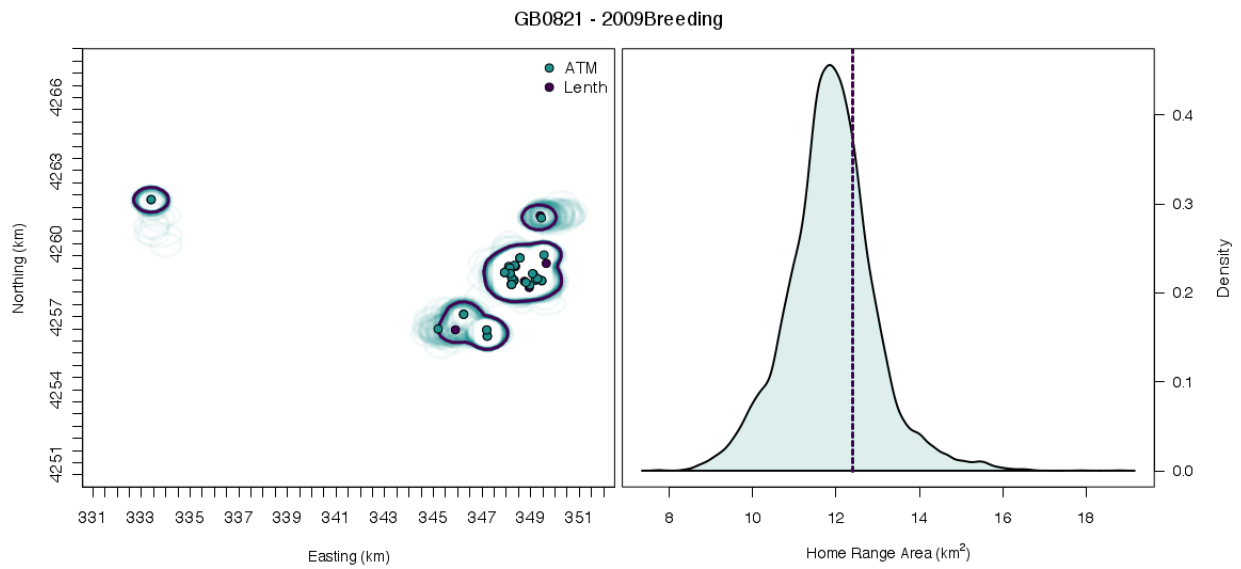

(b)

Figure 46

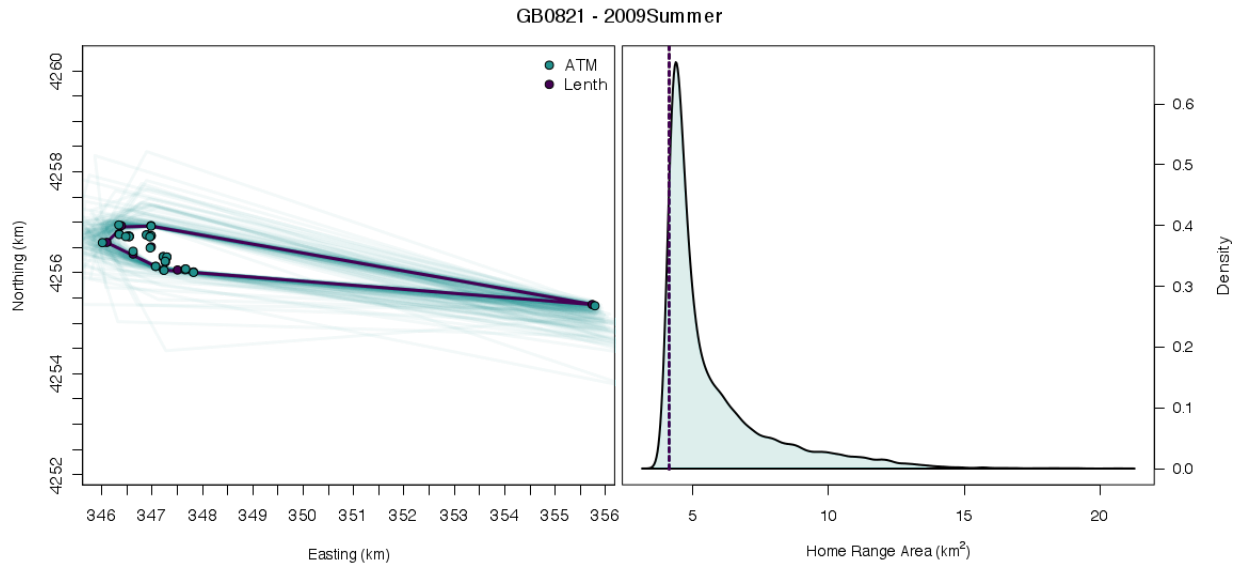

(a)

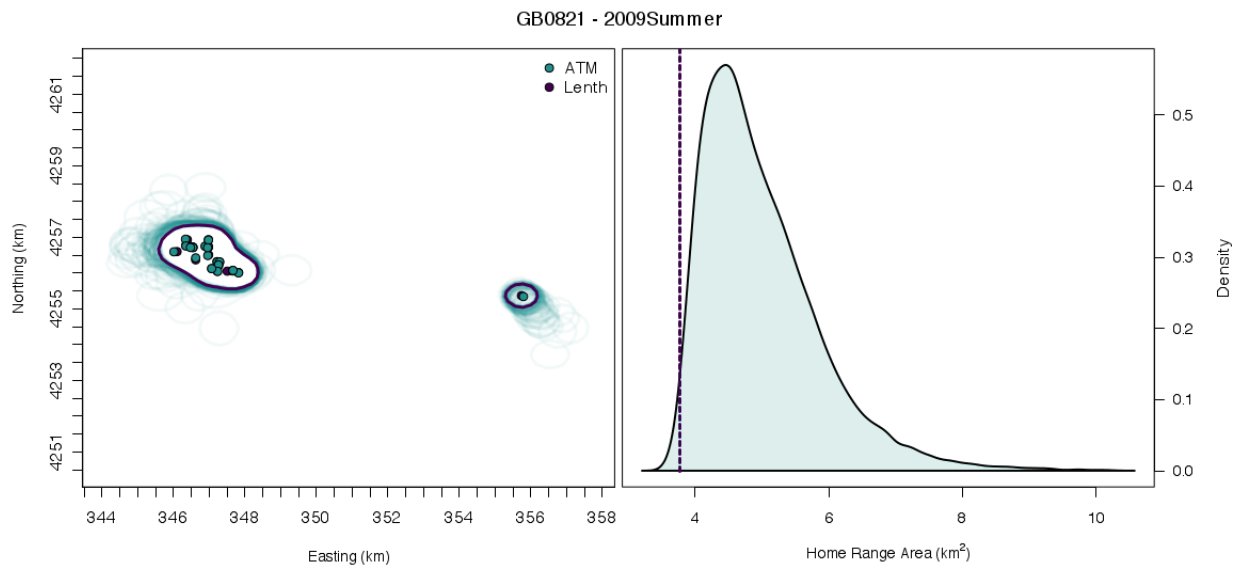

(b)

Figure 47



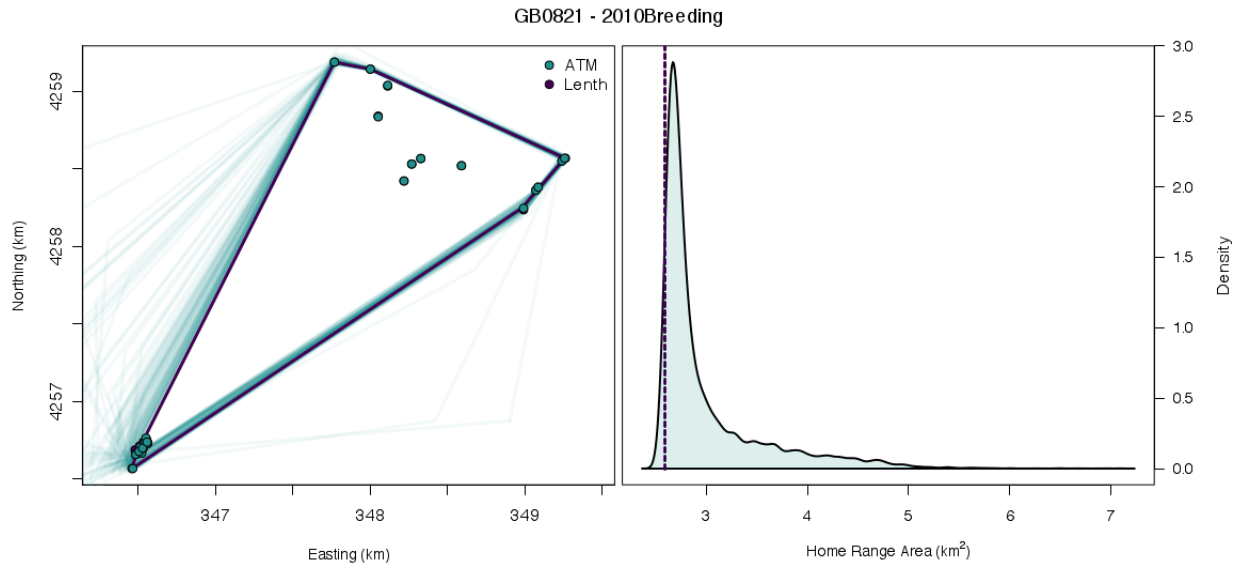

(a)

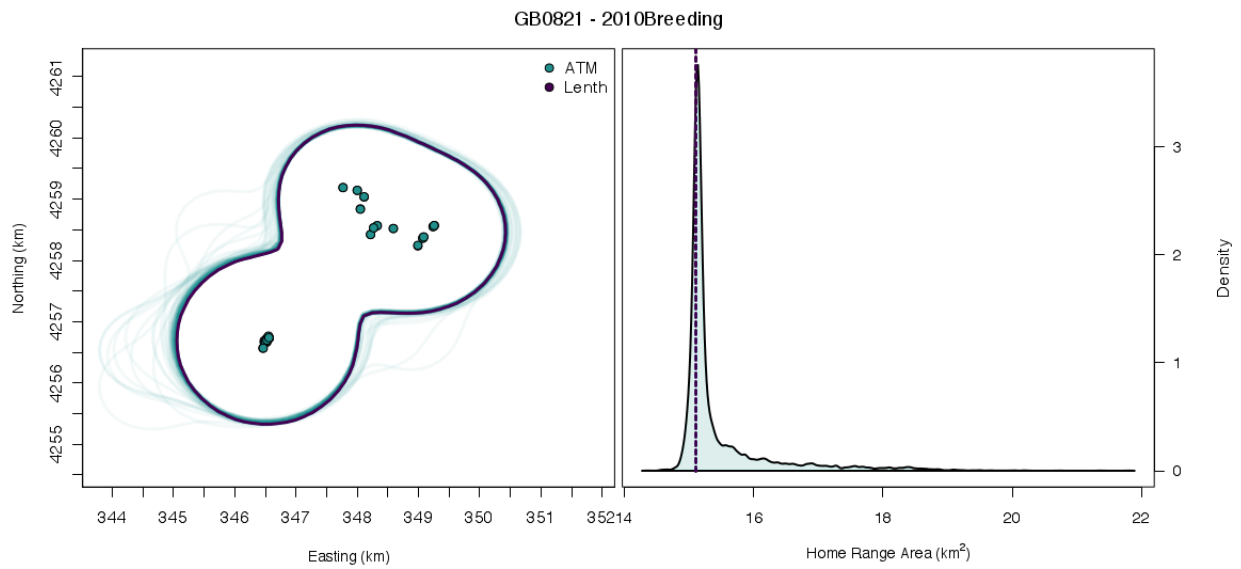

(b)

Figure 48

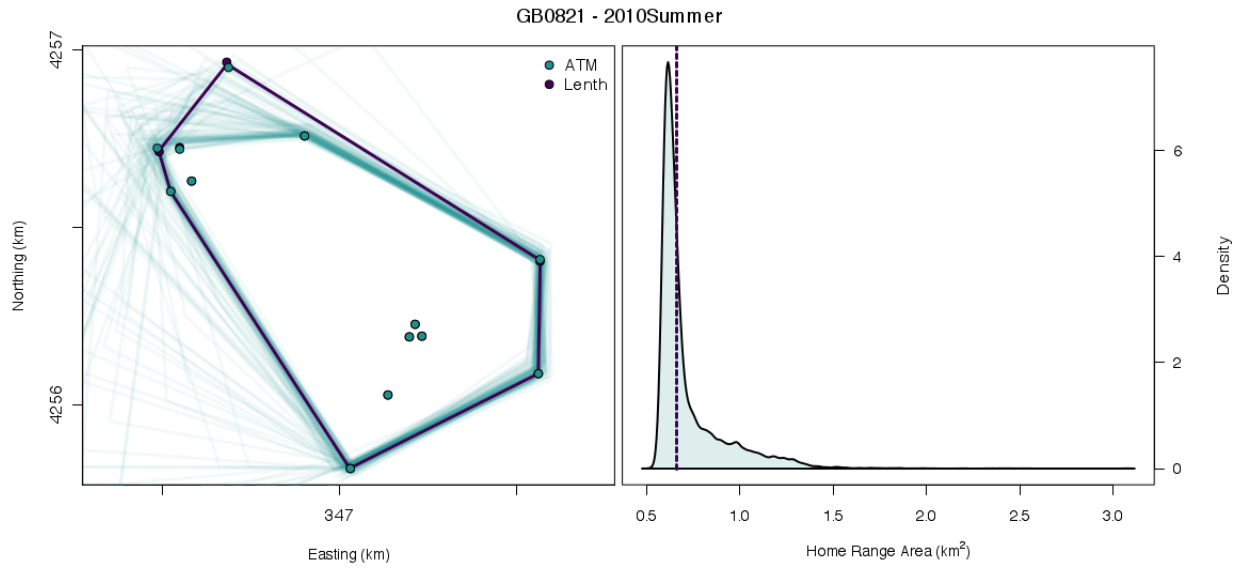

(a)

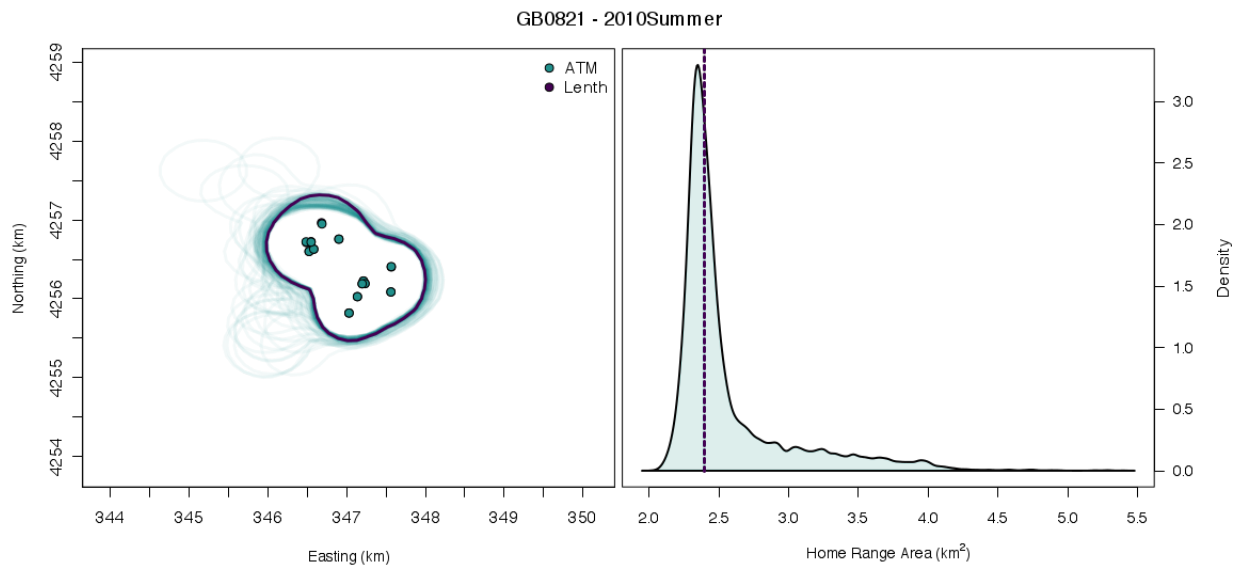

(b)

Figure 49
